# Supplementary material for: DFT calculations bring insight to internal alkyne-to-vinylidene transformations at rhodium PNP- and PONOP-pincer complexes
Source: Royal Society of Chemistry journal article supplement (doi:10.1039/d0ra08764e), 2021-01-01
Supplement: d0ra08764e1.pdf [file d0ra08764e1.pdf]

# **DFT Calculations Bring Insight to Internal Alkyne-to-Vinylidene Transformations at Rhodium PNP- and PONOP-Pincer Complexes**

Nasir A. Rajabi\* and Claire L. McMullin

Department of Chemistry, University of Bath, Claverton Down, Bath, BA2 7AY, UK.

## Breakdown of Energy Contributions

The following tables detail the evolution of the relative energies as the successive corrections to the initial SCF energy are included. Terms used are:

|                         |                                                                                                       |
|-------------------------|-------------------------------------------------------------------------------------------------------|
| $\Delta E_{BS1}$        | SCF energy computed with the BP86 functional with BS1                                                 |
| $\Delta H_{BS1}$        | Enthalpy at 0 K with BS1                                                                              |
| $\Delta G_{BS1}$        | Free energy at 298.15 K and 1 atm with BS1                                                            |
| $\Delta G_{BS1/DFB}$    | Free energy corrected for 1,2-difluorobenzene (DFB) solvent with BS1                                  |
| $\Delta G_{BS1/DFB+D3}$ | Free energy corrected for DFB and dispersion effects with BS1                                         |
| $\Delta E_{BS2}$        | SCF energy computed with the BP86 functional with BS2                                                 |
| $\Delta G_{DFB}$        | Free energy corrected for basis set (BS2), dispersion effects and DFB solvent                         |
| $\Delta G_{FB}$         | Free energy corrected for basis set (BS2), dispersion effects and fluorobenzene solvent (FB, in blue) |

In each case the final data used in the main article is highlighted in bold.

**Table S1** – Relative energies (kcal/mol) for computed structures in Pathways I, II and III. Data in bold are those used in the main text. All energies are quoted relative to **9<sub>x</sub>** and **HC≡CR** at 0.0 kcal mol<sup>-1</sup> (X = CH<sub>2</sub> and O; R = <sup>t</sup>Bu and Ar' (3,5-<sup>t</sup>Bu<sub>2</sub>C<sub>6</sub>H<sub>3</sub>)).

|                                 | $\Delta E_{BS1}$ | $\Delta H_{BS1}$ | $\Delta G_{BS1}$ | $\Delta G_{BS1/DFB}$ | $\Delta G_{BS1/DFB+D3}$ | $\Delta E_{BS2}$ | $\Delta G_{DFB}$ | $\Delta G_{FB}$ |
|---------------------------------|------------------|------------------|------------------|----------------------|-------------------------|------------------|------------------|-----------------|
| <b>9<sub>x</sub> + HC≡CR</b>    | 0.0              | 0.0              | 0.0              | 0.0                  | 0.0                     | 0.0              | <b>0.0</b>       | 0.0             |
| <b>A<sub>C</sub></b>            | -9.1             | -10.9            | -26.3            | -2.8                 | +23.5                   | -12.5            | <b>+20.0</b>     | +18.1           |
| <b>B<sub>C-tBu</sub></b>        | -38.0            | -37.7            | -38.2            | -7.5                 | -1.9                    | -36.3            | <b>-0.2</b>      | -3.7            |
| <b>TS(B-10)<sub>C-tBu</sub></b> | +3.7             | 1.7              | +1.5             | +31.5                | +37.8                   | +6.0             | <b>+40.1</b>     | +36.8           |
| <b>TS(B-C)<sub>C-tBu</sub></b>  | -30.7            | -32.2            | -34.3            | -2.8                 | +7.2                    | -29.1            | <b>+8.8</b>      | +5.2            |
| <b>C<sub>C-tBu</sub></b>        | -40.5            | -42.0            | -45.1            | -14.2                | -2.9                    | -40.6            | <b>-3.0</b>      | -6.4            |
| <b>TS(C-D)<sub>C-tBu</sub></b>  | +2.6             | 0.8              | 0.0              | +28.5                | 35.9                    | +4.4             | <b>+37.7</b>     | +34.8           |
| <b>D<sub>C-tBu</sub></b>        | +2.0             | 0.5              | -0.3             | +27.8                | +35.0                   | +3.4             | <b>+36.4</b>     | +33.6           |
| <b>TS(C-10)<sub>C-tBu</sub></b> | -29.7            | -32.6            | -35.1            | -3.9                 | +7.8                    | -28.7            | <b>+8.7</b>      | +5.3            |
| <b>TS(C-E)<sub>C-tBu</sub></b>  | -38.2            | -40.7            | -42.7            | -13.5                | -2.8                    | -38.2            | <b>-2.8</b>      | -5.8            |
| <b>E<sub>C-tBu</sub></b>        | -42.9            | -44.4            | -46.3            | -23.6                | -13.7                   | -42.3            | <b>-8.1</b>      | -10.6           |
| <b>10<sub>C-tBu</sub></b>       | -52.3            | -52.4            | -53.9            | -27.0                | -17.1                   | -50.6            | <b>-12.1</b>     | -15.5           |
| <b>A<sub>O</sub></b>            | -5.3             | -7.2             | -22.5            | +1.8                 | +26.0                   | -8.3             | <b>23.0</b>      | +20.9           |
| <b>B<sub>O-tBu</sub></b>        | -41.1            | -41.6            | -42.7            | -9.8                 | -5.5                    | -39.2            | <b>-3.7</b>      | -7.7            |
| <b>TS(B-10)<sub>tBu</sub></b>   | +2.5             | -0.1             | -1.6             | +30.9                | +36.9                   | 4.9              | <b>+39.4</b>     | +35.5           |
| <b>TS(B-C)<sub>O-tBu</sub></b>  | -32.7            | -34.7            | -37.7            | -4.4                 | +4.6                    | -30.8            | <b>+6.5</b>      | +2.4            |
| <b>C<sub>O-tBu</sub></b>        | -38.4            | -40.0            | -43.6            | -9.9                 | +0.9                    | -38.0            | <b>+1.3</b>      | -2.8            |
| <b>TS(C-D)<sub>O-tBu</sub></b>  | +1.6             | -1.1             | -2.3             | 29.7                 | +36.5                   | +3.7             | <b>+38.5</b>     | +34.7           |
| <b>D<sub>O-tBu</sub></b>        | +1.5             | -0.7             | -2.6             | 28.7                 | +35.2                   | +3.3             | <b>+37.0</b>     | +33.4           |
| <b>TS(C-10)<sub>O-tBu</sub></b> | -28.5            | -31.6            | -35.4            | -2.2                 | +8.9                    | -27.3            | <b>+10.2</b>     | +6.2            |
| <b>TS(C-E)<sub>O-tBu</sub></b>  | -35.2            | -38.0            | -41.7            | -9.5                 | +0.3                    | -34.7            | <b>+0.8</b>      | -2.9            |
| <b>E<sub>O-tBu</sub></b>        | -39.1            | -40.8            | -42.2            | -11.2                | -1.8                    | -37.9            | <b>-0.6</b>      | -4.0            |
| <b>10<sub>O-tBu</sub></b>       | -49.7            | -50.2            | -53.4            | -20.1                | -10.9                   | -47.6            | <b>-8.9</b>      | -12.9           |
| <b>B<sub>C-Ar</sub></b>         | -47.6            | -48.0            | -48.9            | -16.7                | -13.7                   | -46.5            | <b>-12.6</b>     | -16.1           |
| <b>TS(B-10)<sub>C-Ar</sub></b>  | -3.4             | -5.8             | -7.0             | +24.8                | +28.5                   | -1.6             | <b>+30.3</b>     | +26.9           |
| <b>TS(B-C)<sub>-Ar</sub></b>    | -41.7            | -43.1            | -43.9            | -10.0                | -1.3                    | -40.2            | <b>+0.2</b>      | -3.7            |
| <b>C<sub>C-Ar</sub></b>         | -44.5            | -45.8            | -47.5            | -15.2                | -4.2                    | -44.8            | <b>-4.5</b>      | -8.1            |
| <b>TS(C-D)<sub>-Ar</sub></b>    | -4.3             | -6.4             | -8.0             | +23.0                | 28.2                    | -2.7             | <b>+29.8</b>     | +26.5           |
| <b>TS(C-10)<sub>-Ar</sub></b>   | -32.8            | -35.9            | -37.9            | -4.7                 | +7.0                    | -32.2            | <b>+7.6</b>      | 3.9             |
| <b>TS(C-E)<sub>-Ar</sub></b>    | -40.8            | -43.5            | -45.4            | -15.6                | -5.0                    | -41.3            | <b>-5.5</b>      | -8.5            |
| <b>D<sub>C-Ar</sub></b>         | -45.4            | -47.1            | -49.5            | -21.8                | -11.5                   | -45.3            | <b>-11.4</b>     | -13.7           |
| <b>10<sub>C-Ar</sub></b>        | -53.9            | -54.2            | -56.3            | -25.7                | -16.6                   | -52.9            | <b>-15.7</b>     | -18.9           |
| <b>B<sub>O-Ar</sub></b>         | -47.8            | -48.2            | -49.4            | -14.4                | -12.6                   | -46.2            | <b>-11.0</b>     | -15.3           |
| <b>TS(B-10)<sub>O-Ar</sub></b>  | -4.6             | -7.3             | -8.5             | 26.2                 | +28.9                   | -2.5             | <b>+31.0</b>     | +26.8           |
| <b>TS(B-C)<sub>O-Ar</sub></b>   | -40.2            | -41.7            | -44.1            | -7.9                 | +1.1                    | -38.6            | <b>+2.8</b>      | -1.6            |

|                                   |       |       |       |       |       |       |              |       |
|-----------------------------------|-------|-------|-------|-------|-------|-------|--------------|-------|
| <b>C</b> <sub>O-Ar</sub>          | -42.1 | -43.7 | -47.0 | -11.6 | -1.1  | -41.9 | <b>-1.0</b>  | -5.2  |
| <b>TS(C-D)</b> <sub>O-Ar</sub>    | -4.5  | -6.8  | -7.8  | +26.5 | +29.8 | -2.7  | <b>+31.6</b> | +27.6 |
| <b>TS(C-10)</b> <sub>O-Ar</sub>   | -31.7 | -34.9 | -38.6 | -3.0  | +8.2  | -30.8 | <b>+9.1</b>  | +4.9  |
| <b>TS(C-E)</b> <sub>O-Ar</sub>    | -37.8 | -40.7 | -43.9 | -10.9 | -1.3  | -37.7 | <b>-1.2</b>  | -5.0  |
| <b>E</b> <sub>O-Ar</sub>          | -41.4 | -43.2 | -45.8 | -14.3 | -5.1  | -40.7 | <b>-4.4</b>  | -7.7  |
| <b>10</b> <sub>O-Ar</sub>         | -51.1 | -51.5 | -54.5 | -20.5 | -12.6 | -49.4 | <b>-10.9</b> | -15.0 |
| <b>TS(C-10)</b> <sub>C-NMe2</sub> | -37.4 | -39.7 | -41.8 | -10.0 | +3.0  | -35.7 | <b>+4.7</b>  | +1.2  |
| <b>A</b> <sub>NH</sub>            | -6.8  | -8.9  | -25.1 | -1.8  | 23.7  | -10.1 | <b>+20.3</b> | 18.4  |
| <b>B</b> <sub>NH</sub>            | -48.2 | -48.8 | -50.4 | -17.4 | -14.5 | -46.9 | <b>-13.2</b> | -17.0 |
| <b>10</b> <sub>NH</sub>           | -52.9 | -53.5 | -57.0 | -25.2 | -16.7 | -51.5 | <b>-15.3</b> | -18.9 |
| <b>A</b> <sub>S</sub>             | -19.5 | -22.1 | -39.0 | -10.2 | 16.2  | -23.1 | <b>+12.6</b> | 9.5   |
| <b>B</b> <sub>S</sub>             | -56.4 | -56.9 | -60.9 | -26.4 | -23.3 | -54.7 | <b>-21.5</b> | -25.6 |
| <b>10</b> <sub>S</sub>            | -64.7 | -65.0 | -69.4 | -35.6 | -26.2 | -63.2 | <b>-24.7</b> | -28.7 |

---

**Table S2** – DFT calculated free energies in kcal mol<sup>-1</sup> for the direct 1,2-R transfer in the Rh-alkyne species **B**<sub>X-R</sub> to form the Rh-vinylidene species **10**<sub>X-R</sub> via Pathway I. All free energies are quoted with respect to **9**<sub>X</sub> and **HC≡CR** (X = CH<sub>2</sub> and O, R = <sup>t</sup>Bu and Ar' (3,5-<sup>t</sup>Bu<sub>2</sub>C<sub>6</sub>H<sub>3</sub>)).

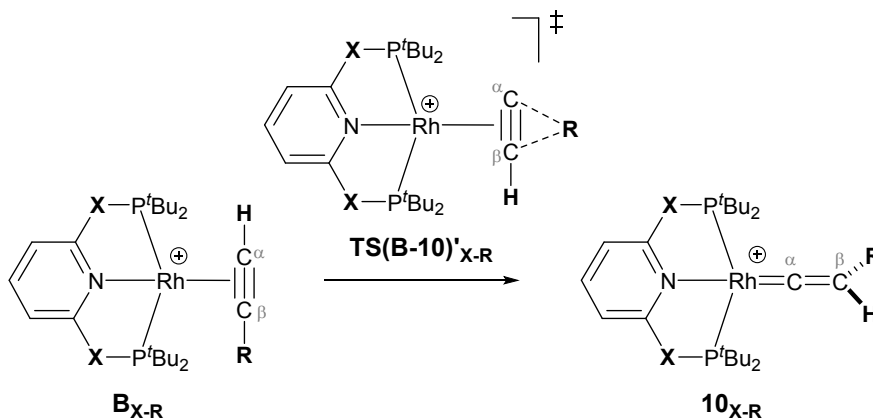

|                                              | $\Delta E_{BS1}$ | $\Delta H_{BS1}$ | $\Delta G_{BS1}$ | $\Delta G_{BS1/DFB}$ | $\Delta G_{BS1/DFB+D3}$ | $\Delta E_{BS2}$ | $\Delta G_{DFB}$ | $\Delta G_{FB}$ |
|----------------------------------------------|------------------|------------------|------------------|----------------------|-------------------------|------------------|------------------|-----------------|
| <b>9</b> <sub>X</sub> + <b>HC≡CR</b>         | 0.0              | 0.0              | 0.0              | 0.0                  | 0.0                     | 0.0              | <b>0.0</b>       | 0.0             |
| <b>B</b> <sub>C-<sup>t</sup>Bu</sub>         | -38.0            | -37.7            | -38.2            | -7.5                 | -1.9                    | -36.3            | <b>-0.2</b>      | -3.7            |
| <b>TS(B-10)'</b> <sub>C-<sup>t</sup>Bu</sub> | 21.9             | 20.3             | 20.3             | 50.3                 | 56.5                    | 22.8             | <b>57.4</b>      | 54.2            |
| <b>B</b> <sub>C-Ar</sub>                     | -47.6            | -48.0            | -48.9            | -16.7                | -13.7                   | -46.5            | <b>-12.6</b>     | -16.1           |
| <b>TS(B-10)'</b> <sub>C-Ar</sub>             | 6.0              | 4.7              | 5.6              | 38.6                 | 41.3                    | 8.2              | <b>43.5</b>      | 39.8            |
| <b>B</b> <sub>O-<sup>t</sup>Bu</sub>         | -41.1            | -41.6            | -42.7            | -9.8                 | -5.5                    | -39.2            | <b>-3.7</b>      | -7.7            |
| <b>TS(B-10)'</b> <sub>O-<sup>t</sup>Bu</sub> | 15.8             | 13.2             | 11.3             | 43.4                 | 48.5                    | 16.3             | <b>49.0</b>      | 45.3            |
| <b>B</b> <sub>O-Ar</sub>                     | -47.8            | -48.2            | -49.4            | -14.4                | -12.6                   | -46.2            | <b>-11.0</b>     | -15.3           |
| <b>TS(B-10)'</b> <sub>O-Ar</sub>             | 0.8              | -0.6             | -0.3             | 35.3                 | 36.7                    | 3.3              | <b>39.2</b>      | 34.9            |

**Table S3** – DFT calculated free energies in kcal mol<sup>-1</sup> for the indirect 1,2-R transfer in the Rh-alkyne species **B**<sub>X-R</sub> to form the Rh-vinylidene species **10**<sub>X-R</sub> via Pathway III. All free energies are quoted with respect to **9**<sub>X</sub> and **HC≡CR** (X = CH<sub>2</sub> and O, R = <sup>t</sup>Bu and Ar' (3,5-<sup>t</sup>Bu<sub>2</sub>C<sub>6</sub>H<sub>3</sub>)).

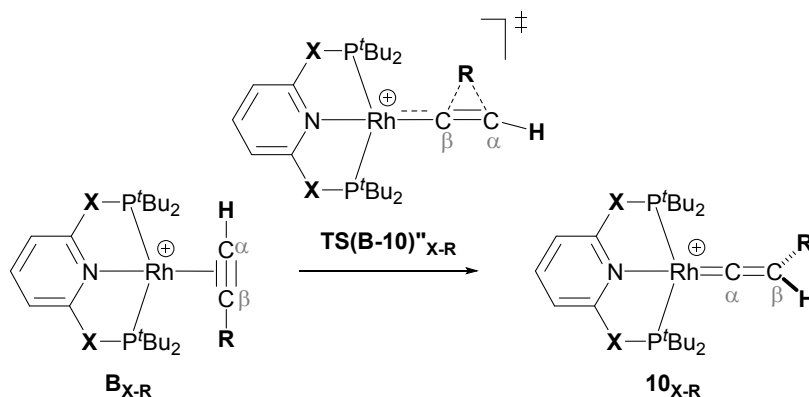

|                                                          | $\Delta E_{BS1}$ | $\Delta H_{BS1}$ | $\Delta G_{BS1}$ | $\Delta G_{BS1/DFB}$ | $\Delta G_{BS1/DFB+D3}$ | $\Delta E_{BS2}$ | $\Delta G_{DFB}$ | $\Delta G_{FB}$ |
|----------------------------------------------------------|------------------|------------------|------------------|----------------------|-------------------------|------------------|------------------|-----------------|
| <b>9</b> <sub>X</sub> + <b>HC≡CR</b>                     | 0.0              | 0.0              | 0.0              | 0.0                  | 0.0                     | 0.0              | <b>0.0</b>       | 0.0             |
| <b>B</b> <sub>C-<sup>t</sup>Bu</sub>                     | -38.0            | -37.7            | -38.2            | -7.5                 | -1.9                    | -36.3            | <b>-0.2</b>      | -3.7            |
| <b>TS(B-10)</b> <sup>‡</sup> <sub>C-<sup>t</sup>Bu</sub> | 5.3              | 3.8              | 3.6              | 34.4                 | 39.6                    | 6.3              | <b>40.6</b>      | 37.2            |
| <b>B</b> <sub>C-Ar</sub>                                 | -47.6            | -48.0            | -48.9            | -16.7                | -13.7                   | -46.5            | <b>-12.6</b>     | -16.1           |
| <b>TS(B-10)</b> <sup>‡</sup> <sub>C-Ar</sub>             | -5.8             | -7.6             | -7.9             | 25.0                 | 28.1                    | -4.2             | <b>29.8</b>      | 26.1            |
| <b>B</b> <sub>O-<sup>t</sup>Bu</sub>                     | -41.1            | -41.6            | -42.7            | -9.8                 | -5.5                    | -39.2            | <b>-3.7</b>      | -7.7            |
| <b>TS(B-10)</b> <sup>‡</sup> <sub>O-<sup>t</sup>Bu</sub> | 2.4              | 0.9              | 0.4              | 32.7                 | 37.3                    | 4.0              | <b>38.9</b>      | 35.0            |
| <b>B</b> <sub>O-Ar</sub>                                 | -47.8            | -48.2            | -49.4            | -14.4                | -12.6                   | -46.2            | <b>-11.0</b>     | -15.3           |
| <b>TS(B-10)</b> <sup>‡</sup> <sub>O-Ar</sub>             | -8.9             | -11.1            | -12.4            | 22.5                 | 24.7                    | -7.2             | <b>26.4</b>      | 22.2            |

**Table S4** – DFT calculated free energies in kcal mol<sup>-1</sup> for transfer of the R group onto the Rh in **10**<sub>X-Ar</sub> via **TS(10-F)**<sub>X-R</sub> to give the Rh—R species **F**<sub>X-Ar</sub>. Free energies are reported with respect to **9**<sub>X</sub> and HC≡CAr' (X = CH<sub>2</sub> and O).

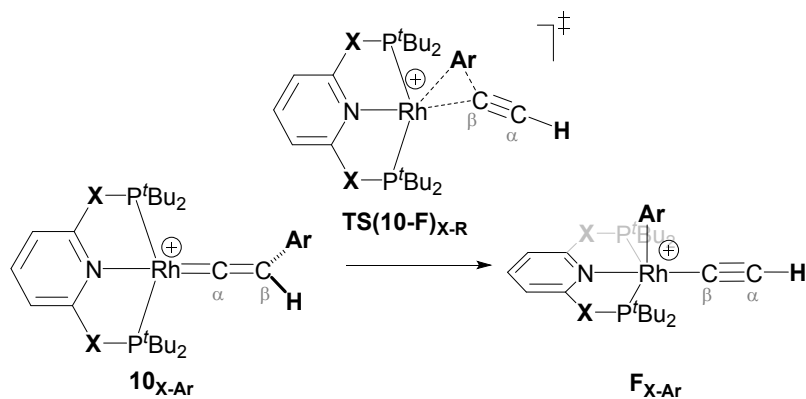

|                                 | $\Delta E_{BS1}$ | $\Delta H_{BS1}$ | $\Delta G_{BS1}$ | $\Delta G_{BS1/DFB}$ | $\Delta G_{BS1/DFB+D3}$ | $\Delta E_{BS2}$ | $\Delta G_{DFB}$ | $\Delta G_{FB}$ |
|---------------------------------|------------------|------------------|------------------|----------------------|-------------------------|------------------|------------------|-----------------|
| <b>9</b> <sub>X</sub> + HC≡CAr' | 0.0              | 0.0              | 0.0              | 0.0                  | 0.0                     | 0.0              | <b>0.0</b>       | 0.0             |
| <b>B</b> <sub>C-Ar</sub>        | -47.6            | -48.0            | -48.9            | -16.7                | -13.7                   | -46.5            | <b>-12.6</b>     | -16.1           |
| <b>10</b> <sub>C-tBu</sub>      | -52.3            | -52.4            | -53.9            | -27.0                | -17.1                   | -50.6            | <b>-12.1</b>     | -15.5           |
| <b>TS(10-F)</b> <sub>C-Ar</sub> | +6.8             | +5.1             | +6.1             | +37.6                | +32.6                   | +6.9             | <b>32.7</b>      | +29.3           |
| <b>F</b> <sub>C-Ar</sub>        | -19.9            | -20.9            | -20.3            | +9.1                 | +1.2                    | -19.9            | <b>+1.1</b>      | -1.8            |
| <b>B</b> <sub>O-Ar</sub>        | -47.8            | -48.2            | -49.4            | -14.4                | -12.6                   | -46.2            | <b>-11.0</b>     | -15.3           |
| <b>10</b> <sub>O-Ar</sub>       | -51.1            | -51.5            | -54.5            | -20.5                | -12.6                   | -49.4            | <b>-10.9</b>     | -15.0           |
| <b>TS(10-F)</b> <sub>O-Ar</sub> | +10.5            | +9.0             | +9.7             | +44.3                | +38.3                   | +11.2            | <b>+39.0</b>     | +34.9           |
| <b>F</b> <sub>O-Ar</sub>        | -15.9            | -16.9            | -16.7            | +16.8                | +7.4                    | -15.2            | <b>+8.1</b>      | +4.2            |

**Table S5** – DFT calculated free energies in kcal mol<sup>-1</sup> for transfer of the R group onto the Rh in **B**<sub>X-tBu</sub> via **TS(B-F)**<sub>X-tBu</sub> to give the Rh-tBu species **F**<sub>X-tBu</sub>. Free energies are reported with respect to **9**<sub>X</sub> and HC≡C<sup>t</sup>Bu (X = CH<sub>2</sub> and O).

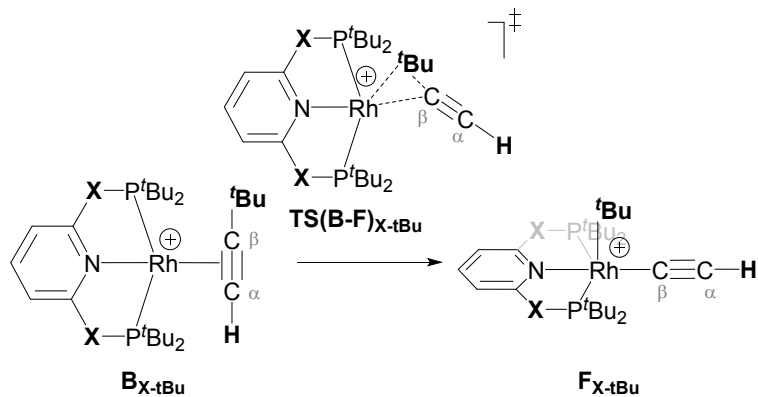

|                                              | $\Delta E_{\text{BS1}}$ | $\Delta H_{\text{BS1}}$ | $\Delta G_{\text{BS1}}$ | $\Delta G_{\text{BS1/DFB}}$ | $\Delta G_{\text{BS1/DFB+D3}}$ | $\Delta E_{\text{BS2}}$ | $\Delta G_{\text{DFB}}$ | $\Delta G_{\text{FB}}$ |
|----------------------------------------------|-------------------------|-------------------------|-------------------------|-----------------------------|--------------------------------|-------------------------|-------------------------|------------------------|
| <b>9</b> <sub>X</sub> + HC≡C <sup>t</sup> Bu | 0.0                     | 0.0                     | 0.0                     | 0.0                         | 0.0                            | 0.0                     | <b>0.0</b>              | 0.0                    |
| <b>B</b> <sub>C-tBu</sub>                    | -38.0                   | -37.7                   | -38.2                   | -7.5                        | -1.9                           | -36.3                   | <b>-0.2</b>             | -3.7                   |
| <b>TS(B-F)</b> <sub>C-tBu</sub>              | 16.7                    | 15.1                    | 15.4                    | 46.1                        | 46.1                           | 17.1                    | <b>46.6</b>             | 43.1                   |
| <b>F</b> <sub>C-tBu</sub>                    | 4.6                     | 4.1                     | 4.4                     | 33.8                        | 32.0                           | 5.4                     | <b>32.8</b>             | 29.7                   |
| <b>B</b> <sub>O-tBu</sub>                    | -41.1                   | -41.6                   | -42.7                   | -9.8                        | -5.5                           | -39.2                   | <b>-3.7</b>             | -7.7                   |
| <b>TS(B-F)</b> <sub>O-tBu</sub>              | 16.4                    | 15.0                    | 14.9                    | 47.9                        | 47.2                           | 17.0                    | <b>47.8</b>             | 43.8                   |
| <b>F</b> <sub>O-tBu</sub>                    | 5.7                     | 5.0                     | 5.0                     | 37.4                        | 34.3                           | 7.3                     | <b>35.9</b>             | 32.0                   |



**Table S6** – The P—Rh—P bite angles ( $\theta$ , in degrees) in species **A<sub>X</sub>**, **B<sub>X-R</sub>** and **10<sub>X-R</sub>** (X = CH<sub>2</sub> and O, R = <sup>t</sup>Bu and Ar’).

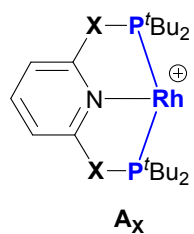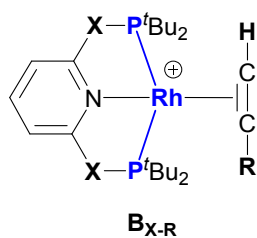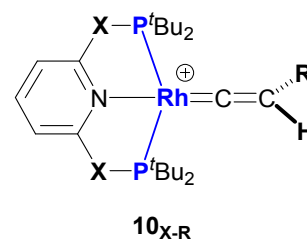

| Species                   | P—Rh—P | Species                   | P—Rh—P | Species                  | P—Rh—P | Species                  | P—Rh—P |
|---------------------------|--------|---------------------------|--------|--------------------------|--------|--------------------------|--------|
| <b>A<sub>C</sub></b>      | 171.1  | <b>A<sub>O</sub></b>      | 166.0  | <b>A<sub>C</sub></b>     | 171.1  | <b>A<sub>O</sub></b>     | 166.0  |
| <b>B<sub>C-tBu</sub></b>  | 161.1  | <b>B<sub>O-tBu</sub></b>  | 162.5  | <b>B<sub>C-Ar</sub></b>  | 163.4  | <b>B<sub>O-Ar</sub></b>  | 162.5  |
| <b>10<sub>C-tBu</sub></b> | 166.3  | <b>10<sub>O-tBu</sub></b> | 162.9  | <b>10<sub>C-Ar</sub></b> | 166.7  | <b>10<sub>O-Ar</sub></b> | 163.0  |

**Table S7** – The HOMOs (in eV) of **A<sub>X</sub>**, **B<sub>X-R</sub>** and **10<sub>X-R</sub>** (X = CH<sub>2</sub> and O, R = <sup>t</sup>Bu and Ar).

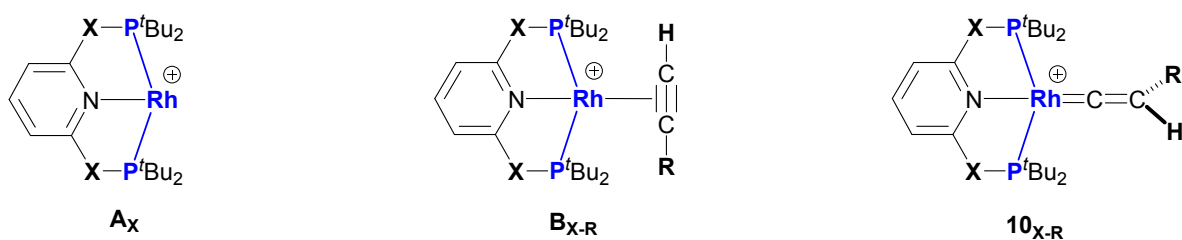

| Species                   | HOMO  | Species                   | HOMO  | Species                  | HOMO  | Species                  | HOMO  |
|---------------------------|-------|---------------------------|-------|--------------------------|-------|--------------------------|-------|
| <b>A<sub>C</sub></b>      | -7.03 | <b>A<sub>O</sub></b>      | -7.38 | <b>A<sub>C</sub></b>     | -7.03 | <b>A<sub>O</sub></b>     | -7.38 |
| <b>B<sub>C-tBu</sub></b>  | -7.05 | <b>B<sub>O-tBu</sub></b>  | -7.54 | <b>B<sub>C-Ar</sub></b>  | -6.87 | <b>B<sub>O-Ar</sub></b>  | -7.30 |
| <b>10<sub>C-tBu</sub></b> | -7.31 | <b>10<sub>O-tBu</sub></b> | -7.65 | <b>10<sub>C-Ar</sub></b> | -6.97 | <b>10<sub>O-Ar</sub></b> | -7.23 |

**Table S8** – The P—Rh—P bite angles ( $\theta$ , in degrees) in species **A<sub>X</sub>**, **B<sub>X-R</sub>** and **10<sub>X-R</sub>** (X = NH, CH<sub>2</sub>, O and S).

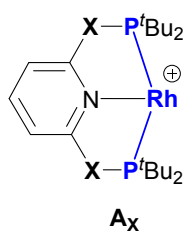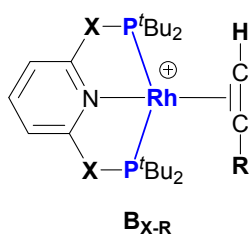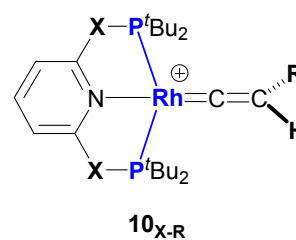

| Species                  | P—Rh—P | Species                  | P—Rh—P | Species                   | P—Rh—P | Species                  | P—Rh—P |
|--------------------------|--------|--------------------------|--------|---------------------------|--------|--------------------------|--------|
| <b>A<sub>C</sub></b>     | 171.1  | <b>A<sub>O</sub></b>     | 166.0  | <b>A<sub>NH</sub></b>     | 169.0  | <b>A<sub>S</sub></b>     | 178.8  |
| <b>B<sub>C-Ar</sub></b>  | 163.4  | <b>B<sub>O-Ar</sub></b>  | 162.5  | <b>B<sub>NH-Ar</sub></b>  | 169.9  | <b>B<sub>S-Ar</sub></b>  | 167.5  |
| <b>10<sub>C-Ar</sub></b> | 166.7  | <b>10<sub>O-Ar</sub></b> | 163.0  | <b>10<sub>NH-Ar</sub></b> | 165.8  | <b>10<sub>S-Ar</sub></b> | 176.4  |

**Table S9** – The HOMOs (in eV) of **A<sub>X</sub>**, **B<sub>X-Ar</sub>** and **10<sub>X-Ar</sub>** (X = CH<sub>2</sub> and NH, O and S).

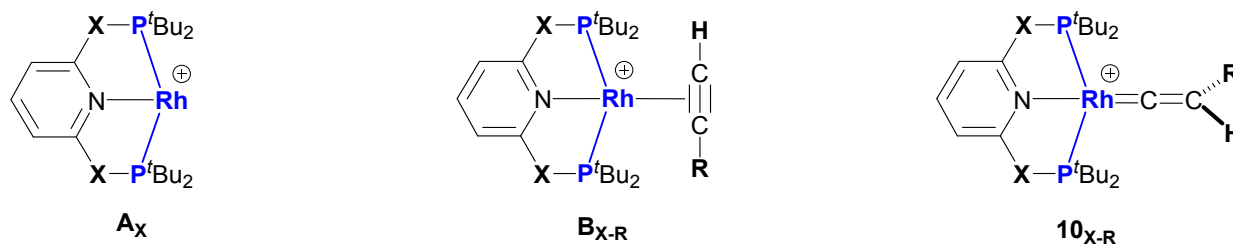

| Species                  | HOMO  | Species                  | HOMO  | Species                  | HOMO  | Species                   | HOMO  |
|--------------------------|-------|--------------------------|-------|--------------------------|-------|---------------------------|-------|
| <b>A<sub>C</sub></b>     | -7.03 | <b>A<sub>O</sub></b>     | -7.38 | <b>A<sub>S</sub></b>     | -7.25 | <b>A<sub>NH</sub></b>     | -7.00 |
| <b>B<sub>C-Ar</sub></b>  | -6.87 | <b>B<sub>O-Ar</sub></b>  | -7.30 | <b>B<sub>S-Ar</sub></b>  | -7.25 | <b>B<sub>NH-Ar</sub></b>  | -7.01 |
| <b>10<sub>C-Ar</sub></b> | -6.97 | <b>10<sub>O-Ar</sub></b> | -7.24 | <b>10<sub>S-Ar</sub></b> | -7.31 | <b>10<sub>NH-Ar</sub></b> | -7.04 |

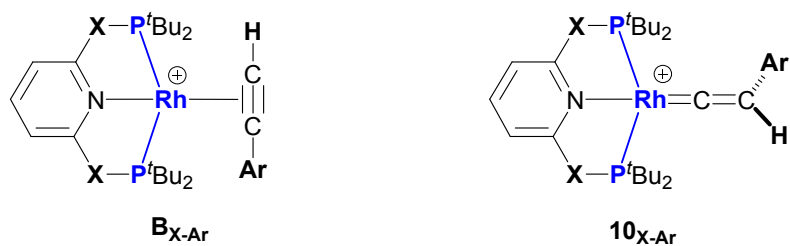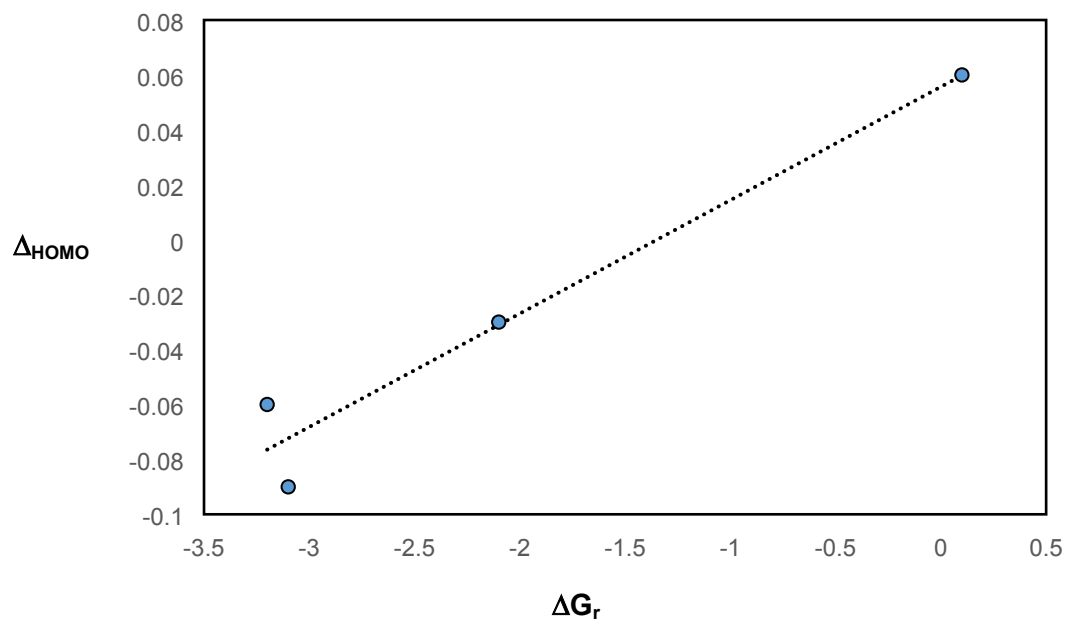

**Figure S1** – Plot of the difference between the free energies of  $\text{B}_{\text{X-Ar}}$  and  $10_{\text{X-Ar}}$  ( $\Delta G_r$ , in kcal mol<sup>-1</sup>) and difference between the HOMOs of  $\text{B}_{\text{X-Ar}}$  and  $10_{\text{X-Ar}}$  ( $\Delta_{\text{HOMO}}$  (in eV); X = NH, CH<sub>2</sub>, O and S).

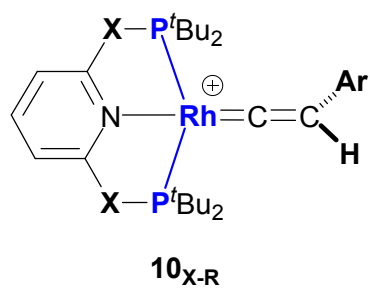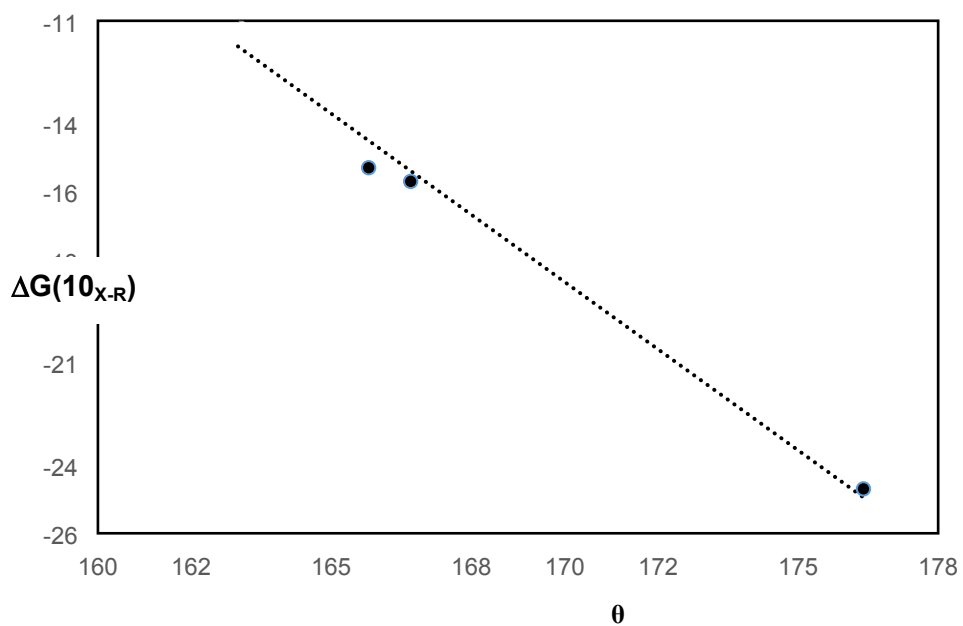

**Figure S2** – Plot of the relative free energy of  $10_{X-R}$  with respect to  $B_{X-R}$  ( $\Delta G$ , in kcal mol<sup>-1</sup>,) vs the P–Rh–P bite angle of  $10_{X-R}$  ( $\theta$  (in degrees); X = NH, CH<sub>2</sub>, O and S).

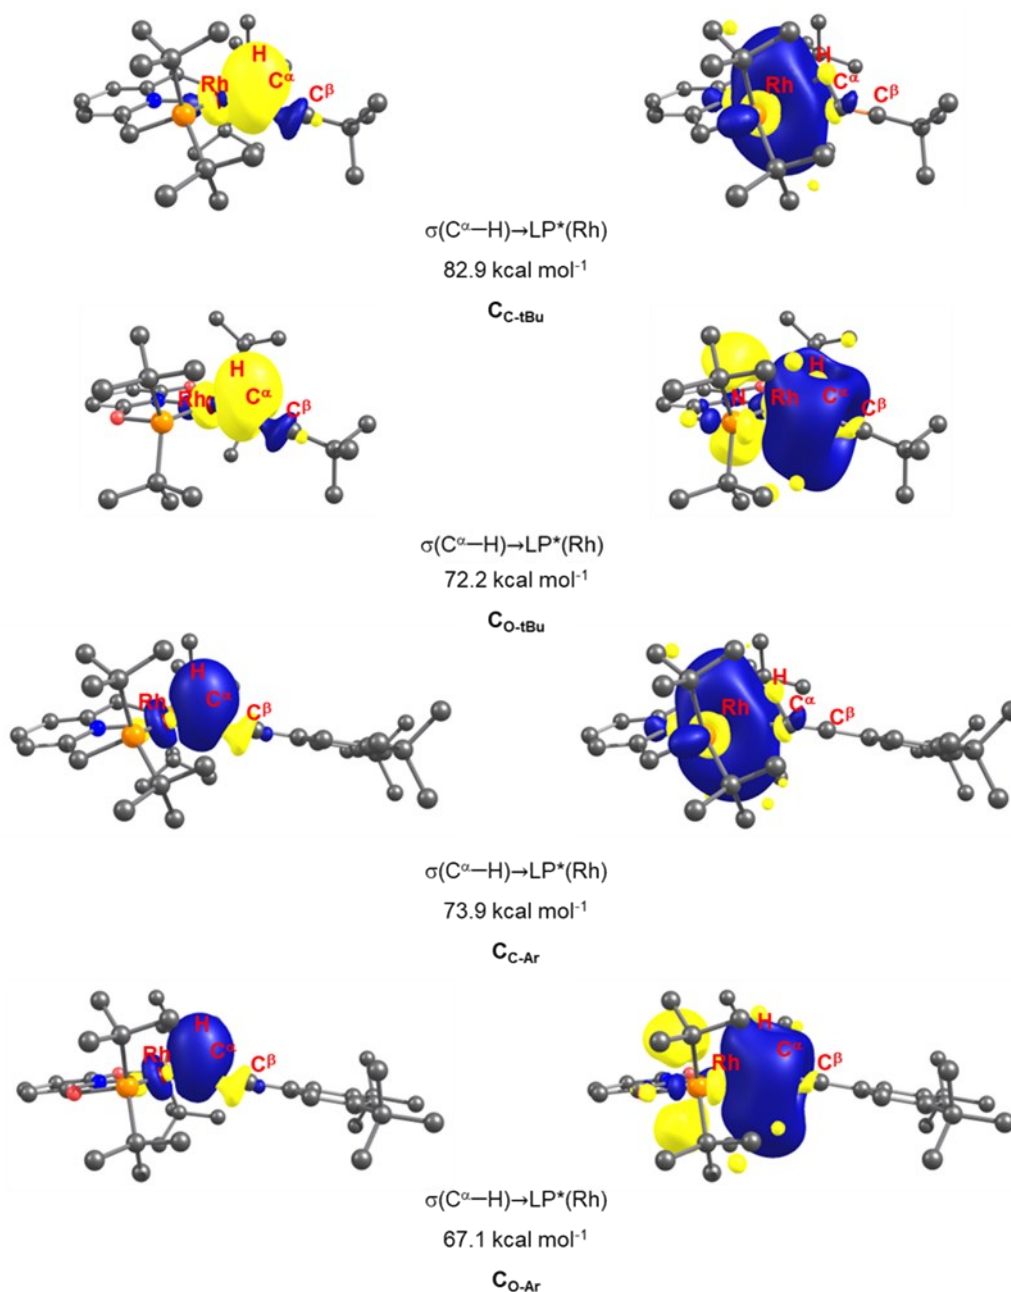

Figure S3. NBO donor-acceptor interactions derived from second-order perturbation theory, showing the interactions between the  $\text{C}^\alpha\text{-H}$  bonding orbital (left) and an empty Rh orbital ( $\text{LP}^*$ , right) in  $\text{C}_{\text{X-R}}$  with the stabilisation energies (in kcal mol<sup>-1</sup>).

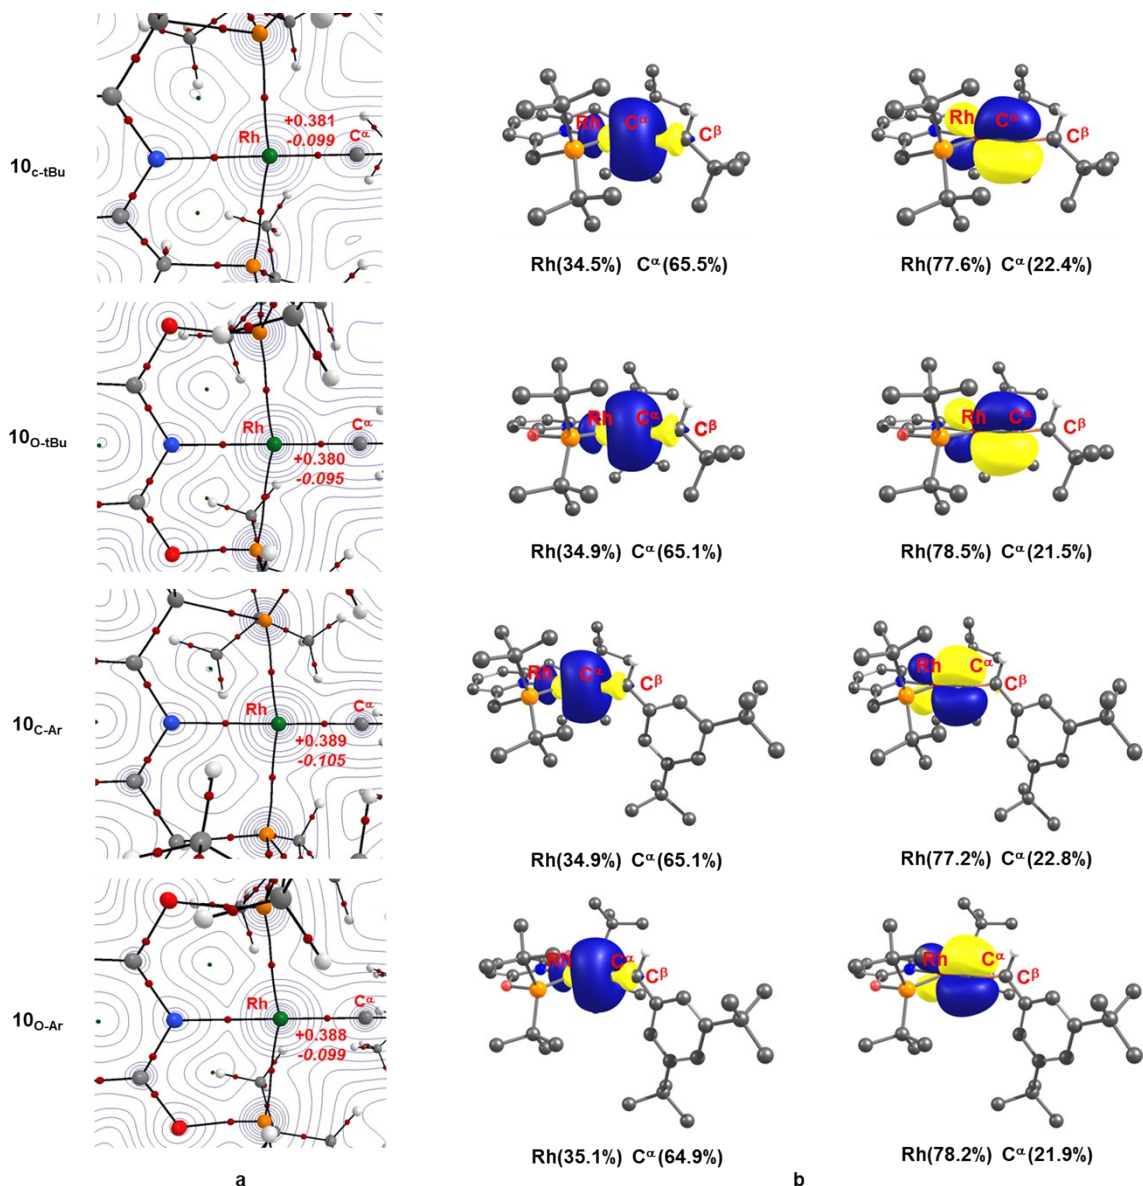

Figure S4. (a) QTAIM molecular graph of  $10_{x-R}$ ; the electron density contours are computed in the  $\{Rh/P/C^\alpha\}$  plane with bond critical points (BCPs) shown as small red spheres; for the Rh—C $^\alpha$  BCP, the Laplacian of the electron density ( $\nabla^2\rho(r)$  in eÅ<sup>-5</sup>) is shown in plain and total energy densities ( $H(r)$  in a.u.) is shown in italic; (b) NBO  $\sigma$ - and  $\pi$ - bonding orbitals of the Rh—C $^\alpha$  interaction and the contribution of the Rh and C $^\alpha$  centres in the corresponding interactions in  $10_{x-R}$ .



**Cartesian Coordinates and Computed Energies (in Hartrees)**

**9c**

SCF (BP86) Energy = -2473.63991160  
 Enthalpy 0K = -2472.254901  
 Enthalpy 298K = -2472.173582  
 Free Energy 298K = -2472.365403  
 Lowest Frequency = 7.6621 cm<sup>-1</sup>  
 Second Frequency = 14.0646 cm<sup>-1</sup>  
 SCF (BP86-D3BJ) Energy = -  
 2474.111384  
 SCF (FB) Energy = -2473.763495  
 SCF (DFB) Energy = -2473.78008  
 SCF (BS2) Energy = -3812.790739

|    |          |          |          |
|----|----------|----------|----------|
| Rh | 2.70768  | -2.09034 | 1.15331  |
| P  | 4.14307  | -2.74359 | -0.61842 |
| P  | 1.82376  | -1.84213 | 3.41662  |
| N  | 4.02373  | -3.47044 | 2.23615  |
| C  | 1.11905  | -1.47635 | -0.23631 |
| H  | 1.43377  | -1.92392 | -1.18720 |
| C  | 1.84738  | -0.32656 | 0.16302  |
| H  | 2.64532  | -0.01583 | -0.52382 |
| C  | 1.26907  | 0.86581  | 0.90858  |
| H  | 2.09724  | 1.49017  | 1.28802  |
| H  | 0.68662  | 0.54923  | 1.78817  |
| C  | -0.35043 | -1.73662 | 0.03443  |
| H  | -0.60610 | -1.52407 | 1.08418  |
| H  | -0.56427 | -2.80826 | -0.12871 |
| C  | 5.23812  | -3.84529 | 1.72348  |
| C  | 6.10940  | -4.69678 | 2.42265  |
| H  | 7.06908  | -4.96522 | 1.97274  |
| C  | 5.74636  | -5.17927 | 3.68355  |
| H  | 6.41464  | -5.83950 | 4.24421  |
| C  | 4.50590  | -4.80210 | 4.20831  |
| H  | 4.17240  | -5.16657 | 5.18352  |
| C  | 3.66495  | -3.95766 | 3.46616  |
| C  | 5.63597  | -3.29315 | 0.38766  |
| H  | 6.26484  | -4.01267 | -0.16262 |
| H  | 6.24845  | -2.38598 | 0.53903  |
| C  | 2.31108  | -3.58168 | 3.97282  |
| H  | 2.24554  | -3.71677 | 5.06339  |
| H  | 1.56306  | -4.24712 | 3.50734  |
| C  | 3.61789  | -4.37599 | -1.55684 |
| C  | 3.39912  | -5.44983 | -0.46497 |
| H  | 4.33686  | -5.75121 | 0.03020  |
| H  | 2.97785  | -6.35432 | -0.93995 |
| H  | 2.68727  | -5.10724 | 0.30555  |
| C  | 4.67170  | -4.87977 | -2.56405 |
| H  | 4.73144  | -4.24288 | -3.46044 |
| H  | 4.37651  | -5.88894 | -2.90473 |
| H  | 5.68131  | -4.97054 | -2.13024 |
| C  | 2.27406  | -4.16052 | -2.28844 |
| H  | 1.45552  | -3.96366 | -1.57803 |
| H  | 2.01849  | -5.08554 | -2.83652 |
| H  | 2.31036  | -3.34416 | -3.02805 |
| C  | 5.01237  | -1.45755 | -1.80206 |
| C  | 5.37781  | -0.22422 | -0.93825 |
| H  | 4.52449  | 0.18496  | -0.37731 |
| H  | 5.76526  | 0.56942  | -1.60248 |
| H  | 6.17793  | -0.44566 | -0.21174 |
| C  | 4.03155  | -1.04928 | -2.92057 |
| H  | 3.82644  | -1.88217 | -3.61276 |

|    |          |          |          |
|----|----------|----------|----------|
| H  | 4.47943  | -0.23343 | -3.51694 |
| H  | 3.07028  | -0.68280 | -2.52511 |
| C  | 6.32083  | -1.98400 | -2.43743 |
| H  | 7.06057  | -2.30868 | -1.68788 |
| H  | 6.78594  | -1.15491 | -3.00163 |
| H  | 6.15948  | -2.80729 | -3.14584 |
| C  | 0.00514  | -1.83534 | 4.16815  |
| C  | -0.74455 | -3.05619 | 3.57666  |
| H  | -0.61687 | -3.15227 | 2.48580  |
| H  | -1.82522 | -2.94096 | 3.77674  |
| H  | -0.43835 | -4.00448 | 4.04684  |
| C  | -0.75716 | -0.55186 | 3.77795  |
| H  | -0.26729 | 0.36559  | 4.13565  |
| H  | -1.76096 | -0.58982 | 4.23854  |
| H  | -0.90038 | -0.46580 | 2.68932  |
| C  | -0.00126 | -1.95593 | 5.70917  |
| H  | 0.55020  | -2.83574 | 6.07786  |
| H  | -1.04820 | -2.07444 | 6.04465  |
| H  | 0.39682  | -1.05917 | 6.20865  |
| C  | 2.98876  | -0.66573 | 4.47583  |
| C  | 4.27304  | -0.43326 | 3.64272  |
| H  | 4.88446  | -1.34532 | 3.55859  |
| H  | 4.89064  | 0.33387  | 4.14575  |
| H  | 4.04333  | -0.08283 | 2.62064  |
| C  | 3.38773  | -1.27383 | 5.83729  |
| H  | 2.52877  | -1.47047 | 6.49581  |
| H  | 4.04441  | -0.55744 | 6.36409  |
| H  | 3.96352  | -2.20702 | 5.72267  |
| C  | 2.30529  | 0.70208  | 4.69531  |
| H  | 3.03562  | 1.39079  | 5.15747  |
| H  | 1.44403  | 0.64297  | 5.37887  |
| H  | 1.97651  | 1.16243  | 3.74883  |
| C  | -1.11905 | 1.47635  | 0.23631  |
| H  | -1.43377 | 1.92392  | 1.18720  |
| C  | -1.84738 | 0.32656  | -0.16302 |
| H  | -2.64532 | 0.01583  | 0.52382  |
| C  | -1.26907 | -0.86581 | -0.90858 |
| H  | -2.09724 | -1.49017 | -1.28802 |
| H  | -0.68662 | -0.54923 | -1.78817 |
| C  | 0.35043  | 1.73662  | -0.03443 |
| H  | 0.60610  | 1.52407  | -1.08418 |
| H  | 0.56427  | 2.80826  | 0.12871  |
| Rh | -2.70768 | 2.09034  | -1.15331 |
| P  | -4.14307 | 2.74359  | 0.61842  |
| P  | -1.82376 | 1.84213  | -3.41662 |
| N  | -4.02373 | 3.47044  | -2.23615 |
| C  | -5.23812 | 3.84529  | -1.72348 |
| C  | -6.10940 | 4.69678  | -2.42265 |
| H  | -7.06908 | 4.96522  | -1.97274 |
| C  | -5.74636 | 5.17927  | -3.68355 |
| H  | -6.41464 | 5.83950  | -4.24421 |
| C  | -4.50590 | 4.80210  | -4.20831 |
| H  | -4.17240 | 5.16657  | -5.18352 |
| C  | -3.66495 | 3.95766  | -3.46616 |
| C  | -5.63597 | 3.29315  | -0.38766 |
| H  | -6.26484 | 4.01267  | 0.16262  |
| H  | -6.24845 | 2.38598  | -0.53903 |
| C  | -2.31108 | 3.58168  | -3.97282 |
| H  | -2.24554 | 3.71677  | -5.06339 |
| H  | -1.56306 | 4.24712  | -3.50734 |
| C  | -3.61789 | 4.37599  | 1.55684  |
| C  | -3.39912 | 5.44983  | 0.46497  |
| H  | -4.33686 | 5.75121  | -0.03020 |
| H  | -2.97785 | -6.35432 | 0.93995  |

|   |          |          |          |    |          |          |          |
|---|----------|----------|----------|----|----------|----------|----------|
| H | -2.68727 | 5.10724  | -0.30555 | C  | 2.57506  | 4.50396  | -0.82070 |
| C | -4.67170 | 4.87977  | 2.56405  | H  | 3.37973  | 4.89938  | -1.45446 |
| H | -4.73144 | 4.24288  | 3.46044  | C  | 1.29403  | 4.13313  | -1.54417 |
| H | -4.37651 | 5.88894  | 2.90473  | H  | 1.33329  | 4.53883  | -2.56899 |
| H | -5.68131 | 4.97054  | 2.13024  | H  | 0.42448  | 4.61783  | -1.05717 |
| C | -2.27406 | 4.16052  | 2.28844  | C  | 1.90801  | 3.85388  | 1.57618  |
| H | -1.45552 | 3.96366  | 1.57803  | H  | 0.93032  | 4.37375  | 1.53194  |
| H | -2.01849 | 5.08554  | 2.83652  | H  | 2.33511  | 4.09486  | 2.56415  |
| H | -2.31036 | 3.34416  | 3.02805  | C  | 0.05142  | 2.14729  | -0.55439 |
| C | -5.01237 | 1.45755  | 1.80206  | H  | -0.97196 | 2.46056  | -0.80546 |
| C | -5.37781 | 0.22422  | 0.93825  | C  | 0.32868  | 2.00572  | 0.82838  |
| H | -4.52449 | -0.18496 | 0.37731  | H  | -0.50864 | 2.20235  | 1.51185  |
| H | -5.76526 | -0.56942 | 1.60248  | C  | 1.66116  | 2.30542  | 1.48961  |
| H | -6.17793 | 0.44566  | 0.21174  | H  | 1.65797  | 1.87404  | 2.50686  |
| C | -4.03155 | 1.04928  | 2.92057  | H  | 2.49678  | 1.84019  | 0.94540  |
| H | -3.82644 | 1.88217  | 3.61276  | C  | 1.03405  | 2.58561  | -1.61851 |
| H | -4.47943 | 0.23343  | 3.51694  | H  | 1.99254  | 2.05609  | -1.52102 |
| H | -3.07028 | 0.68280  | 2.52511  | H  | 0.62382  | 2.32516  | -2.61128 |
| C | -6.32083 | 1.98400  | 2.43743  | Rh | -0.16282 | 0.04177  | 0.01916  |
| H | -7.06057 | 2.30868  | 1.68788  | P  | -2.50575 | 0.26510  | 0.11932  |
| H | -6.78594 | 1.15491  | 3.00163  | P  | 2.04905  | -0.97459 | -0.08797 |
| H | -6.15948 | 2.80729  | 3.14584  | N  | -0.72296 | -2.05381 | -0.06666 |
| C | -0.00514 | 1.83534  | -4.16815 | C  | -1.96264 | -2.45921 | 0.35692  |
| C | 0.74455  | 3.05619  | -3.57666 | C  | -2.35929 | -3.80430 | 0.29425  |
| H | 0.61687  | 3.15227  | -2.48580 | H  | -3.35634 | -4.08633 | 0.64301  |
| H | 1.82522  | 2.94096  | -3.77674 | C  | -1.46750 | -4.76614 | -0.19473 |
| H | 0.43835  | 4.00448  | -4.04684 | H  | -1.75673 | -5.82017 | -0.24454 |
| C | 0.75716  | 0.55186  | -3.77795 | C  | -0.20051 | -4.35325 | -0.62008 |
| H | 0.26729  | -0.36559 | -4.13565 | H  | 0.52180  | -5.07074 | -1.01849 |
| H | 1.76096  | 0.58982  | -4.23854 | C  | 0.14461  | -2.99258 | -0.55577 |
| H | 0.90038  | 0.46580  | -2.68932 | C  | -2.86519 | -1.40496 | 0.92612  |
| C | 0.00126  | 1.95593  | -5.70917 | H  | -3.92321 | -1.70536 | 0.86661  |
| H | -0.55020 | 2.83574  | -6.07786 | H  | -2.61856 | -1.26473 | 1.99321  |
| H | 1.04820  | 2.07444  | -6.04465 | C  | 1.46342  | -2.49553 | -1.05872 |
| H | -0.39682 | 1.05917  | -6.20865 | H  | 2.20802  | -3.30625 | -1.08468 |
| C | -2.98876 | 0.66573  | -4.47583 | H  | 1.33071  | -2.13157 | -2.09275 |
| C | -4.27304 | 0.43326  | -3.64272 | C  | -3.37873 | 0.14936  | -1.62909 |
| H | -4.88446 | 1.34532  | -3.55859 | C  | -2.36809 | -0.52641 | -2.58724 |
| H | -4.89064 | -0.33387 | -4.14575 | H  | -2.17952 | -1.57818 | -2.31801 |
| H | -4.04333 | 0.08283  | -2.62064 | H  | -2.78697 | -0.51602 | -3.61061 |
| C | -3.38773 | 1.27383  | -5.83729 | H  | -1.39860 | 0.00155  | -2.59741 |
| H | -2.52877 | 1.47047  | -6.49581 | C  | -4.67362 | -0.69080 | -1.59974 |
| H | -4.04441 | 0.55744  | -6.36409 | H  | -5.43662 | -0.29025 | -0.91545 |
| H | -3.96352 | 2.20702  | -5.72267 | H  | -5.11407 | -0.69632 | -2.61364 |
| C | -2.30529 | -0.70208 | -4.69531 | H  | -4.47933 | -1.74273 | -1.33184 |
| H | -3.03562 | -1.39079 | -5.15747 | C  | -3.68470 | 1.56520  | -2.16547 |
| H | -1.44403 | -0.64297 | -5.37887 | H  | -2.79357 | 2.21558  | -2.16823 |
| H | -1.97651 | -1.16243 | -3.74883 | H  | -4.02771 | 1.48001  | -3.21265 |
|   |          |          |          | H  | -4.48685 | 2.06858  | -1.60338 |
|   |          |          |          | C  | -3.47086 | 1.47023  | 1.31471  |
|   |          |          |          | C  | -2.92915 | 1.21911  | 2.74504  |
|   |          |          |          | H  | -1.82708 | 1.19247  | 2.78631  |
|   |          |          |          | H  | -3.26997 | 2.03896  | 3.40234  |
|   |          |          |          | H  | -3.31308 | 0.28238  | 3.18177  |
|   |          |          |          | C  | -3.20652 | 2.94740  | 0.93629  |
|   |          |          |          | H  | -3.56625 | 3.20230  | -0.07084 |
|   |          |          |          | H  | -3.74994 | 3.59334  | 1.64974  |
|   |          |          |          | H  | -2.14130 | 3.21698  | 1.00073  |
|   |          |          |          | C  | -4.99333 | 1.21111  | 1.30638  |
|   |          |          |          | H  | -5.25019 | 0.16249  | 1.53149  |
|   |          |          |          | H  | -5.46158 | 1.83389  | 2.09076  |
|   |          |          |          | H  | -5.46351 | 1.48990  | 0.35026  |
| C | 2.83461  | 4.38591  | 0.49869  | C  | 3.64386  | -0.55641 | -1.16758 |
| H | 3.83161  | 4.69329  | 0.84081  | C  | 3.16178  | -0.35307 | -2.62664 |

**8**

SCF (BP86) Energy = -1392.85822202  
 Enthalpy 0K = -1392.077791  
 Enthalpy 298K = -1392.033095  
 Free Energy 298K = -1392.148433  
 Lowest Frequency = 23.4026 cm<sup>-1</sup>  
 Second Frequency = 38.6423 cm<sup>-1</sup>  
 SCF (BP86-D3BJ) Energy = -  
 1393.106437  
 SCF (FB) Energy = -1392.899301  
 SCF (DFB) Energy = -1392.90509  
 SCF (BS2) Energy = -2062.471272

H 2.27594 0.29862 -2.69870  
H 3.97302 0.12437 -3.20513  
H 2.93398 -1.30712 -3.12991  
C 4.33956 0.73695 -0.68593  
H 4.69640 0.66990 0.35211  
H 5.22546 0.91227 -1.32358  
H 3.70369 1.63140 -0.77146  
C 4.68067 -1.70261 -1.14987  
H 4.26020 -2.67365 -1.45890  
H 5.48157 -1.45760 -1.87177  
H 5.16189 -1.82565 -0.16714  
C 2.59242 -1.72774 1.64579  
C 1.35254 -1.67019 2.57083  
H 0.55592 -2.35536 2.24010  
H 1.65298 -1.97620 3.59040  
H 0.92454 -0.65419 2.62111  
C 3.06412 -3.19416 1.54399  
H 3.93713 -3.32426 0.88685  
H 3.35945 -3.54063 2.55150  
H 2.26112 -3.86655 1.19880  
C 3.70814 -0.86928 2.28166  
H 3.88464 -1.22860 3.31198  
H 4.66563 -0.95078 1.74432  
H 3.43200 0.19522 2.34989

**HCctBu**

SCF (BP86) Energy = -234.586240585  
Enthalpy 0K = -234.449584  
Enthalpy 298K = -234.440795  
Free Energy 298K = -234.480158  
Lowest Frequency = 169.3417 cm<sup>-1</sup>  
Second Frequency = 169.4574 cm<sup>-1</sup>  
SCF (BP86-D3BJ) Energy = -  
234.6063448  
SCF (FB) Energy = -234.5884013  
SCF (DFB) Energy = -234.5888902  
SCF (BS2) Energy = -234.647662

C 2.39701 0.00001 0.00004  
H 3.47016 -0.00003 0.00003  
C 1.17635 0.00003 0.00005  
C -0.29938 0.00002 0.00004  
C -0.81204 1.24798 0.76779  
C -0.81201 -1.28898 0.69686  
H -0.45850 -2.18995 0.16902  
H -0.45806 -1.34117 1.73961  
H -1.91621 -1.29967 0.70297  
H -0.45855 1.24157 1.81198  
H -1.91624 1.25862 0.77405  
H -0.45817 2.17711 0.29151  
C -0.81192 0.04094 -1.46473  
H -0.45806 -0.83615 -2.03114  
H -1.91612 0.04120 -1.47711  
H -0.45825 0.94842 -1.98121

**Ac**

SCF (BP86) Energy = -1080.79612092  
Enthalpy 0K = -1080.194471  
Enthalpy 298K = -1080.158071  
Free Energy 298K = -1080.258904  
Lowest Frequency = 24.9345 cm<sup>-1</sup>  
Second Frequency = 28.1670 cm<sup>-1</sup>  
SCF (BP86-D3BJ) Energy = -  
1080.977565

SCF (FB) Energy = -1080.844237  
SCF (DFB) Energy = -1080.851914  
SCF (BS2) Energy = -1750.339368

Rh -0.00020 -0.43189 0.00068  
P -2.31385 -0.25110 -0.13326  
P 2.31373 -0.25129 0.13349  
N -0.00013 1.55263 0.00051  
C -1.12436 2.25687 -0.39461  
C -1.13732 3.65867 -0.38500  
H -2.04758 4.17598 -0.70027  
C 0.00035 4.37570 -0.00005  
H 0.00052 5.46918 -0.00025  
C 1.13778 3.65846 0.38520  
H 2.04821 4.17559 0.70027  
C 1.12434 2.25666 0.39536  
C -2.32245 1.48182 -0.88088  
H -3.25133 2.04940 -0.70831  
H -2.22842 1.33103 -1.97068  
C 2.32205 1.48131 0.88195  
H 3.25110 2.04899 0.71062  
H 2.22702 1.32963 1.97155  
C -3.34269 -0.09742 1.49588  
C -2.48842 0.77891 2.44301  
H -2.36653 1.80802 2.06347  
H -2.99607 0.84822 3.42228  
H -1.48460 0.34859 2.59964  
C -4.72341 0.56358 1.30128  
H -5.39354 -0.02048 0.65419  
H -5.21453 0.65376 2.28742  
H -4.64764 1.58470 0.89125  
C -3.50271 -1.50189 2.11851  
H -2.53101 -2.01150 2.24027  
H -3.95204 -1.40207 3.12307  
H -4.16934 -2.15157 1.52828  
C -3.10274 -1.44681 -1.43138  
C -2.50228 -1.08849 -2.81094  
H -1.40455 -0.96504 -2.76181  
H -2.71744 -1.90958 -3.51814  
H -2.94464 -0.17326 -3.23914  
C -2.60900 -2.86214 -1.04083  
H -2.96968 -3.18473 -0.05162  
H -2.97223 -3.59514 -1.78368  
H -1.50365 -2.91710 -1.04205  
C -4.64069 -1.41435 -1.51106  
H -5.02709 -0.40506 -1.73124  
H -4.97279 -2.07796 -2.33055  
H -5.11821 -1.77848 -0.58743  
C 3.10428 -1.44695 1.43060  
C 2.50430 -1.08963 2.81063  
H 1.40647 -0.96686 2.76220  
H 2.72033 -1.91092 3.51735  
H 2.94631 -0.17431 3.23900  
C 2.61142 -2.86254 1.03978  
H 2.97173 -3.18445 0.05021  
H 2.97575 -3.59553 1.78210  
H 1.50613 -2.91840 1.04168  
C 4.64224 -1.41335 1.50956  
H 5.02802 -0.40380 1.72964  
H 4.97517 -2.07679 2.32885  
H 5.11961 -1.77705 0.58570  
C 3.34130 -0.09665 -1.49639  
C 2.48589 0.77919 -2.44294  
H 2.36379 1.80825 -2.06335

H 2.99281 0.84865 -3.42257  
H 1.48216 0.34836 -2.59876  
C 4.72166 0.56534 -1.30255  
H 5.39261 -0.01830 -0.65592  
H 5.21214 0.65598 -2.28896  
H 4.64536 1.58635 -0.89236  
C 3.50193 -1.50092 -2.11932  
H 3.95051 -1.40062 -3.12417  
H 4.16942 -2.15020 -1.52965  
H 2.53052 -2.01123 -2.24052

**Bc-tBu**

SCF (BP86) Energy = -1315.42848687  
Enthalpy 0K = -1314.686830  
Enthalpy 298K = -1314.641976  
Free Energy 298K = -1314.758068  
Lowest Frequency = 21.0087 cm<sup>-1</sup>  
Second Frequency = 32.1843 cm<sup>-1</sup>  
SCF (BP86-D3BJ) Energy = -  
1315.662926  
SCF (FB) Energy = -1315.469708  
SCF (DFB) Energy = -1315.475431  
SCF (BS2) Energy = -1985.025037

Rh 0.02956 0.15491 0.10794  
P 2.39016 -0.17053 0.01237  
P -2.31358 -0.30501 0.21738  
N 0.08858 -1.93374 -0.41823  
C 1.19585 -2.48121 -1.01430  
C 1.23904 -3.83680 -1.37821  
H 2.13744 -4.23410 -1.85807  
C 0.13058 -4.65520 -1.13343  
H 0.14331 -5.71092 -1.42057  
C -0.98706 -4.10297 -0.49731  
H -1.85931 -4.71681 -0.25738  
C -0.97880 -2.74694 -0.13312  
C 2.35607 -1.56518 -1.26895  
H 3.30249 -2.12626 -1.33390  
H 2.20764 -1.05693 -2.23741  
C -2.09796 -2.13634 0.65203  
H -3.02575 -2.72175 0.56054  
H -1.80699 -2.13697 1.71721  
C 3.10029 -1.00239 1.63004  
C 1.92596 -1.72209 2.33634  
H 1.56459 -2.59100 1.76286  
H 2.27679 -2.09541 3.31624  
H 1.07142 -1.04373 2.50274  
C 4.21034 -2.03762 1.34977  
H 5.08618 -1.61118 0.83987  
H 4.56111 -2.45010 2.31366  
H 3.83981 -2.88981 0.75557  
C 3.62393 0.10562 2.57119  
H 2.86793 0.88873 2.75181  
H 3.87332 -0.34480 3.54909  
H 4.53960 0.58646 2.19319  
C 3.69583 1.03667 -0.77554  
C 3.26869 1.25231 -2.24846  
H 2.18266 1.41147 -2.35523  
H 3.77781 2.15072 -2.64122  
H 3.56680 0.41036 -2.89516  
C 3.62324 2.38402 -0.02321  
H 3.97195 2.30683 1.01766  
H 4.27133 3.11898 -0.53451  
H 2.59739 2.78095 -0.00613

C 5.14334 0.50269 -0.75836  
H 5.23954 -0.48202 -1.24622  
H 5.78307 1.20667 -1.32222  
H 5.56014 0.43382 0.25849  
C -3.45897 0.27272 1.67937  
C -2.72597 -0.07557 2.99821  
H -1.67207 0.24893 2.98431  
H -3.22846 0.44949 3.83039  
H -2.76119 -1.15190 3.23510  
C -3.62199 1.80649 1.61381  
H -4.12121 2.14546 0.69414  
H -4.24223 2.13670 2.46715  
H -2.64625 2.31130 1.68688  
C -4.83990 -0.41613 1.67117  
H -4.76621 -1.51639 1.70361  
H -5.39758 -0.10364 2.57329  
H -5.45156 -0.13319 0.80011  
C -3.28275 -0.38671 -1.48466  
C -2.20027 -0.43551 -2.58974  
H -1.59997 -1.35883 -2.54398  
H -2.69269 -0.40818 -3.57949  
H -1.50938 0.42249 -2.52160  
C -4.17921 -1.63854 -1.60209  
H -4.94057 -1.69985 -0.80862  
H -4.71623 -1.59833 -2.56745  
H -3.59421 -2.57300 -1.60290  
C -4.14447 0.87569 -1.69482  
H -4.57206 0.84606 -2.71362  
H -4.98843 0.93989 -0.99037  
H -3.55465 1.80256 -1.61760  
C 0.11034 1.77560 1.42902  
H 0.28547 1.74738 2.49986  
C -0.05511 2.38386 0.32594  
C -0.26218 3.62740 -0.49992  
C 0.28075 3.48099 -1.93918  
C 0.46749 4.79630 0.22156  
H 0.08102 4.93259 1.24486  
H 1.55408 4.62606 0.28214  
H 0.29992 5.73361 -0.33695  
H 1.37429 3.35913 -1.94766  
H 0.04059 4.38749 -2.52026  
H -0.17115 2.61393 -2.44995  
C -1.77013 3.97737 -0.57226  
H -2.19312 4.15347 0.42898  
H -1.90300 4.89680 -1.16781  
H -2.34371 3.17378 -1.05875

**TS (B-10)<sub>c-tBu</sub>**

SCF (BP86) Energy = -1315.36208646  
Enthalpy 0K = -1314.624048  
Enthalpy 298K = -1314.579593  
Free Energy 298K = -1314.694761  
Lowest Frequency = -595.8778 cm<sup>-1</sup>  
Second Frequency = 24.5848 cm<sup>-1</sup>  
SCF (BP86-D3BJ) Energy = -  
1315.595362  
SCF (FB) Energy = -1315.404228  
SCF (DFB) Energy = -1315.410234  
SCF (BS2) Energy = -1984.957568

Rh 0.05131 0.14752 0.10433  
P 2.40033 -0.16280 0.02204  
P -2.29902 -0.32117 0.23109  
N 0.11314 -1.88862 -0.52659

C 1.22822 -2.41130 -1.13462  
 C 1.27725 -3.74825 -1.55776  
 H 2.17984 -4.12000 -2.05013  
 C 0.17130 -4.58238 -1.35509  
 H 0.18794 -5.62321 -1.69143  
 C -0.94461 -4.06449 -0.68811  
 H -1.81118 -4.69351 -0.46739  
 C -0.94246 -2.72658 -0.26323  
 C 2.39190 -1.48495 -1.33038  
 H 3.33892 -2.04318 -1.41092  
 H 2.25363 -0.92328 -2.27072  
 C -2.04735 -2.16545 0.57651  
 H -2.97062 -2.75706 0.48544  
 H -1.72876 -2.20778 1.63307  
 C 3.03977 -1.06166 1.63325  
 C 1.83162 -1.79622 2.26374  
 H 1.48577 -2.63869 1.64360  
 H 2.14455 -2.21096 3.23985  
 H 0.98293 -1.11066 2.43093  
 C 4.15294 -2.09441 1.35772  
 H 5.06257 -1.65400 0.92502  
 H 4.44154 -2.56467 2.31564  
 H 3.80823 -2.90679 0.69583  
 C 3.52073 0.00702 2.64046  
 H 2.74683 0.77173 2.82721  
 H 3.73222 -0.48640 3.60639  
 H 4.45017 0.50629 2.32423  
 C 3.74707 1.07065 -0.65867  
 C 3.39183 1.36415 -2.13624  
 H 2.31669 1.56228 -2.27879  
 H 3.94491 2.26200 -2.46627  
 H 3.69085 0.54221 -2.80724  
 C 3.68547 2.39210 0.14161  
 H 3.85221 2.25472 1.22006  
 H 4.47089 3.07504 -0.23052  
 H 2.72095 2.90644 0.00192  
 C 5.18158 0.50296 -0.60096  
 H 5.27317 -0.47039 -1.11126  
 H 5.85782 1.20613 -1.12142  
 H 5.55689 0.39672 0.42863  
 C -3.35066 0.18963 1.78775  
 C -2.51242 -0.14531 3.04551  
 H -1.49906 0.28574 2.99038  
 H -3.01760 0.29377 3.92492  
 H -2.43753 -1.22922 3.23539  
 C -3.58536 1.71630 1.77329  
 H -4.16517 2.05485 0.90187  
 H -4.15614 1.99628 2.67732  
 H -2.62944 2.26481 1.80681  
 C -4.69768 -0.56174 1.85490  
 H -4.57010 -1.65733 1.87042  
 H -5.21176 -0.28471 2.79345  
 H -5.37521 -0.30190 1.02646  
 C -3.38028 -0.34569 -1.40955  
 C -2.37168 -0.27168 -2.58000  
 H -1.69952 -1.14519 -2.60281  
 H -2.92711 -0.25044 -3.53595  
 H -1.74017 0.63045 -2.52296  
 C -4.21008 -1.64176 -1.54404  
 H -4.90065 -1.80003 -0.70020  
 H -4.82535 -1.57102 -2.45958  
 H -3.57551 -2.53622 -1.65538  
 C -4.33685 0.86379 -1.48574  
 H -4.80815 0.87578 -2.48555

H -5.15082 0.80606 -0.74605  
 H -3.82057 1.82637 -1.35762  
 C -0.05823 1.76829 1.42654  
 H 0.97998 2.50113 0.98025  
 C -0.03635 2.40421 0.25681  
 C -0.32158 3.64545 -0.57697  
 C 0.51305 3.68295 -1.87569  
 C -0.00021 4.88511 0.30144  
 H -0.60456 4.89050 1.22269  
 H 1.06601 4.91527 0.58548  
 H -0.22138 5.80430 -0.26666  
 H 1.59265 3.75746 -1.67092  
 H 0.22560 4.56743 -2.46874  
 H 0.33205 2.78393 -2.48778  
 C -1.82003 3.65577 -0.95424  
 H -2.46685 3.62432 -0.06428  
 H -2.04108 4.58280 -1.50958  
 H -2.06339 2.80414 -1.60821

**TS (B-C)<sub>C-tBu</sub>**

SCF (BP86) Energy = -1315.41692298  
 Enthalpy 0K = -1314.678080  
 Enthalpy 298K = -1314.633086  
 Free Energy 298K = -1314.751863  
 Lowest Frequency = -143.3884 cm<sup>-1</sup>  
 Second Frequency = 13.1341 cm<sup>-1</sup>  
 SCF (BP86-D3BJ) Energy = -  
 1315.644376  
 SCF (FB) Energy = -1315.457148  
 SCF (DFB) Energy = -1315.462639  
 SCF (BS2) Energy = -1985.01344

Rh 0.05616 -0.05106 0.18849  
 P 2.40589 -0.00807 0.02443  
 P -2.19184 -0.72892 0.22979  
 N 0.35070 -2.05620 -0.42557  
 C 1.52693 -2.44864 -1.02108  
 C 1.74124 -3.77264 -1.43314  
 H 2.69388 -4.03657 -1.90067  
 C 0.73287 -4.72850 -1.26508  
 H 0.87977 -5.76172 -1.59247  
 C -0.46642 -4.33033 -0.66356  
 H -1.27666 -5.04559 -0.49725  
 C -0.62939 -3.00312 -0.23843  
 C 2.56086 -1.38504 -1.25962  
 H 3.57208 -1.81625 -1.33130  
 H 2.34330 -0.89501 -2.22522  
 C -1.86346 -2.57017 0.49991  
 H -2.72404 -3.21483 0.26149  
 H -1.67169 -2.66667 1.58337  
 C 3.34864 -0.70011 1.58423  
 C 2.36656 -1.65972 2.29843  
 H 2.12288 -2.54059 1.68223  
 H 2.83883 -2.02456 3.22935  
 H 1.41962 -1.15678 2.55959  
 C 4.63180 -1.48098 1.22820  
 H 5.37157 -0.87560 0.68343  
 H 5.11144 -1.81958 2.16492  
 H 4.41700 -2.38617 0.63640  
 C 3.68905 0.45992 2.54497  
 H 2.81296 1.09502 2.76326  
 H 4.03723 0.03860 3.50556  
 H 4.49847 1.10052 2.16016  
 C 3.36611 1.45166 -0.81886

C 2.67080 1.69378 -2.18119  
 H 1.57196 1.73293 -2.07996  
 H 3.01304 2.66203 -2.58951  
 H 2.92526 0.92689 -2.93167  
 C 3.20715 2.72845 0.03787  
 H 3.71196 2.65461 1.01210  
 H 3.66463 3.57741 -0.50291  
 H 2.14648 2.96565 0.21488  
 C 4.86242 1.15668 -1.05028  
 H 5.03147 0.22163 -1.61065  
 H 5.30111 1.97735 -1.64751  
 H 5.42927 1.10662 -0.10687  
 C -3.34668 -0.30088 1.73245  
 C -2.55082 -0.65086 3.01419  
 H -1.53102 -0.22822 2.99587  
 H -3.07797 -0.22585 3.88718  
 H -2.47317 -1.73694 3.18790  
 C -3.63743 1.21661 1.75255  
 H -4.24269 1.54508 0.89505  
 H -4.20917 1.45576 2.66781  
 H -2.70973 1.80947 1.76659  
 C -4.67196 -1.09051 1.71743  
 H -4.51741 -2.18115 1.65903  
 H -5.22065 -0.88973 2.65604  
 H -5.32997 -0.78569 0.88792  
 C -3.13519 -0.67440 -1.47545  
 C -2.03898 -0.74013 -2.56612  
 H -1.49479 -1.69877 -2.55102  
 H -2.51540 -0.64363 -3.55947  
 H -1.29905 0.07045 -2.44932  
 C -4.11218 -1.85233 -1.67711  
 H -4.89373 -1.90472 -0.90396  
 H -4.62173 -1.72704 -2.65017  
 C -3.59152 -2.82340 -1.71459  
 C -3.89366 0.66184 -1.61655  
 H -4.25469 0.76201 -2.65646  
 H -4.77658 0.71579 -0.95965  
 H -3.24464 1.52893 -1.40608  
 C -0.20547 1.86723 0.90879  
 H 0.06844 1.62847 1.95203  
 C -0.55449 2.93071 0.32296  
 C -0.95549 4.16750 -0.35454  
 C -0.66609 4.03191 -1.87973  
 C -0.09786 5.33400 0.22841  
 H -0.26825 5.45416 1.31041  
 H 0.97705 5.16676 0.05695  
 H -0.39065 6.27269 -0.27171  
 H 0.40426 3.85860 -2.07032  
 H -0.96283 4.97026 -2.37803  
 H -1.24289 3.20473 -2.32383  
 C -2.46218 4.46748 -0.12877  
 H -2.69092 4.57346 0.94389  
 H -2.72912 5.41195 -0.63225  
 H -3.09607 3.66686 -0.54215

**TS (C-D)<sub>c-tBu</sub>**

SCF (BP86) Energy = -1315.36375662  
 Enthalpy 0K = -1314.625498  
 Enthalpy 298K = -1314.580950  
 Free Energy 298K = -1314.697117  
 Lowest Frequency = -280.8519 cm<sup>-1</sup>  
 Second Frequency = 12.2741 cm<sup>-1</sup>  
 SCF (BP86-D3BJ) Energy = -  
 1315.595234

SCF (FB) Energy = -1315.407748  
 SCF (DFB) Energy = -1315.414368  
 SCF (BS2) Energy = -1984.960123

Rh -0.00824 0.03417 -0.01530  
 P 2.35048 -0.30849 -0.07934  
 P -2.38664 -0.26789 0.07017  
 N -0.04254 -2.08401 -0.04720  
 C 1.07810 -2.78528 -0.42741  
 C 1.10904 -4.18841 -0.40030  
 H 2.01977 -4.70656 -0.71166  
 C -0.02496 -4.90184 0.00040  
 H -0.01882 -5.99565 0.02053  
 C -1.16860 -4.18735 0.37076  
 H -2.07558 -4.70518 0.69386  
 C -1.15647 -2.78370 0.34693  
 C 2.24886 -1.99676 -0.92338  
 H 3.18223 -2.57737 -0.85627  
 H 2.08305 -1.75863 -1.98900  
 C -2.35718 -2.00553 0.79948  
 H -3.28569 -2.56756 0.60629  
 H -2.29227 -1.86036 1.89377  
 C 3.13606 -0.68325 1.66413  
 C 1.97229 -1.13484 2.57959  
 H 1.53862 -2.09648 2.25912  
 H 2.35845 -1.27208 3.60651  
 H 1.16159 -0.38536 2.60940  
 C 4.20175 -1.79879 1.62552  
 H 5.05286 -1.56302 0.96944  
 H 4.60344 -1.93847 2.64581  
 H 3.77794 -2.76848 1.31499  
 C 3.74277 0.61311 2.24350  
 H 3.02503 1.45083 2.23097  
 H 4.02336 0.43449 3.29738  
 H 4.65668 0.92333 1.71280  
 C 3.57370 0.61658 -1.27661  
 C 2.95889 0.55760 -2.69657  
 H 1.90070 0.87487 -2.70345  
 H 3.52491 1.25063 -3.34485  
 H 3.04383 -0.44075 -3.15792  
 C 3.68045 2.09798 -0.86527  
 H 4.11491 2.24060 0.13526  
 H 4.33531 2.62032 -1.58602  
 H 2.69367 2.58160 -0.89746  
 C 4.97535 -0.03068 -1.28472  
 H 4.95146 -1.10606 -1.52853  
 H 5.58212 0.46329 -2.06537  
 H 5.50781 0.10234 -0.32938  
 C -3.48890 0.65685 1.37780  
 C -2.57141 0.96841 2.58389  
 H -1.75208 1.65753 2.32190  
 H -3.17270 1.45030 3.37628  
 H -2.12075 0.06120 3.02294  
 C -4.02356 1.97624 0.78137  
 H -4.80375 1.80050 0.02380  
 H -4.48312 2.57477 1.58889  
 H -3.22785 2.58611 0.32548  
 C -4.67561 -0.20331 1.87223  
 H -4.35169 -1.11042 2.40831  
 H -5.26382 0.39726 2.58998  
 H -5.35665 -0.50285 1.06247  
 C -3.27853 -0.46610 -1.64127  
 C -2.44423 -1.49699 -2.43812  
 H -2.47659 -2.50722 -1.99553

|   |          |          |          |
|---|----------|----------|----------|
| H | -2.86518 | -1.57439 | -3.45683 |
| H | -1.39278 | -1.17775 | -2.53154 |
| C | -4.73301 | -0.96253 | -1.51563 |
| H | -5.39512 | -0.21036 | -1.05829 |
| H | -5.12454 | -1.16221 | -2.52988 |
| H | -4.82311 | -1.90357 | -0.94582 |
| C | -3.23368 | 0.88018  | -2.39884 |
| H | -3.63349 | 0.72043  | -3.41693 |
| H | -3.85175 | 1.65608  | -1.92247 |
| H | -2.20082 | 1.25700  | -2.49110 |
| C | -0.08892 | 1.63649  | -1.40745 |
| H | -0.60626 | 1.78107  | 0.55776  |
| C | -0.16397 | 2.41432  | -0.32716 |
| C | 0.14461  | 3.86137  | 0.10176  |
| C | 0.71169  | 4.64229  | -1.10689 |
| C | 1.13222  | 3.88284  | 1.29065  |
| H | 0.72932  | 3.32733  | 2.15621  |
| H | 2.10626  | 3.44589  | 1.02232  |
| H | 1.30593  | 4.92390  | 1.61336  |
| H | 1.67193  | 4.23059  | -1.45435 |
| H | 0.87601  | 5.69600  | -0.82330 |
| H | 0.00686  | 4.61990  | -1.95400 |
| C | -1.17769 | 4.53780  | 0.54729  |
| H | -1.61863 | 4.03246  | 1.42382  |
| H | -0.98405 | 5.58727  | 0.83062  |
| H | -1.92009 | 4.53863  | -0.26803 |

**C<sub>C</sub>-tBu**

SCF (BP86) Energy = -1315.43251607  
 Enthalpy 0K = -1314.693645  
 Enthalpy 298K = -1314.648370  
 Free Energy 298K = -1314.768392  
 Lowest Frequency = 8.3428 cm<sup>-1</sup>  
 Second Frequency = 15.9817 cm<sup>-1</sup>  
 SCF (BP86-D3BJ) Energy = -  
 1315.657877  
 SCF (FB) Energy = -1315.473546  
 SCF (DFB) Energy = -1315.479325  
 SCF (BS2) Energy = -1985.031789

|    |          |          |          |
|----|----------|----------|----------|
| Rh | 0.01978  | -0.18737 | 0.08799  |
| P  | 2.35959  | -0.31827 | -0.01394 |
| P  | -2.29113 | -0.56620 | 0.13965  |
| N  | 0.12773  | -2.27812 | -0.16500 |
| C  | 1.29753  | -2.87914 | -0.56944 |
| C  | 1.37804  | -4.26627 | -0.76730 |
| H  | 2.32816  | -4.70447 | -1.08482 |
| C  | 0.24702  | -5.06624 | -0.57565 |
| H  | 0.29367  | -6.14766 | -0.73394 |
| C  | -0.94520 | -4.45292 | -0.17618 |
| H  | -1.85017 | -5.04255 | -0.00643 |
| C  | -0.98353 | -3.06608 | 0.03306  |
| C  | 2.49523  | -2.00645 | -0.84641 |
| H  | 3.43131  | -2.53307 | -0.59400 |
| H  | 2.53588  | -1.79719 | -1.93157 |
| C  | -2.24023 | -2.40995 | 0.54122  |
| H  | -3.13598 | -2.95312 | 0.19603  |
| H  | -2.24139 | -2.46307 | 1.64611  |
| C  | 3.23933  | -0.53512 | 1.69483  |
| C  | 2.60461  | -1.78334 | 2.35190  |
| H  | 2.85962  | -2.71712 | 1.82292  |
| H  | 2.99029  | -1.87678 | 3.38324  |
| H  | 1.50585  | -1.69734 | 2.40582  |
| C  | 4.76520  | -0.72816 | 1.58750  |

|   |          |          |          |
|---|----------|----------|----------|
| H | 5.28047  | 0.18157  | 1.24062  |
| H | 5.16644  | -0.96627 | 2.58960  |
| H | 5.04327  | -1.56302 | 0.92160  |
| C | 2.91506  | 0.69674  | 2.57051  |
| H | 1.82689  | 0.81809  | 2.70357  |
| H | 3.36197  | 0.55365  | 3.57102  |
| H | 3.31973  | 1.63358  | 2.15775  |
| C | 3.33428  | 0.82195  | -1.23343 |
| C | 2.39233  | 1.04263  | -2.44129 |
| H | 1.44423  | 1.51205  | -2.13534 |
| H | 2.89579  | 1.70540  | -3.16883 |
| H | 2.15663  | 0.10313  | -2.97222 |
| C | 3.60813  | 2.18061  | -0.55292 |
| H | 4.34751  | 2.09966  | 0.26034  |
| H | 4.02557  | 2.87794  | -1.30207 |
| H | 2.68346  | 2.62850  | -0.15256 |
| C | 4.65892  | 0.19857  | -1.72741 |
| H | 4.50760  | -0.75452 | -2.26123 |
| H | 5.12656  | 0.89540  | -2.44679 |
| H | 5.38361  | 0.03003  | -0.91764 |
| C | -3.38994 | 0.13739  | 1.56870  |
| C | -2.49214 | 0.18917  | 2.82784  |
| H | -1.64799 | 0.88567  | 2.70360  |
| H | -3.09918 | 0.53940  | 3.68249  |
| H | -2.08041 | -0.79758 | 3.10246  |
| C | -3.84174 | 1.57090  | 1.21576  |
| H | -4.58706 | 1.58486  | 0.40417  |
| H | -4.31935 | 2.02419  | 2.10336  |
| H | -2.99187 | 2.21100  | 0.92610  |
| C | -4.62015 | -0.74994 | 1.86584  |
| H | -4.34171 | -1.76424 | 2.19691  |
| H | -5.19310 | -0.29053 | 2.69180  |
| H | -5.30081 | -0.84096 | 1.00691  |
| C | -3.14067 | -0.45142 | -1.59497 |
| C | -2.33299 | -1.38672 | -2.52642 |
| H | -2.43056 | -2.45065 | -2.25197 |
| H | -2.71721 | -1.27797 | -3.55680 |
| H | -1.26111 | -1.12334 | -2.53670 |
| C | -4.62175 | -0.87832 | -1.59564 |
| H | -5.26123 | -0.17443 | -1.03969 |
| H | -4.98842 | -0.89468 | -2.63840 |
| H | -4.77473 | -1.89063 | -1.18362 |
| C | -2.99512 | 0.99693  | -2.11444 |
| H | -3.35185 | 1.03889  | -3.15975 |
| H | -3.59227 | 1.71561  | -1.53276 |
| H | -1.94384 | 1.32729  | -2.09310 |
| C | -0.10227 | 1.82555  | 0.14820  |
| H | 0.00265  | 1.16002  | 1.16690  |
| C | -0.20064 | 3.06742  | 0.05724  |
| C | -0.29420 | 4.52639  | -0.12955 |
| C | 0.17328  | 4.87753  | -1.57187 |
| C | 0.63204  | 5.23312  | 0.90101  |
| H | 0.32998  | 4.99848  | 1.93490  |
| H | 1.68316  | 4.92931  | 0.76744  |
| H | 0.56825  | 6.32610  | 0.76346  |
| H | 1.21574  | 4.56271  | -1.74074 |
| H | 0.11254  | 5.96944  | -1.71928 |
| H | -0.46544 | 4.39126  | -2.32719 |
| C | -1.75684 | 5.00563  | 0.07284  |
| H | -2.11178 | 4.77908  | 1.09178  |
| H | -1.81628 | 6.09752  | -0.07486 |
| H | -2.43582 | 4.52403  | -0.64985 |

**TS (C-10)<sub>C-tBu</sub>**

SCF (BP86) Energy = -1315.41521036  
 Enthalpy 0K = -1314.678637  
 Enthalpy 298K = -1314.633195  
 Free Energy 298K = -1314.752998  
 Lowest Frequency = -789.3127 cm<sup>-1</sup>  
 Second Frequency = 12.4710 cm<sup>-1</sup>  
 SCF (BP86-D3BJ) Energy = -  
 1315.639942  
 SCF (FB) Energy = -1315.455734  
 SCF (DFB) Energy = -1315.46151764  
 SCF (BS2) Energy = -1985.012905

|    |          |          |          |
|----|----------|----------|----------|
| Rh | -0.00084 | -0.16828 | 0.03687  |
| P  | 2.31618  | -0.43715 | -0.05461 |
| P  | -2.31802 | -0.44190 | 0.09179  |
| N  | -0.00115 | -2.29063 | -0.04013 |
| C  | 1.13887  | -2.98365 | -0.37358 |
| C  | 1.16060  | -4.38589 | -0.42756 |
| H  | 2.09137  | -4.89459 | -0.69342 |
| C  | -0.00524 | -5.11264 | -0.16497 |
| H  | -0.00638 | -6.20558 | -0.21155 |
| C  | -1.17036 | -4.40828 | 0.15577  |
| H  | -2.10346 | -4.93574 | 0.37229  |
| C  | -1.14559 | -3.00663 | 0.22265  |
| C  | 2.36805  | -2.19424 | -0.74223 |
| H  | 3.28633  | -2.73992 | -0.46610 |
| H  | 2.38949  | -2.07379 | -1.84126 |
| C  | -2.37887 | -2.24776 | 0.63852  |
| H  | -3.29293 | -2.76871 | 0.30626  |
| H  | -2.41602 | -2.21522 | 1.74327  |
| C  | 3.20027  | -0.56261 | 1.66412  |
| C  | 2.49736  | -1.71187 | 2.42457  |
| H  | 2.69560  | -2.70003 | 1.97651  |
| H  | 2.87964  | -1.74014 | 3.46122  |
| H  | 1.40518  | -1.55819 | 2.46699  |
| C  | 4.71182  | -0.85126 | 1.57705  |
| H  | 5.27820  | -0.00592 | 1.15471  |
| H  | 5.10327  | -1.02726 | 2.59591  |
| H  | 4.93812  | -1.75377 | 0.98394  |
| C  | 2.94959  | 0.75221  | 2.43681  |
| H  | 1.86823  | 0.93768  | 2.55461  |
| H  | 3.38955  | 0.66856  | 3.44730  |
| H  | 3.40490  | 1.62829  | 1.94897  |
| C  | 3.36621  | 0.53126  | -1.36240 |
| C  | 2.44095  | 0.71405  | -2.58923 |
| H  | 1.51297  | 1.24550  | -2.32506 |
| H  | 2.97757  | 1.29825  | -3.35943 |
| H  | 2.15824  | -0.24786 | -3.05161 |
| C  | 3.73369  | 1.92055  | -0.79873 |
| H  | 4.46915  | 1.85973  | 0.01983  |
| H  | 4.19078  | 2.52685  | -1.60214 |
| H  | 2.84312  | 2.45937  | -0.43478 |
| C  | 4.64678  | -0.21280 | -1.80276 |
| H  | 4.43162  | -1.19551 | -2.25415 |
| H  | 5.15572  | 0.38924  | -2.57777 |
| H  | 5.36271  | -0.35981 | -0.98105 |
| C  | -3.40621 | 0.41368  | 1.44758  |
| C  | -2.52280 | 0.50085  | 2.71467  |
| H  | -1.60241 | 1.07924  | 2.53559  |
| H  | -3.09560 | 0.99707  | 3.51945  |
| H  | -2.22234 | -0.49173 | 3.09265  |
| C  | -3.77167 | 1.84150  | 0.98872  |
| H  | -4.49463 | 1.83928  | 0.15692  |
| H  | -4.24393 | 2.38241  | 1.82905  |

|   |          |          |          |
|---|----------|----------|----------|
| H | -2.88133 | 2.41274  | 0.67743  |
| C | -4.69151 | -0.37314 | 1.79044  |
| H | -4.47943 | -1.38306 | 2.17878  |
| H | -5.23475 | 0.16748  | 2.58713  |
| H | -5.37622 | -0.46912 | 0.93549  |
| C | -3.15909 | -0.42404 | -1.65250 |
| C | -2.41587 | -1.49050 | -2.49145 |
| H | -2.59982 | -2.51704 | -2.13221 |
| H | -2.77759 | -1.43855 | -3.53451 |
| H | -1.32688 | -1.31075 | -2.49802 |
| C | -4.66655 | -0.74370 | -1.63466 |
| H | -5.25971 | 0.05029  | -1.15345 |
| H | -5.02728 | -0.83115 | -2.67606 |
| H | -4.89200 | -1.70080 | -1.13364 |
| C | -2.90722 | 0.95923  | -2.29463 |
| H | -3.28030 | 0.94724  | -3.33508 |
| H | -3.42779 | 1.77306  | -1.76620 |
| H | -1.82993 | 1.19331  | -2.31757 |
| C | -0.00574 | 1.78792  | 0.03446  |
| H | 0.11054  | 2.06216  | 1.18098  |
| C | -0.01246 | 3.06484  | 0.01283  |
| C | 0.00011  | 4.54002  | -0.01826 |
| C | 0.06209  | 4.92769  | -1.52930 |
| C | 1.25429  | 5.09037  | 0.71359  |
| H | 1.24488  | 4.81698  | 1.78191  |
| H | 2.18320  | 4.70794  | 0.26127  |
| H | 1.26343  | 6.19109  | 0.64503  |
| H | 0.97594  | 4.54048  | -2.00706 |
| H | 0.06872  | 6.02820  | -1.60464 |
| H | -0.81442 | 4.54915  | -2.07908 |
| C | -1.28791 | 5.12519  | 0.61916  |
| H | -1.36843 | 4.84732  | 1.68309  |
| H | -1.26332 | 6.22614  | 0.55618  |
| H | -2.18955 | 4.77003  | 0.09489  |

**Dc-tBu**

SCF (BP86) Energy = -1315.36477713  
 Enthalpy 0K = -1314.625878  
 Enthalpy 298K = -1314.581042  
 Free Energy 298K = -1314.697676  
 Lowest Frequency = 10.4549 cm<sup>-1</sup>  
 Second Frequency = 31.3418 cm<sup>-1</sup>  
 SCF (BP86-D3BJ) Energy = -  
 1315.596551  
 SCF (FB) Energy = -1315.409167  
 SCF (DFB) Energy = -1315.415953  
 SCF (BS2) Energy = -1984.961713

|    |          |          |          |
|----|----------|----------|----------|
| Rh | -0.00042 | 0.04022  | 0.02809  |
| P  | 2.37557  | -0.24572 | -0.04501 |
| P  | -2.36095 | -0.31604 | 0.10572  |
| N  | 0.03537  | -2.06646 | -0.18151 |
| C  | 1.17001  | -2.70638 | -0.62130 |
| C  | 1.23116  | -4.10533 | -0.71176 |
| H  | 2.15050  | -4.57605 | -1.06963 |
| C  | 0.11500  | -4.87413 | -0.36442 |
| H  | 0.14472  | -5.96535 | -0.43710 |
| C  | -1.03898 | -4.22022 | 0.07802  |
| H  | -1.92989 | -4.78408 | 0.36671  |
| C  | -1.05664 | -2.81902 | 0.17143  |
| C  | 2.32131  | -1.84864 | -1.04227 |
| H  | 3.26846  | -2.41064 | -1.02908 |
| H  | 2.14663  | -1.51243 | -2.07985 |
| C  | -2.25899 | -2.10365 | 0.71248  |



H -3.18078 -2.67551 0.51717  
H -2.15763 -2.02755 1.81104  
C 3.09956 -0.75316 1.69053  
C 1.91777 -1.31419 2.51920  
H 1.53653 -2.26537 2.11292  
H 2.26582 -1.51092 3.55007  
H 1.07735 -0.59758 2.56952  
C 4.20035 -1.83114 1.60472  
H 5.07671 -1.51058 1.02265  
H 4.55180 -2.06036 2.62749  
H 3.82335 -2.77587 1.17815  
C 3.63685 0.50876 2.40128  
H 2.88544 1.31597 2.43923  
H 3.89424 0.24816 3.44394  
H 4.55096 0.90225 1.92974  
C 3.63054 0.80615 -1.09404  
C 3.13189 0.79870 -2.56032  
H 2.05728 1.04359 -2.63465  
H 3.69482 1.56956 -3.11708  
H 3.32774 -0.16044 -3.06877  
C 3.61823 2.26386 -0.58831  
H 3.93856 2.36169 0.45994  
H 4.31889 2.85715 -1.20348  
H 2.61533 2.70132 -0.69847  
C 5.06366 0.23563 -1.03326  
H 5.11812 -0.82204 -1.34193  
H 5.69399 0.80941 -1.73707  
H 5.52023 0.33580 -0.03567  
C -3.48188 0.46231 1.49248  
C -2.52924 0.81597 2.65807  
H -1.78568 1.57509 2.36638  
H -3.12052 1.22255 3.49878  
H -1.98182 -0.06443 3.03917  
C -4.17325 1.74277 0.98054  
H -4.97471 1.51979 0.25840  
H -4.64217 2.26117 1.83662  
H -3.46851 2.44532 0.51227  
C -4.56080 -0.52160 2.00373  
H -4.13451 -1.40152 2.51204  
H -5.18255 0.00544 2.75017  
H -5.23475 -0.87143 1.20721  
C -3.26802 -0.42986 -1.60355  
C -2.39657 -1.34682 -2.49362  
H -2.36142 -2.38739 -2.12828  
H -2.83877 -1.37231 -3.50597  
H -1.36875 -0.95761 -2.58382  
C -4.69057 -1.01406 -1.48579  
H -5.37564 -0.34944 -0.93605  
H -5.10507 -1.13523 -2.50322  
H -4.71124 -2.01017 -1.01083  
C -3.31048 0.97232 -2.25207  
H -3.72396 0.87033 -3.27208  
H -3.95723 1.67486 -1.70549  
H -2.29849 1.40328 -2.33624  
C -0.01802 1.58178 -1.46678  
H -0.08100 1.69252 0.62340  
C -0.04184 2.38517 -0.41890  
C -0.06044 3.86220 -0.00433  
C 0.43187 4.68454 -1.22232  
C 0.85057 4.11342 1.22003  
H 0.51699 3.52583 2.09464  
H 1.90093 3.85696 1.01211  
H 0.81256 5.17926 1.50229  
H 1.46800 4.42793 -1.49407

H 0.39558 5.76031 -0.97859  
H -0.20696 4.50635 -2.10246  
C -1.49957 4.30780 0.35184  
H -1.87851 3.77527 1.24039  
H -1.51047 5.38703 0.58524  
H -2.18943 4.13270 -0.48998

**TS (C-E)<sub>c-tBu</sub>**

SCF (BP86) Energy = -1315.42880900  
Enthalpy 0K = -1314.691619  
Enthalpy 298K = -1314.646611  
Free Energy 298K = -1314.765219  
Lowest Frequency = -642.3505 cm<sup>-1</sup>  
Second Frequency = 15.5195 cm<sup>-1</sup>  
SCF (BP86-D3BJ) Energy = -  
1315.655218  
SCF (FB) Energy = -1315.471692  
SCF (DFB) Energy = -1315.47812  
SCF (BS2) Energy = -1985.027935

Rh 0.00849 -0.17359 -0.00867  
P -2.32329 -0.47347 0.05735  
P 2.34308 -0.39595 -0.09672  
N 0.03912 -2.30854 -0.00318  
C -1.09168 -3.02164 0.31300  
C -1.08620 -4.42498 0.33603  
H -2.00594 -4.96034 0.58709  
C 0.09606 -5.12015 0.05824  
H 0.11772 -6.21371 0.08004  
C 1.25051 -4.39039 -0.24785  
H 2.19089 -4.89884 -0.47739  
C 1.19994 -2.98846 -0.28374  
C -2.33546 -2.25576 0.69330  
H -3.24317 -2.80575 0.39249  
H -2.37269 -2.17232 1.79567  
C 2.40991 -2.18847 -0.69559  
H 3.34110 -2.70357 -0.40553  
H 2.41844 -2.11551 -1.79957  
C -3.20613 -0.55456 -1.65829  
C -2.48644 -1.66258 -2.46297  
H -2.65401 -2.66871 -2.04296  
H -2.88616 -1.66835 -3.49302  
H -1.39970 -1.48222 -2.52173  
C -4.70878 -0.88472 -1.55233  
H -5.28499 -0.06849 -1.08881  
H -5.11387 -1.03162 -2.57012  
H -4.90361 -1.81401 -0.99008  
C -3.00570 0.79404 -2.38557  
H -1.93727 1.04144 -2.49691  
H -3.44273 0.72062 -3.39781  
H -3.49827 1.63286 -1.87126  
C -3.33698 0.46313 1.40866  
C -2.37417 0.62428 2.60991  
H -1.48222 1.20996 2.33505  
H -2.90374 1.15508 3.42204  
H -2.04405 -0.34576 3.02384  
C -3.71703 1.86309 0.87993  
H -4.48073 1.81677 0.08660  
H -4.14699 2.45238 1.71019  
H -2.83496 2.40513 0.50030  
C -4.60186 -0.29986 1.86093  
H -4.37196 -1.28688 2.29601  
H -5.10006 0.28883 2.65263  
H -5.33207 -0.44051 1.05039

|   |          |          |          |
|---|----------|----------|----------|
| C | 3.41263  | 0.52735  | -1.41402 |
| C | 2.52892  | 0.68475  | -2.67404 |
| H | 1.66487  | 1.34087  | -2.48474 |
| H | 3.13597  | 1.14370  | -3.47539 |
| H | 2.15426  | -0.27918 | -3.06093 |
| C | 3.78246  | 1.92999  | -0.88562 |
| H | 4.52188  | 1.88731  | -0.06977 |
| H | 4.23975  | 2.50990  | -1.70768 |
| H | 2.89468  | 2.48224  | -0.53617 |
| C | 4.69096  | -0.25819 | -1.78714 |
| H | 4.46972  | -1.23128 | -2.25633 |
| H | 5.25907  | 0.33193  | -2.52884 |
| H | 5.35592  | -0.43061 | -0.92807 |
| C | 3.14323  | -0.40871 | 1.66370  |
| C | 2.37115  | -1.47696 | 2.47490  |
| H | 2.52052  | -2.49905 | 2.08820  |
| H | 2.73738  | -1.46318 | 3.51729  |
| H | 1.28705  | -1.26845 | 2.50205  |
| C | 4.64571  | -0.75309 | 1.66235  |
| H | 5.25490  | 0.03355  | 1.18995  |
| H | 4.99184  | -0.84656 | 2.70806  |
| H | 4.86356  | -1.71272 | 1.16273  |
| C | 2.90288  | 0.97115  | 2.31868  |
| H | 3.21223  | 0.92129  | 3.37854  |
| H | 3.48743  | 1.77179  | 1.84143  |
| H | 1.83916  | 1.25857  | 2.28077  |
| C | -0.01916 | 1.79220  | 0.03300  |
| H | -0.05794 | 0.79880  | -1.22722 |
| C | -0.04392 | 3.03568  | -0.03208 |
| C | -0.09709 | 4.51293  | -0.00023 |
| C | -0.51194 | 4.97529  | 1.42516  |
| C | -1.14652 | 5.01499  | -1.03074 |
| H | -0.88137 | 4.69995  | -2.05355 |
| H | -2.15126 | 4.62540  | -0.79749 |
| H | -1.19206 | 6.11763  | -1.01113 |
| H | -1.50515 | 4.58199  | 1.69709  |
| H | -0.55512 | 6.07766  | 1.46032  |
| H | 0.21501  | 4.63360  | 2.18017  |
| C | 1.29162  | 5.11191  | -0.34979 |
| H | 1.61501  | 4.80311  | -1.35774 |
| H | 1.24305  | 6.21441  | -0.32895 |
| H | 2.05622  | 4.78978  | 0.37660  |

**E<sub>C</sub>-tBu**

SCF (BP86) Energy = -1315.43634721  
 Enthalpy 0K = -1314.697420  
 Enthalpy 298K = -1314.652265  
 Free Energy 298K = -1314.770842  
 Lowest Frequency = 16.5130 cm<sup>-1</sup>  
 Second Frequency = 19.8705 cm<sup>-1</sup>  
 SCF (BP86-D3BJ) Energy = -1315.66336  
 SCF (FB) Energy = -1315.481579  
 SCF (DFB) Energy = -1315.488927  
 SCF (BS2) Energy = -1985.034525

|    |          |          |          |
|----|----------|----------|----------|
| Rh | 0.00869  | -0.18129 | -0.00992 |
| P  | -2.32851 | -0.45237 | 0.05546  |
| P  | 2.34078  | -0.42189 | -0.09678 |
| N  | 0.02045  | -2.32493 | 0.02694  |
| C  | -1.12671 | -3.02204 | 0.31015  |
| C  | -1.14448 | -4.42560 | 0.31033  |
| H  | -2.07624 | -4.95055 | 0.53831  |
| C  | 0.03159  | -5.13462 | 0.04022  |
| H  | 0.03631  | -6.22857 | 0.04612  |

|   |          |          |          |
|---|----------|----------|----------|
| C | 1.20119  | -4.41861 | -0.23965 |
| H | 2.13647  | -4.93853 | -0.46477 |
| C | 1.17181  | -3.01521 | -0.25621 |
| C | -2.36130 | -2.23776 | 0.68728  |
| H | -3.27621 | -2.77488 | 0.38533  |
| H | -2.39895 | -2.15519 | 1.78988  |
| C | 2.39999  | -2.22894 | -0.65154 |
| H | 3.31913  | -2.74307 | -0.32354 |
| H | 2.44288  | -2.18622 | -1.75642 |
| C | -3.24119 | -0.49523 | -1.64331 |
| C | -2.59796 | -1.63694 | -2.46493 |
| H | -2.78748 | -2.63314 | -2.03109 |
| H | -3.03791 | -1.63261 | -3.47827 |
| H | -1.50838 | -1.50469 | -2.57474 |
| C | -4.75492 | -0.75771 | -1.50404 |
| H | -5.28059 | 0.07649  | -1.01360 |
| H | -5.19095 | -0.86854 | -2.51345 |
| H | -4.97811 | -1.68662 | -0.95154 |
| C | -2.99006 | 0.84732  | -2.36627 |
| H | -1.91406 | 1.06771  | -2.45611 |
| H | -3.41701 | 0.78927  | -3.38379 |
| H | -3.46596 | 1.69724  | -1.85429 |
| C | -3.28493 | 0.50391  | 1.43342  |
| C | -2.28428 | 0.63816  | 2.60744  |
| H | -1.39703 | 1.22323  | 2.31278  |
| H | -2.78023 | 1.16710  | 3.44168  |
| H | -1.95417 | -0.34020 | 3.00210  |
| C | -3.64212 | 1.91425  | 0.91687  |
| H | -4.42544 | 1.88853  | 0.14201  |
| H | -4.03767 | 2.51113  | 1.75874  |
| H | -2.75490 | 2.43349  | 0.51753  |
| C | -4.55424 | -0.23103 | 1.91728  |
| H | -4.33629 | -1.22297 | 2.34740  |
| H | -5.01993 | 0.36910  | 2.72008  |
| H | -5.30647 | -0.35539 | 1.12446  |
| C | 3.39462  | 0.48259  | -1.43535 |
| C | 2.49384  | 0.61714  | -2.68567 |
| H | 1.61300  | 1.24551  | -2.48071 |
| H | 3.07999  | 1.09346  | -3.49235 |
| H | 2.14848  | -0.35890 | -3.07145 |
| C | 3.75684  | 1.89523  | -0.92867 |
| H | 4.50073  | 1.86945  | -0.11600 |
| H | 4.20678  | 2.46507  | -1.76166 |
| H | 2.86497  | 2.44475  | -0.58556 |
| C | 4.67457  | -0.30092 | -1.80547 |
| H | 4.45708  | -1.28656 | -2.24983 |
| H | 5.22867  | 0.27710  | -2.56690 |
| H | 5.35113  | -0.44760 | -0.95044 |
| C | 3.13912  | -0.39901 | 1.66392  |
| C | 2.37086  | -1.45515 | 2.49458  |
| H | 2.52181  | -2.48328 | 2.12533  |
| H | 2.73776  | -1.42260 | 3.53620  |
| H | 1.28534  | -1.25226 | 2.52082  |
| C | 4.64201  | -0.74209 | 1.66283  |
| H | 5.24769  | 0.03605  | 1.17239  |
| H | 4.99259  | -0.81509 | 2.70868  |
| H | 4.85883  | -1.71086 | 1.18072  |
| C | 2.90114  | 0.99232  | 2.29482  |
| H | 3.20812  | 0.95979  | 3.35593  |
| H | 3.48809  | 1.78288  | 1.80433  |
| H | 1.83947  | 1.28780  | 2.25076  |
| C | 0.00121  | 1.77722  | -0.02733 |
| H | -0.02948 | -0.15793 | -1.52447 |
| C | -0.00743 | 3.02067  | -0.04218 |

C -0.04509 4.50031 -0.01237  
 C -0.45498 4.97496 1.40953  
 C -1.08688 5.01210 -1.04544  
 H -0.82555 4.68675 -2.06598  
 H -2.09660 4.63604 -0.81094  
 H -1.11932 6.11555 -1.03264  
 H -1.45261 4.59370 1.68332  
 H -0.48657 6.07795 1.44213  
 H 0.26769 4.62820 2.16669  
 C 1.34932 5.08534 -0.36277  
 H 1.66983 4.76948 -1.36950  
 H 1.31340 6.18860 -0.34547  
 H 2.11056 4.75728 0.36476

**10<sub>c-tBu</sub>**

SCF (BP86) Energy = -1315.45119958  
 Enthalpy 0K = -1314.710171  
 Enthalpy 298K = -1314.665198  
 Free Energy 298K = -1314.783080  
 Lowest Frequency = 18.7166 cm<sup>-1</sup>  
 Second Frequency = 31.6497 cm<sup>-1</sup>  
 SCF (BP86-D3BJ) Energy = -  
 1315.678862  
 SCF (FB) Energy = -1315.492862  
 SCF (DFB) Energy = -1315.498767  
 SCF (BS2) Energy = -1985.047832

Rh 0.00502 -0.11476 0.04181  
 P 2.34241 -0.37102 -0.03130  
 P -2.32635 -0.42062 0.10508  
 N 0.02572 -2.27589 -0.13237  
 C 1.18154 -2.93408 -0.46670  
 C 1.21614 -4.33334 -0.57963  
 H 2.15400 -4.82821 -0.84608  
 C 0.04770 -5.07386 -0.36970  
 H 0.05601 -6.16405 -0.46318  
 C -1.13119 -4.39783 -0.03611  
 H -2.06017 -4.94534 0.14462  
 C -1.11801 -2.99944 0.09011  
 C 2.41182 -2.11481 -0.76677  
 H 3.32470 -2.66013 -0.47243  
 H 2.47465 -1.96800 -1.86091  
 C -2.35529 -2.26301 0.53830  
 H -3.26555 -2.76769 0.17247  
 H -2.39860 -2.30071 1.64271  
 C 3.17536 -0.54323 1.70585  
 C 2.43884 -1.69993 2.42183  
 H 2.62477 -2.68007 1.95092  
 H 2.80502 -1.76308 3.46253  
 H 1.34933 -1.52606 2.45616  
 C 4.68502 -0.84831 1.64809  
 H 5.26898 0.00137 1.26019  
 H 5.04817 -1.04999 2.67250  
 H 4.91909 -1.73968 1.04114  
 C 2.91992 0.76076 2.49541  
 H 1.84257 0.98595 2.55401  
 H 3.30312 0.63720 3.52467  
 H 3.42952 1.63112 2.05448  
 C 3.40650 0.63196 -1.29428  
 C 2.50704 0.81276 -2.54040  
 H 1.54994 1.29745 -2.28874  
 H 3.03686 1.44342 -3.27744  
 H 2.28108 -0.14543 -3.04076  
 C 3.72718 2.01533 -0.68859

H 4.46357 1.94982 0.12884  
 H 4.16625 2.66032 -1.47120  
 H 2.82229 2.51504 -0.30465  
 C 4.71227 -0.07932 -1.71277  
 H 4.52992 -1.05884 -2.18546  
 H 5.22740 0.54634 -2.46437  
 H 5.40983 -0.22425 -0.87519  
 C -3.39664 0.33430 1.52874  
 C -2.48461 0.34916 2.77865  
 H -1.56951 0.93850 2.61041  
 H -3.04051 0.79892 3.62145  
 H -2.18130 -0.66425 3.09529  
 C -3.78223 1.78471 1.16627  
 H -4.51138 1.82817 0.34098  
 H -4.25777 2.25870 2.04419  
 H -2.90049 2.38745 0.89428  
 C -4.66741 -0.48778 1.83998  
 H -4.44115 -1.51909 2.15798  
 H -5.19959 -0.00499 2.67981  
 H -5.36733 -0.53289 0.99301  
 C -3.18024 -0.31840 -1.62747  
 C -2.42871 -1.32110 -2.53470  
 H -2.58685 -2.37040 -2.23308  
 H -2.80676 -1.21771 -3.56791  
 H -1.34348 -1.11904 -2.55048  
 C -4.68229 -0.66270 -1.61026  
 H -5.27925 0.09170 -1.07366  
 H -5.05484 -0.69096 -2.65067  
 H -4.88824 -1.65201 -1.16671  
 C -2.95808 1.10521 -2.18624  
 H -3.34454 1.15169 -3.22065  
 H -3.48238 1.87684 -1.60171  
 H -1.88475 1.35728 -2.20832  
 C -0.02789 1.70408 0.34089  
 H -0.19945 3.10991 1.79857  
 C -0.08578 2.97366 0.70702  
 C -0.04845 4.28652 -0.10137  
 C 0.17023 4.02365 -1.60440  
 C 1.09677 5.16976 0.45200  
 H 0.96035 5.37790 1.52725  
 H 2.07915 4.68616 0.32027  
 H 1.12020 6.13776 -0.07856  
 H 1.14207 3.53802 -1.79159  
 H 0.15936 4.97681 -2.16004  
 H -0.62487 3.38151 -2.01993  
 C -1.39789 5.01904 0.10617  
 H -1.59721 5.20361 1.17586  
 H -1.38102 5.99699 -0.40653  
 H -2.23777 4.43454 -0.30561

**TS (B-10) 'c-tBu**

SCF (BP86) Energy = -1315.33306337  
 Enthalpy 0K = -1314.594363  
 Enthalpy 298K = -1314.549666  
 Free Energy 298K = -1314.664721  
 Lowest Frequency = -464.8404 cm<sup>-1</sup>  
 Second Frequency = 23.6300 cm<sup>-1</sup>  
 SCF (BP86-D3BJ) Energy = -1315.56652  
 SCF (FB) Energy = -1315.37512  
 SCF (DFB) Energy = -1315.38131  
 SCF (BS2) Energy = -1984.930783

Rh 0.05269 0.06265 -0.01206  
 P 2.42484 -0.09675 -0.04898

P -2.26940 -0.46700 0.09051  
 N 0.23647 -2.07309 -0.05566  
 C 1.40674 -2.67891 -0.44760  
 C 1.53144 -4.07499 -0.52461  
 H 2.48427 -4.50518 -0.84492  
 C 0.44362 -4.89298 -0.20624  
 H 0.52341 -5.98234 -0.26611  
 C -0.74766 -4.28110 0.19477  
 H -1.62320 -4.87710 0.46603  
 C -0.82591 -2.88148 0.26850  
 C 2.56639 -1.80364 -0.82434  
 H 3.52436 -2.30120 -0.59787  
 H 2.54642 -1.62466 -1.91535  
 C -2.07767 -2.22134 0.75786  
 H -2.96033 -2.85090 0.55852  
 H -2.00599 -2.10284 1.85488  
 C 3.23707 -0.29258 1.70862  
 C 2.56487 -1.51160 2.38174  
 H 2.83031 -2.46481 1.89508  
 H 2.91139 -1.57262 3.42956  
 H 1.46609 -1.41335 2.39142  
 C 4.76283 -0.51149 1.67527  
 H 5.31011 0.38287 1.33852  
 H 5.11059 -0.73798 2.70003  
 H 5.05718 -1.36305 1.03891  
 C 2.90178 0.96135 2.54778  
 H 1.81255 1.05490 2.69269  
 H 3.36228 0.86023 3.54736  
 H 3.28811 1.89217 2.10176  
 C 3.54247 0.94216 -1.26133  
 C 2.72656 1.13395 -2.56146  
 H 1.76904 1.64915 -2.37939  
 H 3.32823 1.73934 -3.26415  
 H 2.50963 0.17663 -3.06788  
 C 3.85139 2.32332 -0.64326  
 H 4.49015 2.25077 0.25225  
 H 4.40196 2.93029 -1.38488  
 H 2.93238 2.87158 -0.38390  
 C 4.86610 0.22413 -1.61512  
 H 4.70413 -0.75315 -2.09871  
 H 5.40995 0.85148 -2.34484  
 H 5.53036 0.07969 -0.75184  
 C -3.52126 0.22275 1.42066  
 C -2.65802 0.58974 2.65049  
 H -1.85669 1.30160 2.39868  
 H -3.30245 1.04271 3.42612  
 H -2.18020 -0.29648 3.10338  
 C -4.25121 1.47393 0.89354  
 H -4.96237 1.23098 0.08768  
 H -4.83437 1.92656 1.71610  
 H -3.55913 2.24282 0.51922  
 C -4.58205 -0.81761 1.85287  
 H -4.14255 -1.70164 2.34136  
 H -5.24750 -0.34301 2.59717  
 H -5.21540 -1.15786 1.02045  
 C -3.11047 -0.72295 -1.64281  
 C -2.17538 -1.65743 -2.44631  
 H -2.13949 -2.67992 -2.03499  
 H -2.55728 -1.73360 -3.48069  
 H -1.14720 -1.25879 -2.49273  
 C -4.51902 -1.34503 -1.57169  
 H -5.25633 -0.67029 -1.10825  
 H -4.87003 -1.54899 -2.60002  
 H -4.53601 -2.30642 -1.03045

C -3.16203 0.63863 -2.36788  
 H -3.51707 0.48108 -3.40277  
 H -3.86068 1.34366 -1.88980  
 H -2.16350 1.10350 -2.41662  
 C 0.35643 2.15067 0.48063  
 H 0.85784 2.52798 1.36645  
 C 0.15826 2.07370 -0.81272  
 C -0.75715 3.83118 -0.06963  
 C 0.38162 4.79012 -0.38482  
 C -1.34668 4.05873 1.32533  
 H -2.05773 3.27381 1.61881  
 H -0.57716 4.15073 2.10840  
 H -1.90697 5.01409 1.30016  
 H 1.17753 4.76648 0.37765  
 H -0.02828 5.81859 -0.40031  
 H 0.82551 4.58213 -1.36999  
 C -1.83718 3.82948 -1.14336  
 H -1.41043 3.78565 -2.15471  
 H -2.53805 2.99189 -1.02762  
 H -2.42094 4.76729 -1.03957

**TS(B-10) "c-tBu**

SCF (BP86) Energy = -1315.35950815  
 Enthalpy 0K = -1314.620639  
 Enthalpy 298K = -1314.575751  
 Free Energy 298K = -1314.691455  
 Lowest Frequency = -435.6637 cm<sup>-1</sup>  
 Second Frequency = 21.0132 cm<sup>-1</sup>  
 SCF (BP86-D3BJ) Energy = -  
 1315.594527  
 SCF (FB) Energy = -1315.400572  
 SCF (DFB) Energy = -1315.406347  
 SCF (BS2) Energy = -1984.957103

Rh -0.05205 -0.10420 0.04730  
 P 2.29373 0.29797 0.14765  
 P -2.37745 0.22589 -0.03225  
 N -0.07970 2.03094 -0.12124  
 C 1.01586 2.77538 0.24864  
 C 1.05676 4.16927 0.09541  
 H 1.95629 4.71189 0.39870  
 C -0.05747 4.84657 -0.41267  
 H -0.04527 5.93317 -0.53781  
 C -1.19485 4.09944 -0.73529  
 H -2.09765 4.58498 -1.11611  
 C -1.18406 2.70383 -0.58173  
 C 2.14345 2.02923 0.88988  
 H 3.08047 2.60631 0.86383  
 H 1.88509 1.85612 1.94945  
 C -2.39454 1.88770 -0.92797  
 H -3.32004 2.46176 -0.75242  
 H -2.37126 1.63509 -2.00385  
 C 3.21139 0.64305 -1.55361  
 C 2.09794 0.89429 -2.59810  
 H 1.51407 1.80093 -2.37184  
 H 2.56163 1.03398 -3.59246  
 H 1.39277 0.04803 -2.65679  
 C 4.12732 1.88505 -1.48974  
 H 4.91151 1.80389 -0.72057  
 H 4.63644 1.99928 -2.46437  
 H 3.55884 2.81341 -1.31691  
 C 4.04752 -0.57308 -2.00642  
 H 3.45032 -1.49615 -2.07074  
 H 4.44130 -0.37187 -3.01959

|   |          |          |          |
|---|----------|----------|----------|
| H | 4.91598  | -0.75977 | -1.35507 |
| C | 3.48608  | -0.52534 | 1.44578  |
| C | 2.77393  | -0.43962 | 2.81869  |
| H | 1.72256  | -0.76928 | 2.75597  |
| H | 3.29781  | -1.10025 | 3.53324  |
| H | 2.79949  | 0.57532  | 3.24840  |
| C | 3.66995  | -2.01811 | 1.10215  |
| H | 4.16017  | -2.18118 | 0.13067  |
| H | 4.30523  | -2.49042 | 1.87392  |
| H | 2.69893  | -2.53602 | 1.10424  |
| C | 4.86059  | 0.17011  | 1.53489  |
| H | 4.77772  | 1.24589  | 1.76312  |
| H | 5.44147  | -0.28997 | 2.35555  |
| H | 5.45462  | 0.05438  | 0.61437  |
| C | -3.56116 | -0.78465 | -1.19086 |
| C | -2.71633 | -1.11658 | -2.44531 |
| H | -1.72565 | -1.52376 | -2.18564 |
| H | -3.25456 | -1.85395 | -3.06856 |
| H | -2.54789 | -0.22592 | -3.07516 |
| C | -3.99808 | -2.07688 | -0.46744 |
| H | -4.74360 | -1.86888 | 0.31727  |
| H | -4.47281 | -2.76386 | -1.19173 |
| H | -3.15184 | -2.60576 | -0.00319 |
| C | -4.81730 | -0.00932 | -1.65059 |
| H | -4.57037 | 0.91360  | -2.20029 |
| H | -5.38711 | -0.65176 | -2.34719 |
| H | -5.49176 | 0.25011  | -0.82233 |
| C | -3.20093 | 0.58568  | 1.69049  |
| C | -2.40352 | 1.74791  | 2.32735  |
| H | -2.53578 | 2.69976  | 1.78618  |
| H | -2.76752 | 1.90380  | 3.35931  |
| H | -1.32553 | 1.51784  | 2.37528  |
| C | -4.68981 | 0.97689  | 1.60790  |
| H | -5.32921 | 0.13720  | 1.29266  |
| H | -5.03359 | 1.28517  | 2.61244  |
| H | -4.87057 | 1.82837  | 0.92991  |
| C | -3.02808 | -0.66280 | 2.58415  |
| H | -3.41194 | -0.43753 | 3.59606  |
| H | -3.58085 | -1.53699 | 2.20679  |
| H | -1.96379 | -0.93637 | 2.67555  |
| C | -0.05138 | -2.04991 | 0.53368  |
| C | -0.17811 | -2.75591 | 1.57972  |
| H | -0.27565 | -3.40418 | 2.43617  |
| C | 0.26438  | -3.66405 | -0.42853 |
| C | -1.08783 | -4.15989 | -0.92288 |
| H | -0.90597 | -5.01276 | -1.60508 |
| H | -1.72255 | -4.52219 | -0.09929 |
| H | -1.63491 | -3.39532 | -1.48816 |
| C | 1.00287  | -4.78318 | 0.33193  |
| H | 0.36698  | -5.28716 | 1.07736  |
| H | 1.29901  | -5.54845 | -0.40972 |
| H | 1.92176  | -4.43100 | 0.82374  |
| C | 1.14449  | -3.13190 | -1.55880 |
| H | 2.10667  | -2.76348 | -1.17835 |
| H | 1.35284  | -3.97656 | -2.24574 |
| H | 0.64936  | -2.32403 | -2.11658 |

**TS (B-F)<sub>c-tBu</sub>**

SCF (BP86) Energy = -1315.34138384  
 Enthalpy 0K = -1314.602636  
 Enthalpy 298K = -1314.557787  
 Free Energy 298K = -1314.672611  
 Lowest Frequency = -228.9709 cm<sup>-1</sup>  
 Second Frequency = 33.9755 cm<sup>-1</sup>

SCF (BP86-D3BJ) Energy = -  
 1315.584824  
 SCF (FB) Energy = -1315.38253  
 SCF (DFB) Energy = -1315.388362  
 SCF (BS2) Energy = -1984.939804

|    |          |          |          |
|----|----------|----------|----------|
| Rh | -0.04265 | -0.32745 | -0.05144 |
| P  | 2.32360  | 0.13856  | 0.25066  |
| P  | -2.37106 | 0.12657  | 0.02308  |
| N  | -0.05720 | 1.75409  | -0.63434 |
| C  | 0.99676  | 2.57660  | -0.33288 |
| C  | 1.00269  | 3.93210  | -0.70194 |
| H  | 1.87080  | 4.54919  | -0.45444 |
| C  | -0.10832 | 4.48103  | -1.35092 |
| H  | -0.11896 | 5.53393  | -1.64762 |
| C  | -1.22069 | 3.66170  | -1.57964 |
| H  | -2.12546 | 4.05780  | -2.04854 |
| C  | -1.17679 | 2.31078  | -1.20440 |
| C  | 2.10345  | 2.00082  | 0.50092  |
| H  | 3.04221  | 2.55798  | 0.35247  |
| H  | 1.82570  | 2.11981  | 1.56464  |
| C  | -2.36462 | 1.40971  | -1.37184 |
| H  | -3.29835 | 1.99061  | -1.44728 |
| H  | -2.26083 | 0.81848  | -2.29879 |
| C  | 3.64701  | 0.16554  | -1.21270 |
| C  | 2.98162  | 0.96167  | -2.36170 |
| H  | 2.90144  | 2.03745  | -2.13659 |
| H  | 3.60491  | 0.86526  | -3.26926 |
| H  | 1.97236  | 0.58943  | -2.60594 |
| C  | 4.97686  | 0.85407  | -0.83451 |
| H  | 5.60586  | 0.21564  | -0.19559 |
| H  | 5.54668  | 1.04157  | -1.76334 |
| H  | 4.85009  | 1.82781  | -0.33433 |
| C  | 3.97804  | -1.25273 | -1.72254 |
| H  | 3.10510  | -1.76080 | -2.15602 |
| H  | 4.73499  | -1.16949 | -2.52395 |
| H  | 4.40623  | -1.89911 | -0.93997 |
| C  | 3.12284  | -0.36173 | 1.95954  |
| C  | 2.00852  | -0.23026 | 3.02504  |
| H  | 1.12654  | -0.84029 | 2.77873  |
| H  | 2.41404  | -0.57973 | 3.99254  |
| H  | 1.68827  | 0.81544  | 3.17695  |
| C  | 3.57375  | -1.83662 | 1.89765  |
| H  | 4.39004  | -1.99904 | 1.17464  |
| H  | 3.95836  | -2.13494 | 2.89006  |
| H  | 2.73335  | -2.50600 | 1.65421  |
| C  | 4.30740  | 0.53534  | 2.38259  |
| H  | 4.05237  | 1.60827  | 2.39198  |
| H  | 4.59015  | 0.26591  | 3.41661  |
| H  | 5.19963  | 0.39637  | 1.75717  |
| C  | -3.87493 | -1.00494 | -0.48332 |
| C  | -3.67677 | -1.38090 | -1.97275 |
| H  | -2.65421 | -1.71874 | -2.20170 |
| H  | -4.36375 | -2.20757 | -2.22765 |
| H  | -3.91999 | -0.54310 | -2.64706 |
| C  | -3.86285 | -2.27807 | 0.39797  |
| H  | -4.24416 | -2.07709 | 1.40971  |
| H  | -4.52530 | -3.03817 | -0.05477 |
| H  | -2.85702 | -2.70981 | 0.50794  |
| C  | -5.24832 | -0.30846 | -0.36283 |
| H  | -5.30479 | 0.62917  | -0.94130 |
| H  | -6.01818 | -0.98777 | -0.77346 |
| H  | -5.53052 | -0.09816 | 0.67980  |
| C  | -2.81574 | 1.11770  | 1.65156  |

C -1.52260 1.75883 2.20978  
 H -1.15271 2.57898 1.57485  
 H -1.74909 2.18816 3.20325  
 H -0.71825 1.01306 2.32869  
 C -3.84558 2.24118 1.40535  
 H -4.81052 1.87826 1.02429  
 H -4.04450 2.75140 2.36578  
 H -3.46064 3.00705 0.71087  
 C -3.33254 0.11663 2.70951  
 H -3.41729 0.64012 3.67902  
 H -4.33078 -0.28009 2.47002  
 H -2.63778 -0.72947 2.84713  
 C -0.15481 -2.04112 0.87869  
 C -0.30603 -2.88605 1.78533  
 H -0.41590 -3.62190 2.56210  
 C 0.18616 -2.88561 -1.14029  
 C 0.26976 -2.09562 -2.44341  
 H 1.09727 -1.37545 -2.46736  
 H 0.44963 -2.83780 -3.25496  
 H -0.66402 -1.57080 -2.69114  
 C -0.98609 -3.84711 -1.14831  
 H -0.83869 -4.50941 -2.02763  
 H -1.02259 -4.46845 -0.24410  
 H -1.95570 -3.35419 -1.28493  
 C 1.48440 -3.57719 -0.76772  
 H 1.34496 -4.27442 0.06929  
 H 1.81845 -4.15249 -1.65667  
 H 2.28659 -2.87661 -0.51256

**Fc-tBu**

SCF (BP86) Energy = -1315.36066149  
 Enthalpy 0K = -1314.620224  
 Enthalpy 298K = -1314.575252  
 Free Energy 298K = -1314.690048  
 Lowest Frequency = 18.8888 cm<sup>-1</sup>  
 Second Frequency = 38.0231 cm<sup>-1</sup>  
 SCF (BP86-D3BJ) Energy = -  
 1315.655218  
 SCF (FB) Energy = -1315.471692  
 SCF (DFB) Energy = -1315.47812  
 SCF (BS2) Energy = -1985.027935

Rh -0.07153 -0.50051 -0.06287  
 P 2.38526 -0.05216 0.25489  
 P -2.41384 0.04537 0.02593  
 N 0.00089 1.69202 -0.49304  
 C 1.05315 2.44506 -0.04521  
 C 1.07778 3.84128 -0.20660  
 H 1.94499 4.40678 0.14551  
 C -0.01899 4.49186 -0.78139  
 H -0.01373 5.57681 -0.92221  
 C -1.14549 3.73263 -1.12261  
 H -2.04782 4.20924 -1.51505  
 C -1.11723 2.33992 -0.95047  
 C 2.12173 1.74984 0.75520  
 H 3.06271 2.32284 0.74085  
 H 1.78629 1.71906 1.80885  
 C -2.33699 1.49908 -1.19385  
 H -3.24958 2.11766 -1.17542  
 H -2.28489 1.01986 -2.18807  
 C 3.76772 0.25367 -1.15386  
 C 3.23615 1.36898 -2.08680  
 H 3.26298 2.36266 -1.61233  
 H 3.89217 1.41966 -2.97461

H 2.21086 1.19068 -2.44612  
 C 5.10555 0.74092 -0.55419  
 H 5.67124 -0.07673 -0.08351  
 H 5.72651 1.12691 -1.38364  
 H 4.99756 1.56006 0.17461  
 C 4.06900 -1.00215 -1.99981  
 H 3.22893 -1.29511 -2.64479  
 H 4.92202 -0.77026 -2.66361  
 H 4.36242 -1.87138 -1.38936  
 C 3.16500 -0.81782 1.87439  
 C 2.05739 -0.81543 2.95373  
 H 1.15224 -1.35072 2.63030  
 H 2.45321 -1.33323 3.84682  
 H 1.78845 0.20546 3.27843  
 C 3.55608 -2.27682 1.55220  
 H 4.35806 -2.33809 0.79736  
 H 3.93708 -2.75856 2.47088  
 H 2.68821 -2.86059 1.20486  
 C 4.37448 -0.04680 2.45047  
 H 4.17368 1.02989 2.58427  
 H 4.58739 -0.45704 3.45429  
 H 5.29027 -0.16066 1.85713  
 C -4.10228 -0.80917 -0.53563  
 C -4.23169 -0.75316 -2.07990  
 H -3.34849 -1.10701 -2.63109  
 H -5.07375 -1.40437 -2.37456  
 H -4.47254 0.26245 -2.43445  
 C -4.12356 -2.27045 -0.03481  
 H -4.07914 -2.33412 1.06250  
 H -5.07039 -2.74015 -0.35796  
 H -3.29401 -2.86624 -0.43650  
 C -5.34103 -0.06330 0.01437  
 H -5.36785 0.99768 -0.28448  
 H -6.23741 -0.54151 -0.42146  
 H -5.44366 -0.12984 1.10659  
 C -2.64395 0.78668 1.82461  
 C -1.25404 1.22236 2.34978  
 H -0.88480 2.13603 1.86060  
 H -1.34289 1.43857 3.43053  
 H -0.50251 0.41596 2.24284  
 C -3.57485 2.01608 1.88390  
 H -4.61956 1.79259 1.63244  
 H -3.56584 2.40831 2.91768  
 H -3.22258 2.83189 1.22955  
 C -3.13739 -0.35471 2.74519  
 H -3.13140 0.01050 3.78831  
 H -4.16508 -0.67769 2.52372  
 H -2.46936 -1.23168 2.69100  
 C -0.30091 -2.14549 0.94838  
 C -0.51226 -3.14043 1.65306  
 H -0.65190 -3.99705 2.28751  
 C 0.09368 -1.90176 -1.75201  
 C 0.29052 -0.96047 -2.93749  
 H 1.20694 -0.35980 -2.86362  
 H 0.37023 -1.56450 -3.86641  
 H -0.56558 -0.27843 -3.07644  
 C -1.15825 -2.75163 -1.94566  
 H -0.99899 -3.39859 -2.83288  
 H -1.34050 -3.40306 -1.07985  
 H -2.05269 -2.15272 -2.14620  
 C 1.26388 -2.86711 -1.52901  
 H 1.00879 -3.61325 -0.76328  
 H 1.46265 -3.40159 -2.48112  
 H 2.19310 -2.37668 -1.22629

9<sub>o</sub>

SCF (BP86) Energy = -2617.37083069  
 Enthalpy 0K = -2616.080830  
 Enthalpy 298K = -2615.999755  
 Free Energy 298K = -2616.193459  
 Lowest Frequency = 10.7412 cm<sup>-1</sup>  
 Second Frequency = 15.1242 cm<sup>-1</sup>  
 SCF (BP86-D3BJ) Energy = -2617.80779  
 SCF (FB) Energy = -2617.495255  
 SCF (DFB) Energy = -2617.512123  
 SCF (BS2) Energy = -3956.582084

|    |          |          |          |
|----|----------|----------|----------|
| Rh | 2.75469  | -2.03675 | 1.15829  |
| P  | 4.02833  | -2.84698 | -0.62848 |
| P  | 2.03521  | -1.69508 | 3.40281  |
| N  | 4.07000  | -3.33930 | 2.18531  |
| C  | 1.20827  | -1.38514 | -0.27483 |
| H  | 1.57293  | -1.74683 | -1.24618 |
| C  | 1.87025  | -0.24072 | 0.23584  |
| H  | 2.71598  | 0.14022  | -0.35437 |
| C  | 1.17746  | 0.86858  | 1.01191  |
| H  | 1.93826  | 1.51883  | 1.47564  |
| H  | 0.56438  | 0.46110  | 1.83381  |
| C  | -0.25426 | -1.73510 | -0.07389 |
| H  | -0.56186 | -1.59581 | 0.97481  |
| H  | -0.40269 | -2.80580 | -0.29933 |
| C  | 5.13093  | -3.92665 | 1.54600  |
| C  | 6.02688  | -4.79113 | 2.18866  |
| H  | 6.85114  | -5.22387 | 1.61994  |
| C  | 5.81471  | -5.07288 | 3.54332  |
| H  | 6.49423  | -5.74755 | 4.07198  |
| C  | 4.73739  | -4.49480 | 4.22333  |
| H  | 4.53808  | -4.68450 | 5.27898  |
| C  | 3.89232  | -3.63044 | 3.51195  |
| O  | 5.31810  | -3.66238 | 0.23748  |
| O  | 2.85950  | -3.06338 | 4.15618  |
| C  | 3.34877  | -4.37571 | -1.61640 |
| C  | 2.36767  | -5.07739 | -0.64650 |
| H  | 2.88203  | -5.47062 | 0.24627  |
| H  | 1.90734  | -5.93742 | -1.16591 |
| H  | 1.56425  | -4.40361 | -0.30410 |
| C  | 4.46692  | -5.36724 | -2.00650 |
| H  | 5.17173  | -4.95178 | -2.74071 |
| H  | 3.99238  | -6.25176 | -2.46842 |
| H  | 5.03939  | -5.71291 | -1.13322 |
| C  | 2.59659  | -3.91605 | -2.88466 |
| H  | 1.79902  | -3.18288 | -2.67564 |
| H  | 2.11096  | -4.79793 | -3.34002 |
| H  | 3.27466  | -3.49344 | -3.64296 |
| C  | 5.16053  | -1.68441 | -1.66126 |
| C  | 5.84130  | -0.76199 | -0.62112 |
| H  | 5.10695  | -0.23049 | 0.00831  |
| H  | 6.44451  | -0.00782 | -1.15752 |
| H  | 6.51972  | -1.32478 | 0.03944  |
| C  | 4.29654  | -0.83946 | -2.62447 |
| H  | 3.82255  | -1.44629 | -3.41102 |
| H  | 4.95247  | -0.10628 | -3.12694 |
| H  | 3.51039  | -0.26713 | -2.10445 |
| C  | 6.23554  | -2.45407 | -2.45689 |
| H  | 6.81069  | -3.14499 | -1.82152 |
| H  | 6.94570  | -1.72145 | -2.88109 |
| H  | 5.80800  | -3.01654 | -3.30188 |
| C  | 0.31764  | -2.18071 | 4.15249  |

|    |          |          |          |
|----|----------|----------|----------|
| C  | -0.05136 | -3.51914 | 3.46825  |
| H  | -0.06310 | -3.43661 | 2.36855  |
| H  | -1.06100 | -3.82217 | 3.79938  |
| H  | 0.64733  | -4.32328 | 3.74708  |
| C  | -0.75115 | -1.11545 | 3.82766  |
| H  | -0.54895 | -0.14902 | 4.31381  |
| H  | -1.72485 | -1.47659 | 4.20481  |
| H  | -0.86618 | -0.94370 | 2.74514  |
| C  | 0.38736  | -2.38428 | 5.68163  |
| H  | 1.17944  | -3.08999 | 5.97276  |
| H  | -0.57665 | -2.80648 | 6.01917  |
| H  | 0.53356  | -1.43760 | 6.22578  |
| C  | 2.91679  | -0.27113 | 4.41077  |
| C  | 4.09703  | 0.20144  | 3.52861  |
| H  | 4.83012  | -0.60404 | 3.35561  |
| H  | 4.62431  | 1.02339  | 4.04648  |
| H  | 3.76468  | 0.56988  | 2.54439  |
| C  | 3.47620  | -0.77693 | 5.75924  |
| H  | 2.69626  | -1.15146 | 6.43743  |
| H  | 3.97208  | 0.07396  | 6.26054  |
| H  | 4.22886  | -1.56868 | 5.62899  |
| C  | 1.94880  | 0.90465  | 4.66693  |
| H  | 2.52567  | 1.74348  | 5.09647  |
| H  | 1.16498  | 0.64570  | 5.39658  |
| H  | 1.46889  | 1.27836  | 3.74857  |
| C  | -1.20827 | 1.38514  | 0.27483  |
| H  | -1.57293 | 1.74683  | 1.24618  |
| C  | -1.87025 | 0.24072  | -0.23584 |
| H  | -2.71598 | -0.14022 | 0.35437  |
| C  | -1.17746 | -0.86858 | -1.01191 |
| H  | -1.93826 | -1.51883 | -1.47564 |
| H  | -0.56438 | -0.46110 | -1.83381 |
| C  | 0.25426  | 1.73510  | 0.07389  |
| H  | 0.56186  | 1.59581  | -0.97481 |
| H  | 0.40269  | 2.80580  | 0.29933  |
| Rh | -2.75469 | 2.03675  | -1.15829 |
| P  | -4.02833 | 2.84698  | 0.62848  |
| P  | -2.03521 | 1.69508  | -3.40281 |
| N  | -4.07000 | 3.33930  | -2.18531 |
| C  | -5.13093 | 3.92665  | -1.54600 |
| C  | -6.02688 | 4.79113  | -2.18866 |
| H  | -6.85114 | 5.22387  | -1.61994 |
| C  | -5.81471 | 5.07288  | -3.54332 |
| H  | -6.49423 | 5.74755  | -4.07198 |
| C  | -4.73739 | 4.49480  | -4.22333 |
| H  | -4.53808 | 4.68450  | -5.27898 |
| C  | -3.89232 | 3.63044  | -3.51195 |
| O  | -5.31810 | 3.66238  | -0.23748 |
| O  | -2.85950 | 3.06338  | -4.15618 |
| C  | -3.34877 | 4.37571  | 1.61640  |
| C  | -2.36767 | 5.07739  | 0.64650  |
| H  | -2.88203 | 5.47062  | -0.24627 |
| H  | -1.90734 | 5.93742  | 1.16591  |
| H  | -1.56425 | 4.40361  | 0.30410  |
| C  | -4.46692 | 5.36724  | 2.00650  |
| H  | -5.17173 | 4.95178  | 2.74071  |
| H  | -3.99238 | 6.25176  | 2.46842  |
| H  | -5.03939 | 5.71291  | 1.13322  |
| C  | -2.59659 | 3.91605  | 2.88466  |
| H  | -1.79902 | 3.18288  | 2.67564  |
| H  | -2.11096 | 4.79793  | 3.34002  |
| H  | -3.27466 | 3.49344  | 3.64296  |
| C  | -5.16053 | 1.68441  | 1.66126  |
| C  | -5.84130 | 0.76199  | 0.62112  |

|   |          |          |          |
|---|----------|----------|----------|
| H | -5.10695 | 0.23049  | -0.00831 |
| H | -6.44451 | 0.00782  | 1.15752  |
| H | -6.51972 | 1.32478  | -0.03944 |
| C | -4.29654 | 0.83946  | 2.62447  |
| H | -3.82255 | 1.44629  | 3.41102  |
| H | -4.95247 | 0.10628  | 3.12694  |
| H | -3.51039 | 0.26713  | 2.10445  |
| C | -6.23554 | 2.45407  | 2.45689  |
| H | -6.81069 | 3.14499  | 1.82152  |
| H | -6.94570 | 1.72145  | 2.88109  |
| H | -5.80800 | 3.01654  | 3.30188  |
| C | -0.31764 | 2.18071  | -4.15249 |
| C | 0.05136  | 3.51914  | -3.46825 |
| H | 0.06310  | 3.43661  | -2.36855 |
| H | 1.06100  | 3.82217  | -3.79938 |
| H | -0.64733 | 4.32328  | -3.74708 |
| C | 0.75115  | 1.11545  | -3.82766 |
| H | 0.54895  | 0.14902  | -4.31381 |
| H | 1.72485  | 1.47659  | -4.20481 |
| H | 0.86618  | 0.94370  | -2.74514 |
| C | -0.38736 | 2.38428  | -5.68163 |
| H | -1.17944 | 3.08999  | -5.97276 |
| H | 0.57665  | 2.80648  | -6.01917 |
| H | -0.53356 | 1.43760  | -6.22578 |
| C | -2.91679 | 0.27113  | -4.41077 |
| C | -4.09703 | -0.20144 | -3.52861 |
| H | -4.83012 | 0.60404  | -3.35561 |
| H | -4.62431 | -1.02339 | -4.04648 |
| H | -3.76468 | -0.56988 | -2.54439 |
| C | -3.47620 | 0.77693  | -5.75924 |
| H | -2.69626 | 1.15146  | -6.43743 |
| H | -3.97208 | -0.07396 | -6.26054 |
| H | -4.22886 | 1.56868  | -5.62899 |
| C | -1.94880 | -0.90465 | -4.66693 |
| H | -2.52567 | -1.74348 | -5.09647 |
| H | -1.16498 | -0.64570 | -5.39658 |
| H | -1.46889 | -1.27836 | -3.74857 |

### 8.

SCF (BP86) Energy = -1464.72451816

Enthalpy 0K = -1463.992143

Enthalpy 298K = -1463.947274

Free Energy 298K = -1464.064842

Lowest Frequency = 18.1088 cm<sup>-1</sup>

Second Frequency = 26.4435 cm<sup>-1</sup>

SCF (BP86-D3BJ) Energy = -  
1464.956261

SCF (FB) Energy = -1464.764617

SCF (DFB) Energy = -1464.770104

SCF (BS2) Energy = -2134.367708

|   |          |         |          |
|---|----------|---------|----------|
| C | 2.88639  | 4.41089 | 0.38931  |
| H | 3.91954  | 4.70427 | 0.61640  |
| C | 2.45792  | 4.58215 | -0.87857 |
| H | 3.17113  | 5.00425 | -1.59832 |
| C | 1.08808  | 4.24106 | -1.43343 |
| H | 0.98931  | 4.68412 | -2.43839 |
| H | 0.29698  | 4.70964 | -0.81449 |
| C | 2.09755  | 3.82691 | 1.54604  |
| H | 1.11198  | 4.32595 | 1.62989  |
| H | 2.62828  | 4.04105 | 2.48867  |
| C | -0.01118 | 2.21116 | -0.35481 |
| H | -1.05488 | 2.54921 | -0.41945 |
| C | 0.46227  | 1.96922 | 0.95543  |

|    |          |          |          |
|----|----------|----------|----------|
| H  | -0.27317 | 2.07677  | 1.76619  |
| C  | 1.87299  | 2.27690  | 1.42565  |
| H  | 2.03641  | 1.80296  | 2.40879  |
| H  | 2.62833  | 1.86678  | 0.73591  |
| C  | 0.80480  | 2.69908  | -1.53324 |
| H  | 1.76003  | 2.15842  | -1.61450 |
| H  | 0.24389  | 2.48882  | -2.46191 |
| Rh | -0.14766 | 0.04047  | 0.06270  |
| P  | -2.46198 | 0.24957  | 0.09594  |
| P  | 2.00287  | -0.96863 | -0.02790 |
| N  | -0.70209 | -1.98116 | -0.18091 |
| C  | -2.00834 | -2.37612 | -0.05518 |
| C  | -2.41885 | -3.70850 | -0.20104 |
| H  | -3.47518 | -3.95595 | -0.08742 |
| C  | -1.44580 | -4.66935 | -0.50035 |
| H  | -1.73568 | -5.71683 | -0.62438 |
| C  | -0.10534 | -4.29629 | -0.64163 |
| H  | 0.68436  | -5.01293 | -0.87142 |
| C  | 0.22834  | -2.94352 | -0.46926 |
| O  | -2.94041 | -1.44128 | 0.21650  |
| O  | 1.51212  | -2.57596 | -0.59463 |
| C  | -3.37750 | 0.66691  | -1.56585 |
| C  | -2.41000 | 0.20126  | -2.68079 |
| H  | -2.25570 | -0.89075 | -2.66155 |
| H  | -2.84895 | 0.45574  | -3.66274 |
| H  | -1.42133 | 0.68352  | -2.60317 |
| C  | -4.71427 | -0.09316 | -1.71155 |
| H  | -5.47669 | 0.23950  | -0.99256 |
| H  | -5.10921 | 0.10279  | -2.72493 |
| H  | -4.58764 | -1.18077 | -1.60512 |
| C  | -3.62850 | 2.18593  | -1.68944 |
| H  | -2.71209 | 2.78915  | -1.57985 |
| H  | -4.02860 | 2.39142  | -2.69880 |
| H  | -4.37663 | 2.54719  | -0.96607 |
| C  | -3.38551 | 0.86117  | 1.66811  |
| C  | -2.68940 | 0.13810  | 2.84654  |
| H  | -1.60119 | 0.31998  | 2.86055  |
| H  | -3.11370 | 0.51570  | 3.79417  |
| H  | -2.85758 | -0.95018 | 2.81223  |
| C  | -3.20118 | 2.38941  | 1.81054  |
| H  | -3.71482 | 2.95516  | 1.01825  |
| H  | -3.63904 | 2.70538  | 2.77428  |
| H  | -2.14180 | 2.69359  | 1.82258  |
| C  | -4.88739 | 0.50926  | 1.65710  |
| H  | -5.06482 | -0.55822 | 1.45331  |
| H  | -5.30586 | 0.73393  | 2.65498  |
| H  | -5.45137 | 1.11144  | 0.92738  |
| C  | 3.31855  | -0.74703 | -1.43117 |
| C  | 2.49270  | -0.66174 | -2.73763 |
| H  | 1.74480  | 0.14770  | -2.70541 |
| H  | 3.17941  | -0.45810 | -3.57894 |
| H  | 1.97059  | -1.60799 | -2.95062 |
| C  | 4.13236  | 0.55151  | -1.23833 |
| H  | 4.75935  | 0.52993  | -0.33422 |
| H  | 4.81112  | 0.66340  | -2.10304 |
| H  | 3.50797  | 1.45815  | -1.20260 |
| C  | 4.28568  | -1.94824 | -1.51120 |
| H  | 3.75471  | -2.90877 | -1.59066 |
| H  | 4.90611  | -1.83153 | -2.41844 |
| H  | 4.97487  | -1.98907 | -0.65279 |
| C  | 2.80612  | -1.53803 | 1.66208  |
| C  | 1.70177  | -1.36227 | 2.73151  |
| H  | 0.81978  | -1.98983 | 2.51939  |
| H  | 2.10278  | -1.67153 | 3.71427  |



|   |         |          |         |
|---|---------|----------|---------|
| H | 1.35908 | -0.31838 | 2.81214 |
| C | 3.23078 | -3.02336 | 1.62987 |
| H | 3.99624 | -3.23627 | 0.87003 |
| H | 3.66220 | -3.27306 | 2.61635 |
| H | 2.37872 | -3.69823 | 1.45884 |
| C | 4.02903 | -0.66520 | 2.01945 |
| H | 4.34738 | -0.91644 | 3.04748 |
| H | 4.88777 | -0.86300 | 1.35849 |
| H | 3.81260 | 0.41384  | 2.00162 |

**A<sub>o</sub>**

SCF (BP86) Energy = -1152.65482641  
 Enthalpy 0K = -1152.100117  
 Enthalpy 298K = -1152.063943  
 Free Energy 298K = -1152.164526  
 Lowest Frequency = 20.3372 cm<sup>-1</sup>  
 Second Frequency = 31.2022 cm<sup>-1</sup>  
 SCF (BP86-D3BJ) Energy = -  
 1152.821592  
 SCF (FB) Energy = -1152.703619  
 SCF (DFB) Energy = -1152.711718  
 SCF (BS2) Energy = -1822.227633

|    |          |          |          |
|----|----------|----------|----------|
| Rh | 0.00000  | -0.57528 | 0.10578  |
| P  | 2.28202  | -0.30044 | 0.05120  |
| P  | -2.28202 | -0.30044 | 0.05120  |
| N  | 0.00000  | 1.40174  | -0.13732 |
| C  | 1.18250  | 2.10813  | -0.22983 |
| C  | 1.21181  | 3.49636  | -0.41054 |
| H  | 2.18071  | 3.99385  | -0.47595 |
| C  | 0.00000  | 4.18928  | -0.50024 |
| H  | 0.00000  | 5.27348  | -0.64204 |
| C  | -1.21181 | 3.49636  | -0.41054 |
| H  | -2.18070 | 3.99386  | -0.47595 |
| C  | -1.18250 | 2.10813  | -0.22983 |
| O  | 2.35554  | 1.44590  | -0.13995 |
| O  | -2.35554 | 1.44590  | -0.13995 |
| C  | 3.17744  | -0.89649 | -1.53424 |
| C  | 2.48271  | -0.16531 | -2.70695 |
| H  | 2.70280  | 0.91407  | -2.70594 |
| H  | 2.85585  | -0.58686 | -3.65734 |
| H  | 1.38712  | -0.30228 | -2.68050 |
| C  | 4.69260  | -0.62389 | -1.56772 |
| H  | 5.24288  | -1.21371 | -0.81742 |
| H  | 5.08232  | -0.91628 | -2.55963 |
| H  | 4.92613  | 0.44315  | -1.42265 |
| C  | 2.88591  | -2.41426 | -1.63367 |
| H  | 1.80002  | -2.62038 | -1.64221 |
| H  | 3.30039  | -2.79611 | -2.58386 |
| H  | 3.34694  | -2.99452 | -0.81803 |
| C  | 3.30022  | -0.47383 | 1.66478  |
| C  | 2.35315  | 0.00896  | 2.79008  |
| H  | 1.41181  | -0.56697 | 2.81393  |
| H  | 2.86167  | -0.11792 | 3.76275  |
| H  | 2.09951  | 1.07681  | 2.68311  |
| C  | 3.62729  | -1.97084 | 1.86476  |
| H  | 4.35449  | -2.34536 | 1.12608  |
| H  | 4.07754  | -2.10634 | 2.86421  |
| H  | 2.72567  | -2.60832 | 1.82651  |
| C  | 4.58258  | 0.38407  | 1.67322  |
| H  | 4.36707  | 1.44339  | 1.46291  |
| H  | 5.03153  | 0.32788  | 2.68139  |
| H  | 5.33823  | 0.03102  | 0.95727  |
| C  | -3.17744 | -0.89649 | -1.53424 |

|   |          |          |          |
|---|----------|----------|----------|
| C | -2.48270 | -0.16533 | -2.70695 |
| H | -1.38711 | -0.30230 | -2.68049 |
| H | -2.85584 | -0.58687 | -3.65734 |
| H | -2.70278 | 0.91407  | -2.70595 |
| C | -2.88593 | -2.41426 | -1.63366 |
| H | -3.34696 | -2.99452 | -0.81801 |
| H | -3.30041 | -2.79611 | -2.58384 |
| H | -1.80004 | -2.62039 | -1.64220 |
| C | -4.69260 | -0.62387 | -1.56772 |
| H | -4.92612 | 0.44317  | -1.42267 |
| H | -5.08232 | -0.91627 | -2.55963 |
| H | -5.24288 | -1.21368 | -0.81741 |
| C | -3.30022 | -0.47383 | 1.66478  |
| C | -2.35315 | 0.00897  | 2.79008  |
| H | -2.09952 | 1.07682  | 2.68311  |
| H | -2.86167 | -0.11792 | 3.76275  |
| H | -1.41181 | -0.56697 | 2.81393  |
| C | -4.58259 | 0.38407  | 1.67322  |
| H | -5.33823 | 0.03101  | 0.95727  |
| H | -5.03153 | 0.32788  | 2.68139  |
| H | -4.36707 | 1.44339  | 1.46291  |
| C | -3.62729 | -1.97084 | 1.86476  |
| H | -4.07754 | -2.10634 | 2.86421  |
| H | -4.35448 | -2.34536 | 1.12607  |
| H | -2.72566 | -2.60832 | 1.82652  |

**B<sub>o</sub>-tBu**

SCF (BP86) Energy = -1387.29807486  
 Enthalpy 0K = -1386.604571  
 Enthalpy 298K = -1386.559577  
 Free Energy 298K = -1386.676898  
 Lowest Frequency = 23.1101 cm<sup>-1</sup>  
 Second Frequency = 27.6162 cm<sup>-1</sup>  
 SCF (BP86-D3BJ) Energy = -  
 1387.516554  
 SCF (FB) Energy = -1387.33849  
 SCF (DFB) Energy = -1387.34399  
 SCF (BS2) Energy = -2056.924554

|    |          |          |          |
|----|----------|----------|----------|
| Rh | -0.00009 | 0.11249  | 0.16550  |
| P  | 2.31227  | -0.24084 | 0.06419  |
| P  | -2.31223 | -0.24083 | 0.06424  |
| N  | -0.00004 | -1.96299 | -0.13477 |
| C  | 1.17566  | -2.66846 | -0.19393 |
| C  | 1.21442  | -4.06231 | -0.34477 |
| H  | 2.18109  | -4.56593 | -0.38812 |
| C  | -0.00006 | -4.75291 | -0.42207 |
| H  | -0.00007 | -5.84075 | -0.53701 |
| C  | -1.21454 | -4.06233 | -0.34438 |
| H  | -2.18121 | -4.56598 | -0.38741 |
| C  | -1.17576 | -2.66850 | -0.19342 |
| O  | 2.34072  | -2.00217 | -0.09444 |
| O  | -2.34079 | -2.00227 | -0.09308 |
| C  | 3.42012  | -0.10083 | 1.62579  |
| C  | 2.65270  | -0.86331 | 2.73277  |
| H  | 2.61629  | -1.94612 | 2.53249  |
| H  | 3.17837  | -0.71541 | 3.69310  |
| H  | 1.61890  | -0.49671 | 2.84892  |
| C  | 4.82175  | -0.71794 | 1.45040  |
| H  | 5.45783  | -0.12295 | 0.77615  |
| H  | 5.32212  | -0.73552 | 2.43570  |
| H  | 4.77912  | -1.75440 | 1.07985  |
| C  | 3.52882  | 1.39548  | 2.00029  |
| H  | 2.54108  | 1.87201  | 2.10772  |

|   |          |          |          |
|---|----------|----------|----------|
| H | 4.05204  | 1.47779  | 2.97003  |
| H | 4.11288  | 1.97146  | 1.26514  |
| C | 3.21837  | 0.15409  | -1.59349 |
| C | 2.12374  | 0.01428  | -2.67907 |
| H | 1.26205  | 0.67533  | -2.48339 |
| H | 2.55331  | 0.28765  | -3.66000 |
| H | 1.75445  | -1.02227 | -2.75806 |
| C | 3.73747  | 1.60620  | -1.55175 |
| H | 4.58689  | 1.72517  | -0.85993 |
| H | 4.09444  | 1.88715  | -2.55892 |
| H | 2.95127  | 2.32616  | -1.26943 |
| C | 4.37087  | -0.82068 | -1.91438 |
| H | 4.04066  | -1.87029 | -1.89841 |
| H | 4.73541  | -0.59694 | -2.93352 |
| H | 5.22452  | -0.71285 | -1.23040 |
| C | -3.42081 | -0.09994 | 1.62524  |
| C | -2.65398 | -0.86188 | 2.73301  |
| H | -1.62026 | -0.49523 | 2.84962  |
| H | -3.18021 | -0.71356 | 3.69297  |
| H | -2.61742 | -1.94477 | 2.53321  |
| C | -3.52984 | 1.39655  | 1.99894  |
| H | -4.11360 | 1.97209  | 1.26319  |
| H | -4.05355 | 1.47930  | 2.96836  |
| H | -2.54221 | 1.87325  | 2.10660  |
| C | -4.82235 | -0.71718 | 1.44949  |
| H | -4.77954 | -1.75373 | 1.07923  |
| H | -5.32306 | -0.73450 | 2.43462  |
| H | -5.45821 | -0.12240 | 0.77485  |
| C | -3.21746 | 0.15336  | -1.59410 |
| C | -2.12240 | 0.01254  | -2.67913 |
| H | -1.75348 | -1.02419 | -2.75748 |
| H | -2.55143 | 0.28562  | -3.66037 |
| H | -1.26053 | 0.67334  | -2.48336 |
| C | -4.37016 | -0.82121 | -1.91484 |
| H | -5.22415 | -0.71243 | -1.23144 |
| H | -4.73404 | -0.59820 | -2.93438 |
| H | -4.04041 | -1.87095 | -1.89779 |
| C | -3.73600 | 1.60570  | -1.55356 |
| H | -4.09264 | 1.88601  | -2.56102 |
| H | -4.58551 | 1.72557  | -0.86201 |
| H | -2.94954 | 2.32554  | -1.27164 |
| C | -0.00043 | 1.64620  | 1.59599  |
| H | -0.00094 | 1.51156  | 2.67265  |
| C | -0.00010 | 2.32205  | 0.51974  |
| C | 0.00008  | 3.64548  | -0.19993 |
| C | 0.00067  | 3.49674  | -1.73695 |
| C | 1.26031  | 4.43723  | 0.24791  |
| H | 1.26279  | 4.59359  | 1.33888  |
| H | 2.19013  | 3.91306  | -0.02646 |
| H | 1.27009  | 5.42589  | -0.24270 |
| H | 0.89281  | 2.95519  | -2.09094 |
| H | 0.00052  | 4.49394  | -2.20847 |
| H | -0.89085 | 2.95458  | -2.09156 |
| C | -1.26065 | 4.43698  | 0.24694  |
| H | -1.26407 | 4.59320  | 1.33793  |
| H | -1.27013 | 5.42570  | -0.24355 |
| H | -2.19017 | 3.91272  | -0.02830 |

**TS (B-10)<sub>o-tBu</sub>**

SCF (BP86) Energy = -1387.22856413  
 Enthalpy 0K = -1386.538460  
 Enthalpy 298K = -1386.493833  
 Free Energy 298K = -1386.611358  
 Lowest Frequency = -590.3387 cm<sup>-1</sup>

Second Frequency = 12.6015 cm<sup>-1</sup>  
 SCF (BP86-D3BJ) Energy = -1387.44418  
 SCF (FB) Energy = -1387.26948  
 SCF (DFB) Energy = -1387.275165  
 SCF (BS2) Energy = -2056.854194

|    |          |          |          |
|----|----------|----------|----------|
| Rh | 0.02479  | 0.11215  | 0.11548  |
| P  | 2.32986  | -0.24047 | 0.06198  |
| P  | -2.29041 | -0.28628 | 0.08266  |
| N  | 0.05166  | -1.88661 | -0.49136 |
| C  | 1.23168  | -2.55248 | -0.71215 |
| C  | 1.28804  | -3.90042 | -1.09027 |
| H  | 2.26133  | -4.36435 | -1.25577 |
| C  | 0.08401  | -4.60018 | -1.22908 |
| H  | 0.09649  | -5.65455 | -1.51971 |
| C  | -1.13395 | -3.95801 | -0.98618 |
| H  | -2.09510 | -4.46702 | -1.07010 |
| C  | -1.11078 | -2.60554 | -0.61333 |
| O  | 2.39186  | -1.88189 | -0.56448 |
| O  | -2.28129 | -1.99282 | -0.37085 |
| C  | 3.21411  | -0.53576 | 1.74833  |
| C  | 2.32305  | -1.55540 | 2.49723  |
| H  | 2.32367  | -2.54307 | 2.00823  |
| H  | 2.72313  | -1.68802 | 3.51850  |
| H  | 1.28233  | -1.19935 | 2.58372  |
| C  | 4.64053  | -1.09971 | 1.59596  |
| H  | 5.34966  | -0.34519 | 1.22034  |
| H  | 5.00011  | -1.41336 | 2.59271  |
| H  | 4.67450  | -1.98173 | 0.93701  |
| C  | 3.23630  | 0.79014  | 2.54160  |
| H  | 2.21829  | 1.16451  | 2.74114  |
| H  | 3.71238  | 0.60200  | 3.52082  |
| H  | 3.82399  | 1.57902  | 2.04397  |
| C  | 3.44506  | 0.55717  | -1.28725 |
| C  | 2.52883  | 0.67283  | -2.52941 |
| H  | 1.59596  | 1.21734  | -2.31264 |
| H  | 3.07278  | 1.21038  | -3.32723 |
| H  | 2.25991  | -0.32187 | -2.92213 |
| C  | 3.88489  | 1.95462  | -0.79958 |
| H  | 4.62932  | 1.89570  | 0.01105  |
| H  | 4.35640  | 2.49804  | -1.63806 |
| H  | 3.03738  | 2.56905  | -0.44843 |
| C  | 4.67845  | -0.29361 | -1.65948 |
| H  | 4.40052  | -1.32392 | -1.92875 |
| H  | 5.15691  | 0.16637  | -2.54319 |
| H  | 5.43228  | -0.32987 | -0.86068 |
| C  | -3.15083 | -0.47661 | 1.79227  |
| C  | -2.18591 | -1.33529 | 2.64459  |
| H  | -1.18926 | -0.86909 | 2.71998  |
| H  | -2.60089 | -1.42010 | 3.66515  |
| H  | -2.07627 | -2.35594 | 2.24316  |
| C  | -3.27743 | 0.92328  | 2.43361  |
| H  | -3.98139 | 1.57783  | 1.89669  |
| H  | -3.66095 | 0.80245  | 3.46278  |
| H  | -2.29759 | 1.42753  | 2.50803  |
| C  | -4.52286 | -1.17445 | 1.70114  |
| H  | -4.45634 | -2.15147 | 1.19619  |
| H  | -4.89350 | -1.35386 | 2.72660  |
| H  | -5.27910 | -0.55944 | 1.18805  |
| C  | -3.50349 | 0.30145  | -1.31134 |
| C  | -2.59531 | 0.71293  | -2.49336 |
| H  | -1.98639 | -0.13285 | -2.85514 |
| H  | -3.22678 | 1.05499  | -3.33331 |
| H  | -1.90651 | 1.53008  | -2.22374 |

C -4.45203 -0.82657 -1.77540  
H -5.10450 -1.19459 -0.97016  
H -5.10227 -0.41642 -2.56948  
H -3.90463 -1.68268 -2.19570  
C -4.33790 1.50678 -0.82675  
H -4.86072 1.94656 -1.69516  
H -5.10941 1.20945 -0.09917  
H -3.72859 2.30378 -0.37368  
C -0.05061 1.66566 1.53192  
H 1.04852 2.34620 1.20049  
C 0.04980 2.41680 0.44161  
C -0.11334 3.76695 -0.24321  
C 0.43499 3.77180 -1.68627  
C 0.64765 4.81393 0.61788  
H 0.25564 4.84893 1.64739  
H 1.72916 4.59584 0.65982  
H 0.52607 5.81286 0.16711  
H 1.52091 3.59102 -1.71375  
H 0.24727 4.75749 -2.14414  
H -0.05961 3.00622 -2.30599  
C -1.61877 4.12854 -0.26314  
H -2.05911 4.09085 0.74622  
H -1.73405 5.15335 -0.65435  
H -2.18067 3.45605 -0.92843

**TS (B-C) o-tBu**

SCF (BP86) Energy = -1387.28468888  
Enthalpy 0K = -1386.593586  
Enthalpy 298K = -1386.548514  
Free Energy 298K = -1386.668911  
Lowest Frequency = -136.0195 cm<sup>-1</sup>  
Second Frequency = 12.9844 cm<sup>-1</sup>  
SCF (BP86-D3BJ) Energy = -  
1387.495595  
SCF (FB) Energy = -1387.324574  
SCF (DFB) Energy = -1387.329988  
SCF (BS2) Energy = -2056.911156

Rh 0.00002 -0.04585 0.20532  
P 2.28076 -0.38253 0.09431  
P -2.28069 -0.38276 0.09430  
N 0.00012 -2.04369 -0.38977  
C 1.17306 -2.72738 -0.57959  
C 1.21328 -4.07716 -0.95569  
H 2.18133 -4.56205 -1.08988  
C 0.00026 -4.74976 -1.14274  
H 0.00031 -5.80363 -1.43499  
C -1.21284 -4.07727 -0.95576  
H -2.18084 -4.56224 -1.08999  
C -1.17276 -2.72748 -0.57965  
O 2.34170 -2.07214 -0.40084  
O -2.34145 -2.07234 -0.40096  
C 3.28246 -0.52890 1.72828  
C 2.46416 -1.50056 2.61290  
H 2.45228 -2.52162 2.19905  
H 2.93006 -1.54742 3.61360  
H 1.42017 -1.16281 2.73649  
C 4.70836 -1.08073 1.53251  
H 5.37233 -0.35395 1.03834  
H 5.14390 -1.29485 2.52543  
H 4.71538 -2.01940 0.95607  
C 3.32679 0.86088 2.40210  
H 2.31938 1.28236 2.55377  
H 3.79608 0.75627 3.39675

H 3.92352 1.59087 1.83294  
C 3.26707 0.36088 -1.37904  
C 2.25143 0.39800 -2.54684  
H 1.34807 0.97680 -2.28864  
H 2.73154 0.86867 -3.42420  
H 1.93354 -0.61512 -2.84477  
C 3.69140 1.79830 -1.00915  
H 4.49977 1.81460 -0.26026  
H 4.07439 2.30390 -1.91398  
H 2.84555 2.39472 -0.62470  
C 4.48853 -0.48230 -1.79975  
H 4.21346 -1.52913 -2.00072  
H 4.89985 -0.05674 -2.73317  
H 5.29380 -0.47041 -1.05137  
C -3.28235 -0.52935 1.72828  
C -2.46395 -1.50101 2.61280  
H -1.41998 -1.16319 2.73637  
H -2.92981 -1.54796 3.61352  
H -2.45201 -2.52204 2.19889  
C -3.32678 0.86037 2.40221  
H -3.92356 1.59037 1.83311  
H -3.79608 0.75565 3.39684  
H -2.31940 1.28191 2.55393  
C -4.70821 -1.08129 1.53249  
H -4.71516 -2.01991 0.95596  
H -5.14371 -1.29553 2.52540  
H -5.37225 -0.35452 1.03840  
C -3.26709 0.36065 -1.37898  
C -2.25148 0.39794 -2.54680  
H -1.93350 -0.61513 -2.84480  
H -2.73164 0.86863 -3.42412  
H -1.34817 0.97680 -2.28857  
C -4.48848 -0.48262 -1.79973  
H -5.29374 -0.47086 -1.05134  
H -4.89985 -0.05703 -2.73311  
H -4.21332 -1.52941 -2.00077  
C -3.69156 1.79800 -1.00900  
H -4.07462 2.30362 -1.91378  
H -4.49991 1.81417 -0.26008  
H -2.84575 2.39448 -0.62453  
C -0.00009 1.86496 1.02429  
H -0.00005 1.51912 2.07305  
C -0.00018 3.01029 0.49365  
C -0.00032 4.33446 -0.13206  
C -0.00055 4.14409 -1.68134  
C 1.27296 5.11995 0.29608  
H 1.30549 5.26061 1.38844  
H 2.19107 4.59793 -0.01705  
H 1.26102 6.11582 -0.17789  
H 0.89517 3.59956 -2.01921  
H -0.00066 5.14192 -2.15143  
H -0.89632 3.59949 -2.01894  
C -1.27354 5.11983 0.29646  
H -1.30577 5.26048 1.38883  
H -1.26182 6.11571 -0.17750  
H -2.19170 4.59774 -0.01641

**Co-tBu**

SCF (BP86) Energy = -1387.29375677  
Enthalpy 0K = -1386.601980  
Enthalpy 298K = -1386.556743  
Free Energy 298K = -1386.678182  
Lowest Frequency = 9.7432 cm<sup>-1</sup>  
Second Frequency = 19.2155 cm<sup>-1</sup>

SCF (BP86-D3BJ) Energy = -  
 1387.501871  
 SCF (FB) Energy = -1387.333129  
 SCF (DFB) Energy = -1387.338486  
 SCF (BS2) Energy = -2056.922584

|    |          |          |          |
|----|----------|----------|----------|
| Rh | -0.00011 | -0.10366 | 0.10463  |
| P  | 2.28958  | -0.43326 | 0.06845  |
| P  | -2.29003 | -0.43159 | 0.06841  |
| N  | -0.00085 | -2.14190 | -0.25206 |
| C  | 1.17756  | -2.83356 | -0.38757 |
| C  | 1.21393  | -4.20990 | -0.65014 |
| H  | 2.17975  | -4.70815 | -0.74463 |
| C  | -0.00184 | -4.89147 | -0.78000 |
| H  | -0.00223 | -5.96589 | -0.98492 |
| C  | -1.21712 | -4.20899 | -0.65027 |
| H  | -2.18330 | -4.70652 | -0.74487 |
| C  | -1.17976 | -2.83267 | -0.38770 |
| O  | 2.34411  | -2.16650 | -0.26170 |
| O  | -2.34582 | -2.16475 | -0.26196 |
| C  | 3.24545  | -0.39615 | 1.73028  |
| C  | 2.47180  | -1.35054 | 2.67093  |
| H  | 2.55443  | -2.40113 | 2.34972  |
| H  | 2.90326  | -1.27227 | 3.68481  |
| H  | 1.40227  | -1.08406 | 2.73358  |
| C  | 4.71232  | -0.85312 | 1.60950  |
| H  | 5.33040  | -0.12890 | 1.05557  |
| H  | 5.14010  | -0.93609 | 2.62499  |
| H  | 4.80294  | -1.84058 | 1.12924  |
| C  | 3.16491  | 1.04496  | 2.28496  |
| H  | 2.12282  | 1.38469  | 2.40582  |
| H  | 3.63835  | 1.06282  | 3.28289  |
| H  | 3.69642  | 1.77568  | 1.65541  |
| C  | 3.28045  | 0.18231  | -1.45392 |
| C  | 2.27797  | 0.10823  | -2.63139 |
| H  | 1.37727  | 0.71565  | -2.44103 |
| H  | 2.77120  | 0.49335  | -3.54224 |
| H  | 1.96400  | -0.92880 | -2.83893 |
| C  | 3.67907  | 1.65309  | -1.20082 |
| H  | 4.46503  | 1.74568  | -0.43350 |
| H  | 4.08599  | 2.07530  | -2.13724 |
| H  | 2.81439  | 2.27161  | -0.90373 |
| C  | 4.51521  | -0.68397 | -1.77807 |
| H  | 4.25171  | -1.74656 | -1.89584 |
| H  | 4.93987  | -0.33483 | -2.73663 |
| H  | 5.30675  | -0.60179 | -1.01952 |
| C  | -3.24576 | -0.39399 | 1.73032  |
| C  | -2.47282 | -1.34916 | 2.67077  |
| H  | -1.40305 | -1.08361 | 2.73332  |
| H  | -2.90410 | -1.27065 | 3.68471  |
| H  | -2.55640 | -2.39963 | 2.34943  |
| C  | -3.16402 | 1.04696  | 2.28522  |
| H  | -3.69487 | 1.77824  | 1.65577  |
| H  | -3.63749 | 1.06507  | 3.28314  |
| H  | -2.12164 | 1.38579  | 2.40620  |
| C  | -4.71301 | -0.84973 | 1.60958  |
| H  | -4.80446 | -1.83706 | 1.12920  |
| H  | -5.14079 | -0.93248 | 2.62508  |
| H  | -5.33052 | -0.12495 | 1.05576  |
| C  | -3.28059 | 0.18486  | -1.45380 |
| C  | -2.27827 | 0.11021  | -2.63135 |
| H  | -1.96505 | -0.92701 | -2.83905 |
| H  | -2.77128 | 0.49580  | -3.54212 |
| H  | -1.37711 | 0.71697  | -2.44099 |

|   |          |          |          |
|---|----------|----------|----------|
| C | -4.51599 | -0.68051 | -1.77794 |
| H | -5.30741 | -0.59786 | -1.01933 |
| H | -4.94048 | -0.33096 | -2.73643 |
| H | -4.25324 | -1.74327 | -1.89586 |
| C | -3.67815 | 1.65590  | -1.20048 |
| H | -4.08487 | 2.07850  | -2.13680 |
| H | -4.46395 | 1.74896  | -0.43306 |
| H | -2.81300 | 2.27378  | -0.90343 |
| C | 0.00066  | 1.92279  | 0.21355  |
| H | 0.00034  | 1.25213  | 1.21864  |
| C | 0.00129  | 3.16668  | 0.11172  |
| C | 0.00212  | 4.62577  | -0.08430 |
| C | 0.00422  | 4.91551  | -1.61454 |
| C | 1.27220  | 5.24338  | 0.56350  |
| H | 1.29971  | 5.05052  | 1.64844  |
| H | 2.18983  | 4.83173  | 0.11230  |
| H | 1.27217  | 6.33575  | 0.40891  |
| H | 0.89923  | 4.49367  | -2.09986 |
| H | 0.00488  | 6.00711  | -1.77505 |
| H | -0.88988 | 4.49442  | -2.10216 |
| C | -1.26908 | 5.24450  | 0.56021  |
| H | -1.29955 | 5.05168  | 1.64508  |
| H | -1.26771 | 6.33687  | 0.40562  |
| H | -2.18590 | 4.83364  | 0.10665  |

**TS (C-D) <sub>o-tBu</sub>**

SCF (BP86) Energy = -1387.22994128  
 Enthalpy 0K = -1386.540024  
 Enthalpy 298K = -1386.495682  
 Free Energy 298K = -1386.612452  
 Lowest Frequency = -48.4631 cm<sup>-1</sup>  
 Second Frequency = 16.1993 cm<sup>-1</sup>  
 SCF (BP86-D3BJ) Energy = -  
 1387.444468  
 SCF (FB) Energy = -1387.271412  
 SCF (DFB) Energy = -1387.277305  
 SCF (BS2) Energy = -2056.856196

|    |          |          |          |
|----|----------|----------|----------|
| Rh | 0.00004  | 0.05567  | 0.02913  |
| P  | -2.31985 | -0.28585 | -0.00464 |
| P  | 2.31990  | -0.28566 | -0.00481 |
| N  | 0.00011  | -2.01684 | -0.09852 |
| C  | -1.17973 | -2.72321 | -0.10544 |
| C  | -1.21493 | -4.12464 | -0.12799 |
| H  | -2.18123 | -4.63070 | -0.13362 |
| C  | 0.00025  | -4.81813 | -0.13959 |
| H  | 0.00031  | -5.91193 | -0.15458 |
| C  | 1.21536  | -4.12449 | -0.12896 |
| H  | 2.18173  | -4.63044 | -0.13535 |
| C  | 1.18002  | -2.72307 | -0.10637 |
| O  | -2.34251 | -2.05156 | -0.10090 |
| O  | 2.34272  | -2.05127 | -0.10274 |
| C  | -3.32338 | 0.06976  | -1.61398 |
| C  | -2.28534 | 0.04275  | -2.76128 |
| H  | -1.79425 | -0.94091 | -2.85111 |
| H  | -2.80472 | 0.24360  | -3.71584 |
| H  | -1.50079 | 0.80648  | -2.62985 |
| C  | -4.40515 | -0.99831 | -1.88473 |
| H  | -5.19082 | -1.01527 | -1.11597 |
| H  | -4.88915 | -0.75510 | -2.84795 |
| H  | -3.97774 | -2.00867 | -1.96796 |
| C  | -3.96401 | 1.47042  | -1.51710 |
| H  | -3.23597 | 2.25308  | -1.24906 |
| H  | -4.38170 | 1.73565  | -2.50493 |

|   |          |          |          |
|---|----------|----------|----------|
| H | -4.79406 | 1.49868  | -0.79347 |
| C | -3.32192 | -0.09004 | 1.62240  |
| C | -2.46789 | -0.78731 | 2.70863  |
| H | -1.46048 | -0.34387 | 2.77676  |
| H | -2.96655 | -0.64545 | 3.68424  |
| H | -2.38176 | -1.87258 | 2.53558  |
| C | -3.43538 | 1.41485  | 1.95551  |
| H | -4.05430 | 1.96645  | 1.23065  |
| H | -3.92171 | 1.51156  | 2.94293  |
| H | -2.44310 | 1.89010  | 2.02155  |
| C | -4.71638 | -0.74345 | 1.54130  |
| H | -4.66831 | -1.79785 | 1.22561  |
| H | -5.16901 | -0.71717 | 2.54898  |
| H | -5.39685 | -0.19797 | 0.86796  |
| C | 3.32361  | 0.07158  | -1.61363 |
| C | 2.28570  | 0.04615  | -2.76108 |
| H | 1.50145  | 0.81008  | -2.62898 |
| H | 2.80528  | 0.24775  | -3.71538 |
| H | 1.79420  | -0.93722 | -2.85196 |
| C | 3.96450  | 1.47200  | -1.51500 |
| H | 4.79469  | 1.49911  | -0.79149 |
| H | 4.38206  | 1.73849  | -2.50255 |
| H | 3.23667  | 2.25444  | -1.24575 |
| C | 4.40518  | -0.99640 | -1.88553 |
| H | 3.97748  | -2.00648 | -1.97058 |
| H | 4.88973  | -0.75180 | -2.84812 |
| H | 5.19046  | -1.01483 | -1.11641 |
| C | 3.32171  | -0.09131 | 1.62260  |
| C | 2.46742  | -0.78954 | 2.70802  |
| H | 2.38121  | -1.87464 | 2.53396  |
| H | 2.96592  | -0.64866 | 3.68385  |
| H | 1.46005  | -0.34605 | 2.77640  |
| C | 4.71612  | -0.74478 | 1.54114  |
| H | 5.39676  | -0.19878 | 0.86839  |
| H | 5.16861  | -0.71940 | 2.54891  |
| H | 4.66800  | -1.79890 | 1.22453  |
| C | 3.43523  | 1.41323  | 1.95722  |
| H | 3.92140  | 1.50891  | 2.94482  |
| H | 4.05431  | 1.96550  | 1.23302  |
| H | 2.44296  | 1.88848  | 2.02358  |
| C | 0.00047  | 1.67308  | 1.43215  |
| H | -0.00027 | 1.68640  | -0.58794 |
| C | 0.00004  | 2.50752  | 0.42473  |
| C | -0.00031 | 3.94521  | -0.06708 |
| C | -0.00090 | 4.83362  | 1.20542  |
| C | -1.26297 | 4.24045  | -0.90975 |
| H | -1.30092 | 3.60974  | -1.81536 |
| H | -2.18026 | 4.07320  | -0.32159 |
| H | -1.25768 | 5.29382  | -1.23830 |
| H | -0.89451 | 4.64587  | 1.82185  |
| H | -0.00096 | 5.89571  | 0.90652  |
| H | 0.89233  | 4.64616  | 1.82249  |
| C | 1.26253  | 4.24130  | -0.90921 |
| H | 1.30141  | 3.61044  | -1.81467 |
| H | 1.25654  | 5.29459  | -1.23797 |
| H | 2.17967  | 4.07490  | -0.32057 |

**D<sub>o</sub>-tBu**

SCF (BP86) Energy = -1387.23016835  
 Enthalpy 0K = -1386.539397  
 Enthalpy 298K = -1386.494342  
 Free Energy 298K = -1386.612997  
 Lowest Frequency = 20.1225 cm<sup>-1</sup>  
 Second Frequency = 21.2946 cm<sup>-1</sup>

SCF (BP86-D3BJ) Energy = -  
 1387.445262  
 SCF (FB) Energy = -1387.272307  
 SCF (DFB) Energy = -1387.278507  
 SCF (BS2) Energy = -2056.856702

|    |          |          |          |
|----|----------|----------|----------|
| Rh | -0.00001 | 0.06477  | -0.02880 |
| P  | -2.32579 | -0.27632 | -0.03406 |
| P  | 2.32571  | -0.27651 | -0.03399 |
| N  | -0.00009 | -1.99756 | 0.11217  |
| C  | -1.18032 | -2.70298 | 0.16875  |
| C  | -1.21478 | -4.09872 | 0.29607  |
| H  | -2.18151 | -4.60203 | 0.34045  |
| C  | -0.00023 | -4.78965 | 0.36197  |
| H  | -0.00028 | -5.87879 | 0.46369  |
| C  | 1.21440  | -4.09881 | 0.29651  |
| H  | 2.18107  | -4.60219 | 0.34123  |
| C  | 1.18009  | -2.70306 | 0.16919  |
| O  | -2.34457 | -2.03848 | 0.09343  |
| O  | 2.34439  | -2.03863 | 0.09442  |
| C  | -3.25397 | -0.12195 | -1.71741 |
| C  | -2.17354 | -0.36117 | -2.79957 |
| H  | -1.74117 | -1.37411 | -2.73489 |
| H  | -2.63946 | -0.26347 | -3.79693 |
| H  | -1.35074 | 0.37103  | -2.73200 |
| C  | -4.37739 | -1.16724 | -1.88396 |
| H  | -5.20770 | -1.01766 | -1.17941 |
| H  | -4.78810 | -1.06769 | -2.90507 |
| H  | -4.00469 | -2.19648 | -1.77032 |
| C  | -3.81877 | 1.30854  | -1.84907 |
| H  | -3.05790 | 2.08481  | -1.66325 |
| H  | -4.18605 | 1.44930  | -2.88148 |
| H  | -4.67065 | 1.48313  | -1.17279 |
| C  | -3.38963 | 0.11420  | 1.51732  |
| C  | -2.58589 | -0.44978 | 2.71349  |
| H  | -1.57863 | -0.00406 | 2.76963  |
| H  | -3.12551 | -0.18927 | 3.64175  |
| H  | -2.50479 | -1.54841 | 2.67527  |
| C  | -3.51223 | 1.64819  | 1.66104  |
| H  | -4.09066 | 2.10783  | 0.84410  |
| H  | -4.04934 | 1.86160  | 2.60273  |
| H  | -2.52272 | 2.12831  | 1.72228  |
| C  | -4.78326 | -0.54303 | 1.45373  |
| H  | -4.72974 | -1.62556 | 1.25671  |
| H  | -5.27163 | -0.40678 | 2.43547  |
| H  | -5.43508 | -0.07209 | 0.70069  |
| C  | 3.25352  | -0.12306 | -1.71763 |
| C  | 2.17281  | -0.36290 | -2.79939 |
| H  | 1.34983  | 0.36912  | -2.73182 |
| H  | 2.63840  | -0.26544 | -3.79692 |
| H  | 1.74071  | -1.37594 | -2.73423 |
| C  | 3.81820  | 1.30739  | -1.85016 |
| H  | 4.67026  | 1.48236  | -1.17420 |
| H  | 4.18518  | 1.44767  | -2.88273 |
| H  | 3.05733  | 2.08369  | -1.66449 |
| C  | 4.37694  | -1.16838 | -1.88391 |
| H  | 4.00439  | -2.19757 | -1.76935 |
| H  | 4.78721  | -1.06955 | -2.90526 |
| H  | 5.20754  | -1.01820 | -1.17983 |
| C  | 3.38991  | 0.11462  | 1.51698  |
| C  | 2.58654  | -0.44897 | 2.71358  |
| H  | 2.50559  | -1.54762 | 2.67581  |
| H  | 3.12635  | -0.18799 | 3.64160  |
| H  | 1.57923  | -0.00337 | 2.76979  |

|   |          |          |          |
|---|----------|----------|----------|
| C | 4.78356  | -0.54255 | 1.45323  |
| H | 5.43513  | -0.07183 | 0.69984  |
| H | 5.27219  | -0.40592 | 2.43479  |
| H | 4.73007  | -1.62515 | 1.25661  |
| C | 3.51248  | 1.64867  | 1.66004  |
| H | 4.05001  | 1.86251  | 2.60140  |
| H | 4.09050  | 2.10803  | 0.84264  |
| H | 2.52296  | 2.12874  | 1.72154  |
| C | 0.00008  | 1.62175  | 1.46138  |
| H | -0.00116 | 1.71522  | -0.62866 |
| C | -0.00013 | 2.42344  | 0.41612  |
| C | 0.00038  | 3.88810  | -0.01737 |
| C | 0.00113  | 4.73477  | 1.28065  |
| C | -1.26149 | 4.20841  | -0.85225 |
| H | -1.28375 | 3.62182  | -1.78818 |
| H | -2.18158 | 3.99991  | -0.28187 |
| H | -1.26836 | 5.27603  | -1.13148 |
| H | -0.89141 | 4.52722  | 1.89248  |
| H | 0.00146  | 5.80659  | 1.01879  |
| H | 0.89393  | 4.52653  | 1.89188  |
| C | 1.26193  | 4.20739  | -0.85308 |
| H | 1.28313  | 3.62073  | -1.78899 |
| H | 1.26940  | 5.27499  | -1.13238 |
| H | 2.18224  | 3.99825  | -0.28329 |

**TS (C-10)<sub>o-tBu</sub>**

SCF (BP86) Energy = -1387.27797551  
 Enthalpy 0K = -1386.588668  
 Enthalpy 298K = -1386.543222  
 Free Energy 298K = -1386.665148  
 Lowest Frequency = -743.9309 cm<sup>-1</sup>  
 Second Frequency = 13.7542 cm<sup>-1</sup>  
 SCF (BP86-D3BJ) Energy = -1387.48558  
 SCF (FB) Energy = -1387.317865  
 SCF (DFB) Energy = -1387.323448  
 SCF (BS2) Energy = -2056.905489

|    |          |          |          |
|----|----------|----------|----------|
| Rh | 0.00204  | -0.08086 | 0.04590  |
| P  | 2.28143  | -0.40518 | 0.01550  |
| P  | -2.27223 | -0.44132 | 0.02910  |
| N  | 0.01829  | -2.16194 | -0.05271 |
| C  | 1.19825  | -2.85383 | -0.14084 |
| C  | 1.24830  | -4.25278 | -0.21867 |
| H  | 2.21776  | -4.74871 | -0.28394 |
| C  | 0.03944  | -4.95880 | -0.20994 |
| H  | 0.04775  | -6.05090 | -0.27048 |
| C  | -1.18000 | -4.27638 | -0.12588 |
| H  | -2.14187 | -4.79097 | -0.11887 |
| C  | -1.15123 | -2.87672 | -0.04956 |
| O  | 2.35863  | -2.16107 | -0.15617 |
| O  | -2.32188 | -2.20693 | 0.03571  |
| C  | 3.26413  | -0.22664 | 1.65732  |
| C  | 2.49289  | -1.08720 | 2.68654  |
| H  | 2.56974  | -2.16295 | 2.46174  |
| H  | 2.93010  | -0.91987 | 3.68733  |
| H  | 1.42422  | -0.81200 | 2.72845  |
| C  | 4.72672  | -0.70296 | 1.56709  |
| H  | 5.34841  | -0.02885 | 0.95658  |
| H  | 5.15977  | -0.71235 | 2.58389  |
| H  | 4.80656  | -1.72450 | 1.16239  |
| C  | 3.19991  | 1.25566  | 2.08930  |
| H  | 2.15806  | 1.59886  | 2.20519  |
| H  | 3.69595  | 1.36073  | 3.07092  |
| H  | 3.71413  | 1.92994  | 1.38606  |

|   |          |          |          |
|---|----------|----------|----------|
| C | 3.26910  | 0.06835  | -1.56129 |
| C | 2.26862  | -0.13128 | -2.72581 |
| H | 1.35196  | 0.46667  | -2.58633 |
| H | 2.75255  | 0.18128  | -3.66907 |
| H | 1.97695  | -1.18926 | -2.83584 |
| C | 3.65469  | 1.56036  | -1.45687 |
| H | 4.43837  | 1.73712  | -0.70194 |
| H | 4.05806  | 1.89332  | -2.43015 |
| H | 2.78469  | 2.19813  | -1.22192 |
| C | 4.51363  | -0.80999 | -1.80670 |
| H | 4.26285  | -1.88209 | -1.80984 |
| H | 4.92618  | -0.55846 | -2.80059 |
| H | 5.31024  | -0.63938 | -1.06849 |
| C | -3.30355 | -0.14127 | 1.62167  |
| C | -2.33331 | -0.44987 | 2.78761  |
| H | -1.42041 | 0.16790  | 2.73970  |
| H | -2.84721 | -0.24364 | 3.74403  |
| H | -2.02757 | -1.50936 | 2.79413  |
| C | -3.71127 | 1.34780  | 1.66129  |
| H | -4.48196 | 1.58884  | 0.91110  |
| H | -4.13886 | 1.57546  | 2.65425  |
| H | -2.85081 | 2.02290  | 1.50890  |
| C | -4.54091 | -1.05530 | 1.74049  |
| H | -4.27392 | -2.11888 | 1.64240  |
| H | -4.98585 | -0.91105 | 2.74173  |
| H | -5.31792 | -0.82015 | 0.99934  |
| C | -3.21874 | -0.11749 | -1.61110 |
| C | -2.38784 | -0.83888 | -2.69958 |
| H | -2.42661 | -1.93444 | -2.58831 |
| H | -2.80705 | -0.58632 | -3.69016 |
| H | -1.33082 | -0.51964 | -2.68312 |
| C | -4.66535 | -0.64681 | -1.62041 |
| H | -5.32856 | -0.06122 | -0.96401 |
| H | -5.06699 | -0.56117 | -2.64650 |
| H | -4.72178 | -1.70772 | -1.32872 |
| C | -3.18793 | 1.40466  | -1.87775 |
| H | -3.62440 | 1.59721  | -2.87445 |
| H | -3.77961 | 1.97589  | -1.14442 |
| H | -2.15696 | 1.79507  | -1.87684 |
| C | -0.01533 | 1.88808  | 0.06768  |
| H | 0.02882  | 2.17273  | 1.21459  |
| C | -0.02879 | 3.16262  | 0.02786  |
| C | -0.04652 | 4.63499  | -0.00994 |
| C | -0.13340 | 5.00922  | -1.52411 |
| C | 1.25641  | 5.21745  | 0.60029  |
| H | 1.34951  | 4.95439  | 1.66700  |
| H | 2.14719  | 4.84683  | 0.06837  |
| H | 1.23799  | 6.31732  | 0.52217  |
| H | 0.73694  | 4.63204  | -2.08434 |
| H | -0.14831 | 6.10907  | -1.60553 |
| H | -1.05272 | 4.61498  | -1.98554 |
| C | -1.28929 | 5.18762  | 0.73846  |
| H | -1.25866 | 4.92579  | 1.80923  |
| H | -1.30613 | 6.28742  | 0.65885  |
| H | -2.22322 | 4.79416  | 0.30640  |

**TS (C-E)<sub>o-tBu</sub>**

SCF (BP86) Energy = -1387.28865618  
 Enthalpy 0K = -1386.598844  
 Enthalpy 298K = -1386.553762  
 Free Energy 298K = -1386.675244  
 Lowest Frequency = -628.8056 cm<sup>-1</sup>  
 Second Frequency = 5.9072 cm<sup>-1</sup>

SCF (BP86-D3BJ) Energy = -  
 1387.498408  
 SCF (FB) Energy = -1387.329755  
 SCF (DFB) Energy = -1387.335665  
 SCF (BS2) Energy = -2056.91727

|    |          |          |          |
|----|----------|----------|----------|
| Rh | 0.00016  | -0.09021 | -0.00391 |
| P  | -2.29534 | -0.42468 | -0.02704 |
| P  | 2.29569  | -0.42427 | -0.02716 |
| N  | 0.00029  | -2.18115 | 0.04911  |
| C  | -1.17999 | -2.87807 | 0.07563  |
| C  | -1.21760 | -4.27818 | 0.12923  |
| H  | -2.18176 | -4.78816 | 0.14693  |
| C  | 0.00055  | -4.96925 | 0.15576  |
| H  | 0.00065  | -6.06235 | 0.19701  |
| C  | 1.21857  | -4.27797 | 0.12865  |
| H  | 2.18282  | -4.78780 | 0.14592  |
| C  | 1.18072  | -2.87786 | 0.07509  |
| O  | -2.34344 | -2.19102 | 0.04706  |
| O  | 2.34404  | -2.19064 | 0.04603  |
| C  | -3.26802 | -0.14048 | -1.65078 |
| C  | -2.48912 | -0.91415 | -2.74132 |
| H  | -2.52381 | -2.00343 | -2.57923 |
| H  | -2.95709 | -0.70401 | -3.71945 |
| H  | -1.43339 | -0.59847 | -2.79669 |
| C  | -4.72157 | -0.64980 | -1.58504 |
| H  | -5.34698 | -0.03768 | -0.91648 |
| H  | -5.16300 | -0.58140 | -2.59555 |
| H  | -4.78156 | -1.70278 | -1.26621 |
| C  | -3.22634 | 1.37388  | -1.96038 |
| H  | -2.19872 | 1.77360  | -1.96296 |
| H  | -3.65559 | 1.53600  | -2.96521 |
| H  | -3.82256 | 1.96579  | -1.24862 |
| C  | -3.23750 | -0.02782 | 1.59258  |
| C  | -2.20926 | -0.30251 | 2.71768  |
| H  | -1.30799 | 0.32568  | 2.60980  |
| H  | -2.67442 | -0.06179 | 3.69060  |
| H  | -1.90572 | -1.36281 | 2.75186  |
| C  | -3.59535 | 1.47495  | 1.57255  |
| H  | -4.40625 | 1.69890  | 0.86060  |
| H  | -3.95271 | 1.76562  | 2.57672  |
| H  | -2.72221 | 2.10617  | 1.33169  |
| C  | -4.48681 | -0.90468 | 1.81303  |
| H  | -4.24888 | -1.97896 | 1.76737  |
| H  | -4.88570 | -0.69103 | 2.82111  |
| H  | -5.28909 | -0.69287 | 1.09168  |
| C  | 3.26839  | -0.13890 | -1.65072 |
| C  | 2.49087  | -0.91366 | -2.74146 |
| H  | 1.43469  | -0.59949 | -2.79702 |
| H  | 2.95871  | -0.70268 | -3.71948 |
| H  | 2.52714  | -2.00290 | -2.57950 |
| C  | 3.22470  | 1.37540  | -1.96036 |
| H  | 3.81759  | 1.96892  | -1.24725 |
| H  | 3.65594  | 1.53808  | -2.96426 |
| H  | 2.19615  | 1.77276  | -1.96522 |
| C  | 4.72265  | -0.64611 | -1.58451 |
| H  | 4.78410  | -1.69900 | -1.26562 |
| H  | 5.16423  | -0.57714 | -2.59492 |
| H  | 5.34698  | -0.03302 | -0.91584 |
| C  | 3.23762  | -0.02818 | 1.59282  |
| C  | 2.20938  | -0.30401 | 2.71765  |
| H  | 1.90624  | -1.36443 | 2.75116  |
| H  | 2.67437  | -0.06373 | 3.69076  |
| H  | 1.30786  | 0.32390  | 2.61005  |

|   |          |          |          |
|---|----------|----------|----------|
| C | 4.48714  | -0.90489 | 1.81266  |
| H | 5.28938  | -0.69232 | 1.09150  |
| H | 4.88594  | -0.69185 | 2.82091  |
| H | 4.24949  | -1.97920 | 1.76622  |
| C | 3.59502  | 1.47470  | 1.57395  |
| H | 3.95258  | 1.76466  | 2.57826  |
| H | 4.40562  | 1.69945  | 0.86192  |
| H | 2.72166  | 2.10588  | 1.33377  |
| C | 0.00092  | 1.88187  | 0.03925  |
| H | 0.00038  | 0.85786  | -1.24304 |
| C | 0.00336  | 3.12441  | -0.02113 |
| C | 0.00137  | 4.60136  | 0.01776  |
| C | -0.27698 | 5.06756  | 1.47495  |
| C | -1.11126 | 5.14585  | -0.91984 |
| H | -0.94099 | 4.83167  | -1.96299 |
| H | -2.10549 | 4.78746  | -0.60608 |
| H | -1.11765 | 6.24904  | -0.89070 |
| H | -1.25694 | 4.70624  | 1.82762  |
| H | -0.27970 | 6.17042  | 1.51662  |
| H | 0.49829  | 4.69721  | 2.16555  |
| C | 1.37978  | 5.14644  | -0.44442 |
| H | 1.60490  | 4.83301  | -1.47729 |
| H | 1.37696  | 6.24963  | -0.41397 |
| H | 2.18890  | 4.78709  | 0.21274  |

**E<sub>0</sub>-tBu**

SCF (BP86) Energy = -1387.29489217  
 Enthalpy 0K = -1386.603342  
 Enthalpy 298K = -1386.559120  
 Free Energy 298K = -1386.676023  
 Lowest Frequency = -4.2366 cm<sup>-1</sup>  
 Second Frequency = 21.3155 cm<sup>-1</sup>  
 SCF (BP86-D3BJ) Energy = -  
 1387.505307  
 SCF (FB) Energy = -1387.337383  
 SCF (DFB) Energy = -1387.343817  
 SCF (BS2) Energy = -2056.922463

|    |          |          |          |
|----|----------|----------|----------|
| Rh | -0.00045 | -0.09834 | 0.02127  |
| P  | 2.29497  | -0.43061 | 0.03626  |
| P  | -2.29612 | -0.42767 | 0.03653  |
| N  | -0.00174 | -2.19526 | -0.08376 |
| C  | 1.17757  | -2.88729 | -0.10822 |
| C  | 1.21585  | -4.28732 | -0.16798 |
| H  | 2.17929  | -4.79867 | -0.18817 |
| C  | -0.00353 | -4.97709 | -0.19733 |
| H  | -0.00424 | -6.06998 | -0.24312 |
| C  | -1.22202 | -4.28580 | -0.16680 |
| H  | -2.18612 | -4.79595 | -0.18607 |
| C  | -1.18195 | -2.88582 | -0.10713 |
| O  | 2.34107  | -2.19427 | -0.07987 |
| O  | -2.34456 | -2.19135 | -0.07785 |
| C  | 3.29632  | -0.16493 | 1.64423  |
| C  | 2.60726  | -1.02078 | 2.73253  |
| H  | 2.67317  | -2.09919 | 2.51753  |
| H  | 3.11795  | -0.83555 | 3.69401  |
| H  | 1.54602  | -0.74946 | 2.86567  |
| C  | 4.77289  | -0.58990 | 1.51024  |
| H  | 5.33505  | 0.06584  | 0.82690  |
| H  | 5.25117  | -0.51008 | 2.50285  |
| H  | 4.87878  | -1.63369 | 1.17314  |
| C  | 3.17809  | 1.33384  | 2.00829  |
| H  | 2.12957  | 1.67306  | 2.04170  |
| H  | 3.62197  | 1.48520  | 3.00845  |

|   |          |          |          |
|---|----------|----------|----------|
| H | 3.72410  | 1.98098  | 1.30430  |
| C | 3.19919  | 0.01963  | -1.58990 |
| C | 2.13163  | -0.18502 | -2.69326 |
| H | 1.25609  | 0.47133  | -2.53962 |
| H | 2.57294  | 0.07862  | -3.67138 |
| H | 1.79310  | -1.23329 | -2.75747 |
| C | 3.58673  | 1.51331  | -1.51690 |
| H | 4.41560  | 1.69311  | -0.81338 |
| H | 3.92982  | 1.83703  | -2.51595 |
| H | 2.73028  | 2.14984  | -1.23303 |
| C | 4.42123  | -0.87373 | -1.88335 |
| H | 4.15811  | -1.94308 | -1.88517 |
| H | 4.80267  | -0.61863 | -2.88856 |
| H | 5.24393  | -0.71749 | -1.17100 |
| C | -3.29716 | -0.15859 | 1.64415  |
| C | -2.61124 | -1.01649 | 2.73281  |
| H | -1.54893 | -0.74920 | 2.86564  |
| H | -3.12104 | -0.82871 | 3.69426  |
| H | -2.68135 | -2.09475 | 2.51838  |
| C | -3.17392 | 1.33987  | 2.00780  |
| H | -3.71450 | 1.98938  | 1.30185  |
| H | -3.62022 | 1.49331  | 3.00658  |
| H | -2.12392 | 1.67424  | 2.04413  |
| C | -4.77512 | -0.57851 | 1.50987  |
| H | -4.88456 | -1.62196 | 1.17287  |
| H | -5.25327 | -0.49698 | 2.50241  |
| H | -5.33490 | 0.07915  | 0.82641  |
| C | -3.19914 | 0.02192  | -1.59054 |
| C | -2.13243 | -0.18870 | -2.69360 |
| H | -1.79764 | -1.23827 | -2.75589 |
| H | -2.57292 | 0.07469  | -3.67216 |
| H | -1.25446 | 0.46476  | -2.54140 |
| C | -4.42406 | -0.86818 | -1.88184 |
| H | -5.24647 | -0.70711 | -1.17024 |
| H | -4.80432 | -0.61466 | -2.88790 |
| H | -4.16452 | -1.93842 | -1.88058 |
| C | -3.58169 | 1.51699  | -1.52067 |
| H | -3.92446 | 1.83963  | -2.52018 |
| H | -4.40938 | 1.70110  | -0.81687 |
| H | -2.72292 | 2.15126  | -1.23871 |
| C | 0.00004  | 1.86675  | 0.03877  |
| H | -0.00030 | -0.05416 | 1.53655  |
| C | -0.00121 | 3.10905  | 0.04208  |
| C | 0.00221  | 4.58752  | -0.00033 |
| C | 0.25356  | 5.05659  | -1.46052 |
| C | 1.13119  | 5.13253  | 0.91687  |
| H | 0.98070  | 4.81504  | 1.96201  |
| H | 2.11951  | 4.77433  | 0.58422  |
| H | 1.13800  | 6.23602  | 0.89026  |
| H | 1.22622  | 4.69401  | -1.83230 |
| H | 0.25735  | 6.15954  | -1.50343 |
| H | -0.53480 | 4.68765  | -2.13731 |
| C | -1.36604 | 5.13578  | 0.48759  |
| H | -1.57306 | 4.81928  | 1.52330  |
| H | -1.36295 | 6.23926  | 0.45978  |
| H | -2.18783 | 4.77919  | -0.15557 |

#### 10<sub>o</sub>-tBu

SCF (BP86) Energy = -1387.31173059  
 Enthalpy 0K = -1386.618202  
 Enthalpy 298K = -1386.573141  
 Free Energy 298K = -1386.693896  
 Lowest Frequency = 12.5499 cm<sup>-1</sup>  
 Second Frequency = 21.5117 cm<sup>-1</sup>

SCF (BP86-D3BJ) Energy = -  
 1387.522322  
 SCF (FB) Energy = -1387.35165  
 SCF (DFB) Energy = -1387.357062  
 SCF (BS2) Energy = -2056.937959

|    |          |          |          |
|----|----------|----------|----------|
| Rh | -0.01781 | -0.02705 | 0.05775  |
| P  | 2.27166  | -0.45351 | 0.03231  |
| P  | -2.32391 | -0.29120 | 0.04299  |
| N  | -0.09254 | -2.12213 | -0.15412 |
| C  | 1.06183  | -2.85268 | -0.25620 |
| C  | 1.05044  | -4.24836 | -0.39365 |
| H  | 1.99509  | -4.78813 | -0.47205 |
| C  | -0.19143 | -4.89532 | -0.42229 |
| H  | -0.23024 | -5.98351 | -0.52850 |
| C  | -1.38442 | -4.16928 | -0.31410 |
| H  | -2.36520 | -4.64642 | -0.33008 |
| C  | -1.29600 | -2.77653 | -0.17772 |
| O  | 2.24601  | -2.20810 | -0.22905 |
| O  | -2.43132 | -2.05755 | -0.05789 |
| C  | 3.20004  | -0.41005 | 1.71023  |
| C  | 2.31346  | -1.22426 | 2.68283  |
| H  | 2.28536  | -2.29398 | 2.41943  |
| H  | 2.73757  | -1.14044 | 3.69943  |
| H  | 1.27914  | -0.83871 | 2.71190  |
| C  | 4.61420  | -1.01848 | 1.65221  |
| H  | 5.31249  | -0.39604 | 1.07044  |
| H  | 5.01404  | -1.07943 | 2.68062  |
| H  | 4.61252  | -2.03816 | 1.23480  |
| C  | 3.24963  | 1.06303  | 2.17760  |
| H  | 2.24876  | 1.52466  | 2.19377  |
| H  | 3.65380  | 1.09031  | 3.20550  |
| H  | 3.90781  | 1.68438  | 1.55040  |
| C  | 3.33351  | 0.02467  | -1.49289 |
| C  | 2.34449  | 0.01163  | -2.68365 |
| H  | 1.50037  | 0.70420  | -2.52581 |
| H  | 2.88255  | 0.32213  | -3.59752 |
| H  | 1.93744  | -0.99743 | -2.86617 |
| C  | 3.87483  | 1.45470  | -1.27516 |
| H  | 4.67159  | 1.48670  | -0.51465 |
| H  | 4.31164  | 1.81710  | -2.22288 |
| H  | 3.08201  | 2.16533  | -0.98408 |
| C  | 4.48582  | -0.96226 | -1.77399 |
| H  | 4.12185  | -1.99381 | -1.89621 |
| H  | 4.97431  | -0.66259 | -2.71874 |
| H  | 5.25551  | -0.95446 | -0.98884 |
| C  | -3.32838 | -0.04344 | 1.65726  |
| C  | -2.35467 | -0.43017 | 2.79672  |
| H  | -1.43426 | 0.17733  | 2.77669  |
| H  | -2.85957 | -0.26480 | 3.76558  |
| H  | -2.06938 | -1.49464 | 2.74879  |
| C  | -3.69411 | 1.45409  | 1.76631  |
| H  | -4.47885 | 1.74293  | 1.04849  |
| H  | -4.09063 | 1.64831  | 2.77899  |
| H  | -2.82070 | 2.11247  | 1.61864  |
| C  | -4.58795 | -0.93029 | 1.74019  |
| H  | -4.34885 | -1.99678 | 1.60790  |
| H  | -5.03240 | -0.80689 | 2.74424  |
| H  | -5.35576 | -0.65006 | 1.00497  |
| C  | -3.24937 | 0.15695  | -1.57575 |
| C  | -2.41766 | -0.49777 | -2.70516 |
| H  | -2.46139 | -1.59822 | -2.66607 |
| H  | -2.83327 | -0.18029 | -3.67821 |
| H  | -1.35967 | -0.18261 | -2.66807 |



|   |          |          |          |
|---|----------|----------|----------|
| C | -4.70182 | -0.35406 | -1.62702 |
| H | -5.35952 | 0.18955  | -0.93056 |
| H | -5.09833 | -0.18673 | -2.64486 |
| H | -4.77212 | -1.43304 | -1.41562 |
| C | -3.19778 | 1.69374  | -1.73165 |
| H | -3.59922 | 1.96033  | -2.72578 |
| H | -3.80756 | 2.21769  | -0.97916 |
| H | -2.16495 | 2.07445  | -1.67000 |
| C | 0.02140  | 1.79668  | 0.39736  |
| H | -0.15272 | 3.22548  | 1.84304  |
| C | 0.02085  | 3.06401  | 0.76341  |
| C | 0.23233  | 4.34936  | -0.06318 |
| C | 0.42427  | 4.03357  | -1.56043 |
| C | 1.48449  | 5.07555  | 0.48669  |
| H | 1.37566  | 5.31112  | 1.55922  |
| H | 2.39154  | 4.46042  | 0.36205  |
| H | 1.63892  | 6.02605  | -0.05344 |
| H | 1.30215  | 3.38721  | -1.72917 |
| H | 0.58057  | 4.96762  | -2.12610 |
| H | -0.46028 | 3.52817  | -1.98350 |
| C | -1.01236 | 5.25071  | 0.12624  |
| H | -1.17500 | 5.49481  | 1.19013  |
| H | -0.87849 | 6.20053  | -0.42050 |
| H | -1.92311 | 4.76143  | -0.25782 |

**TS (B-10) 'o-tBu**

SCF (BP86) Energy = -1387.20741801  
 Enthalpy 0K = -1386.517314  
 Enthalpy 298K = -1386.472305  
 Free Energy 298K = -1386.590702  
 Lowest Frequency = -164.5946 cm<sup>-1</sup>  
 Second Frequency = 19.6956 cm<sup>-1</sup>  
 SCF (BP86-D3BJ) Energy = -  
 1387.424559  
 SCF (FB) Energy = -1387.248829  
 SCF (DFB) Energy = -1387.254707  
 SCF (BS2) Energy = -2056.836092

|    |          |          |          |
|----|----------|----------|----------|
| Rh | 0.10962  | 0.06024  | -0.12832 |
| P  | 2.44696  | 0.11162  | -0.07447 |
| P  | -2.12808 | -0.44319 | -0.11213 |
| N  | 0.46497  | -1.92281 | 0.31494  |
| C  | 1.73192  | -2.41617 | 0.48009  |
| C  | 1.98784  | -3.75694 | 0.78023  |
| H  | 3.01780  | -4.09474 | 0.90144  |
| C  | 0.88620  | -4.61738 | 0.91136  |
| H  | 1.05164  | -5.67373 | 1.14392  |
| C  | -0.41526 | -4.14306 | 0.74384  |
| H  | -1.28793 | -4.79125 | 0.83531  |
| C  | -0.61621 | -2.77863 | 0.43390  |
| O  | 2.78067  | -1.56446 | 0.34872  |
| O  | -1.84182 | -2.32070 | 0.25778  |
| C  | 3.31856  | 0.93769  | 1.42624  |
| C  | 2.34286  | 0.72441  | 2.60889  |
| H  | 2.24069  | -0.34336 | 2.86427  |
| H  | 2.73786  | 1.24567  | 3.49983  |
| H  | 1.33533  | 1.11876  | 2.38763  |
| C  | 4.68256  | 0.30896  | 1.77968  |
| H  | 5.45732  | 0.52146  | 1.02928  |
| H  | 5.02628  | 0.73716  | 2.73878  |
| H  | 4.60758  | -0.78194 | 1.90700  |
| C  | 3.46898  | 2.44587  | 1.13519  |
| H  | 2.51129  | 2.90717  | 0.83511  |
| H  | 3.80975  | 2.95834  | 2.05275  |

|   |          |          |          |
|---|----------|----------|----------|
| H | 4.21661  | 2.64832  | 0.35095  |
| C | 3.43290  | 0.19412  | -1.72074 |
| C | 2.80566  | -0.90185 | -2.61560 |
| H | 1.71069  | -0.78474 | -2.69844 |
| H | 3.23541  | -0.82031 | -3.63015 |
| H | 3.02291  | -1.91336 | -2.23743 |
| C | 3.17700  | 1.57700  | -2.36077 |
| H | 3.57030  | 2.40976  | -1.75534 |
| H | 3.68632  | 1.61455  | -3.34040 |
| H | 2.10253  | 1.74540  | -2.54110 |
| C | 4.94430  | -0.06036 | -1.56238 |
| H | 5.15311  | -0.99019 | -1.00986 |
| H | 5.39396  | -0.16102 | -2.56688 |
| H | 5.45786  | 0.77517  | -1.06034 |
| C | -3.25697 | -0.25988 | 1.45184  |
| C | -2.31108 | -0.38904 | 2.66860  |
| H | -1.51198 | 0.37140  | 2.65092  |
| H | -2.89890 | -0.25014 | 3.59404  |
| H | -1.84024 | -1.38334 | 2.71517  |
| C | -3.97080 | 1.10296  | 1.49339  |
| H | -4.63686 | 1.26015  | 0.63149  |
| H | -4.58870 | 1.14764  | 2.40851  |
| H | -3.25214 | 1.93177  | 1.52918  |
| C | -4.32190 | -1.37921 | 1.50029  |
| H | -3.87948 | -2.38210 | 1.42402  |
| H | -4.84508 | -1.30790 | 2.47087  |
| H | -5.08467 | -1.26075 | 0.71384  |
| C | -3.09097 | -0.76601 | -1.78441 |
| C | -2.06645 | -0.62353 | -2.93216 |
| H | -1.21928 | -1.31934 | -2.81383 |
| H | -2.57344 | -0.86673 | -3.88347 |
| H | -1.66830 | 0.39939  | -3.01425 |
| C | -3.68581 | -2.19235 | -1.83430 |
| H | -4.39585 | -2.39309 | -1.01936 |
| H | -4.23786 | -2.28630 | -2.78694 |
| H | -2.90865 | -2.96852 | -1.81082 |
| C | -4.22733 | 0.26542  | -1.95941 |
| H | -4.68138 | 0.11744  | -2.95597 |
| H | -5.03089 | 0.12929  | -1.21706 |
| H | -3.86251 | 1.30217  | -1.90115 |
| C | -0.36973 | 1.79012  | -1.02947 |
| H | 0.11070  | 2.52880  | -1.66310 |
| C | -1.55557 | 1.46019  | -0.54948 |
| C | -1.28821 | 3.89944  | 0.29027  |
| C | -0.20394 | 4.66340  | -0.42363 |
| C | -1.01714 | 3.60109  | 1.73187  |
| H | -1.81970 | 3.03214  | 2.22057  |
| H | -0.06029 | 3.06999  | 1.86494  |
| H | -0.92143 | 4.56843  | 2.27254  |
| H | 0.80839  | 4.29103  | -0.20130 |
| H | -0.24521 | 5.71036  | -0.05147 |
| H | -0.35814 | 4.71739  | -1.51325 |
| C | -2.68260 | 4.20413  | -0.16432 |
| H | -2.78997 | 4.10613  | -1.25685 |
| H | -3.44871 | 3.59749  | 0.33516  |
| H | -2.89106 | 5.27113  | 0.07418  |

**TS (B-10) "o-tBu**

SCF (BP86) Energy = -1387.22870948  
 Enthalpy 0K = -1386.536772  
 Enthalpy 298K = -1386.492190  
 Free Energy 298K = -1386.608164  
 Lowest Frequency = -384.4696 cm<sup>-1</sup>  
 Second Frequency = 17.4560 cm<sup>-1</sup>

SCF (BP86-D3BJ) Energy = -  
 1387.446754  
 SCF (FB) Energy = -1387.269765  
 SCF (DFB) Energy = -1387.27551  
 SCF (BS2) Energy = -2056.855701

|    |          |          |          |
|----|----------|----------|----------|
| Rh | 0.00002  | 0.13682  | -0.08958 |
| P  | 2.29605  | -0.24113 | 0.01122  |
| P  | -2.29599 | -0.24121 | 0.01120  |
| N  | 0.00006  | -1.96109 | -0.11197 |
| C  | 1.16989  | -2.67117 | -0.17955 |
| C  | 1.21204  | -4.06944 | -0.27971 |
| H  | 2.18101  | -4.56851 | -0.32514 |
| C  | 0.00011  | -4.76663 | -0.32809 |
| H  | 0.00013  | -5.85729 | -0.40983 |
| C  | -1.21183 | -4.06949 | -0.27972 |
| H  | -2.18079 | -4.56859 | -0.32515 |
| C  | -1.16974 | -2.67121 | -0.17958 |
| O  | 2.33497  | -1.99649 | -0.15532 |
| O  | -2.33484 | -1.99657 | -0.15537 |
| C  | 3.23174  | -0.14740 | 1.71370  |
| C  | 2.12386  | -0.19556 | 2.79181  |
| H  | 1.54784  | -1.13488 | 2.74392  |
| H  | 2.59063  | -0.13867 | 3.79224  |
| H  | 1.40965  | 0.63915  | 2.69416  |
| C  | 4.18288  | -1.34755 | 1.92016  |
| H  | 4.99471  | -1.38258 | 1.17907  |
| H  | 4.64796  | -1.24504 | 2.91762  |
| H  | 3.65000  | -2.30914 | 1.89326  |
| C  | 4.03247  | 1.16665  | 1.83503  |
| H  | 3.42108  | 2.06308  | 1.65141  |
| H  | 4.42431  | 1.24458  | 2.86534  |
| H  | 4.90027  | 1.18904  | 1.15654  |
| C  | 3.43615  | 0.14243  | -1.48880 |
| C  | 2.65517  | -0.37024 | -2.72271 |
| H  | 1.64356  | 0.06797  | -2.77759 |
| H  | 3.20667  | -0.08540 | -3.63700 |
| H  | 2.55712  | -1.46761 | -2.71728 |
| C  | 3.61767  | 1.67273  | -1.59998 |
| H  | 4.19132  | 2.09477  | -0.75989 |
| H  | 4.18201  | 1.89408  | -2.52410 |
| H  | 2.64887  | 2.19373  | -1.66712 |
| C  | 4.80499  | -0.56301 | -1.41115 |
| H  | 4.70160  | -1.64974 | -1.26471 |
| H  | 5.33924  | -0.40352 | -2.36551 |
| H  | 5.44343  | -0.15531 | -0.61102 |
| C  | -3.23175 | -0.14753 | 1.71367  |
| C  | -2.12390 | -0.19535 | 2.79183  |
| H  | -1.40994 | 0.63958  | 2.69422  |
| H  | -2.59072 | -0.13860 | 3.79224  |
| H  | -1.54758 | -1.13449 | 2.74397  |
| C  | -4.03278 | 1.16635  | 1.83488  |
| H  | -4.90052 | 1.18854  | 1.15630  |
| H  | -4.42476 | 1.24421  | 2.86515  |
| H  | -3.42156 | 2.06290  | 1.65132  |
| C  | -4.18262 | -1.34788 | 1.92019  |
| H  | -3.64955 | -2.30936 | 1.89328  |
| H  | -4.64768 | -1.24545 | 2.91767  |
| H  | -4.99448 | -1.38309 | 1.17914  |
| C  | -3.43612 | 0.14229  | -1.48881 |
| C  | -2.65517 | -0.37045 | -2.72272 |
| H  | -2.55727 | -1.46783 | -2.71733 |
| H  | -3.20660 | -0.08551 | -3.63702 |
| H  | -1.64349 | 0.06762  | -2.77757 |

|   |          |          |          |
|---|----------|----------|----------|
| C | -4.80496 | -0.56313 | -1.41110 |
| H | -5.44336 | -0.15544 | -0.61094 |
| H | -5.33925 | -0.40363 | -2.36543 |
| H | -4.70156 | -1.64987 | -1.26469 |
| C | -3.61761 | 1.67258  | -1.60006 |
| H | -4.18220 | 1.89389  | -2.52404 |
| H | -4.19104 | 2.09470  | -0.75985 |
| H | -2.64882 | 2.19355  | -1.66749 |
| C | 0.00000  | 2.05306  | -0.67237 |
| C | 0.00008  | 2.71659  | -1.75455 |
| H | 0.00025  | 3.30282  | -2.65947 |
| C | -0.00017 | 3.65631  | 0.19616  |
| C | -1.27335 | 3.57398  | 1.03435  |
| H | -1.32303 | 4.47304  | 1.67794  |
| H | -2.17507 | 3.56536  | 0.40257  |
| H | -1.26719 | 2.68010  | 1.67446  |
| C | -0.00026 | 4.98469  | -0.60661 |
| H | -0.90022 | 5.10759  | -1.23043 |
| H | -0.00040 | 5.80764  | 0.13098  |
| H | 0.89975  | 5.10780  | -1.23030 |
| C | 1.27293  | 3.57419  | 1.03449  |
| H | 2.17473  | 3.56561  | 0.40280  |
| H | 1.32246  | 4.47330  | 1.67802  |
| H | 1.26681  | 2.68035  | 1.67466  |

**TS (B-F) o-tBu**

SCF (BP86) Energy = -1387.20634180  
 Enthalpy 0K = -1386.514360  
 Enthalpy 298K = -1386.469775  
 Free Energy 298K = -1386.585035  
 Lowest Frequency = -263.8705 cm<sup>-1</sup>  
 Second Frequency = 14.1794 cm<sup>-1</sup>  
 SCF (BP86-D3BJ) Energy = -  
 1387.432793  
 SCF (FB) Energy = -1387.246558  
 SCF (DFB) Energy = -1387.252043  
 SCF (BS2) Energy = -2056.834875

|    |          |          |          |
|----|----------|----------|----------|
| Rh | 0.02204  | -0.32970 | -0.06580 |
| P  | 2.35051  | 0.10112  | 0.04303  |
| P  | -2.34739 | 0.08788  | 0.00562  |
| N  | 0.01544  | 1.77148  | -0.29150 |
| C  | 1.17022  | 2.50459  | -0.18529 |
| C  | 1.20115  | 3.90321  | -0.28742 |
| H  | 2.15997  | 4.41750  | -0.20930 |
| C  | -0.00742 | 4.58142  | -0.47277 |
| H  | -0.01528 | 5.67209  | -0.55450 |
| C  | -1.20860 | 3.86728  | -0.53009 |
| H  | -2.17900 | 4.35307  | -0.64052 |
| C  | -1.15716 | 2.47044  | -0.41773 |
| O  | 2.32787  | 1.86134  | 0.03634  |
| O  | -2.31603 | 1.79217  | -0.43697 |
| C  | 3.49729  | -0.04312 | -1.52731 |
| C  | 2.61235  | 0.41339  | -2.71426 |
| H  | 2.38474  | 1.49042  | -2.65348 |
| H  | 3.16977  | 0.24840  | -3.65381 |
| H  | 1.66012  | -0.13389 | -2.78491 |
| C  | 4.72461  | 0.89468  | -1.46501 |
| H  | 5.50320  | 0.53139  | -0.78020 |
| H  | 5.17101  | 0.93032  | -2.47550 |
| H  | 4.45453  | 1.92345  | -1.18400 |
| C  | 3.98110  | -1.49535 | -1.72013 |
| H  | 3.16122  | -2.22627 | -1.79069 |
| H  | 4.55121  | -1.55410 | -2.66483 |

|   |          |          |          |    |          |          |          |
|---|----------|----------|----------|----|----------|----------|----------|
| H | 4.65922  | -1.81543 | -0.91249 | Rh | -0.06452 | -0.55796 | 0.01497  |
| C | 3.28264  | -0.11597 | 1.71773  | P  | -2.36827 | 0.01344  | 0.09712  |
| C | 2.31373  | 0.42392  | 2.79635  | P  | 2.36065  | -0.04429 | 0.20167  |
| H | 1.35070  | -0.10910 | 2.78654  | N  | -0.02653 | 1.52208  | -0.57331 |
| H | 2.78108  | 0.27051  | 3.78598  | C  | -1.17898 | 2.15985  | -0.94057 |
| H | 2.13386  | 1.50515  | 2.67829  | C  | -1.21958 | 3.52266  | -1.26270 |
| C | 3.54666  | -1.62028 | 1.94843  | H  | -2.15997 | 3.97318  | -1.58377 |
| H | 4.24932  | -2.04269 | 1.21131  | C  | -0.04254 | 4.26691  | -1.09928 |
| H | 4.01288  | -1.74138 | 2.94312  | H  | -0.03979 | 5.33601  | -1.33085 |
| H | 2.61418  | -2.20558 | 1.94338  | C  | 1.11454  | 3.66307  | -0.59209 |
| C | 4.60542  | 0.67575  | 1.78690  | H  | 2.02825  | 4.22451  | -0.39124 |
| H | 4.48792  | 1.72704  | 1.48164  | C  | 1.07466  | 2.28706  | -0.31270 |
| H | 4.94778  | 0.67026  | 2.83739  | O  | -2.32427 | 1.43630  | -0.95355 |
| H | 5.40310  | 0.21437  | 1.18616  | O  | 2.14700  | 1.71167  | 0.27257  |
| C | -3.73797 | -0.36141 | -1.30509 | C  | -2.67802 | 0.79409  | 1.85455  |
| C | -3.02116 | -0.75619 | -2.61481 | C  | -1.29968 | 1.22713  | 2.40337  |
| H | -2.51135 | -1.72784 | -2.53740 | H  | -0.89230 | 2.10682  | 1.88050  |
| H | -3.77514 | -0.84557 | -3.41745 | H  | -1.41483 | 1.50111  | 3.46814  |
| H | -2.28938 | 0.00526  | -2.93589 | H  | -0.56461 | 0.40565  | 2.35796  |
| C | -4.62091 | -1.53071 | -0.81610 | C  | -3.59594 | 2.03451  | 1.84838  |
| H | -5.28296 | -1.23439 | 0.01226  | H  | -4.64880 | 1.80397  | 1.64539  |
| H | -5.26899 | -1.84656 | -1.65334 | H  | -3.54865 | 2.49286  | 2.85305  |
| H | -4.04817 | -2.41698 | -0.49992 | H  | -3.25912 | 2.79449  | 1.12497  |
| C | -4.63930 | 0.86180  | -1.60350 | C  | -3.23049 | -0.33280 | 2.75820  |
| H | -4.08176 | 1.68164  | -2.07802 | H  | -2.59411 | -1.23504 | 2.73068  |
| H | -5.42008 | 0.52827  | -2.31104 | H  | -3.24253 | 0.03226  | 3.80110  |
| H | -5.14715 | 1.25734  | -0.71344 | H  | -4.26365 | -0.61302 | 2.50156  |
| C | -3.09659 | 0.25086  | 1.77948  | C  | -4.02939 | -0.70455 | -0.62853 |
| C | -2.02230 | 0.97876  | 2.62114  | C  | -3.92970 | -0.71333 | -2.17360 |
| H | -1.85645 | 2.01340  | 2.27694  | H  | -3.10126 | -1.31808 | -2.56572 |
| H | -2.37799 | 1.03342  | 3.66603  | H  | -4.86465 | -1.15018 | -2.56732 |
| H | -1.06208 | 0.43885  | 2.61216  | H  | -3.83713 | 0.30637  | -2.57748 |
| C | -4.40396 | 1.06827  | 1.80959  | C  | -4.24824 | -2.12841 | -0.06215 |
| H | -5.24335 | 0.54629  | 1.32438  | H  | -4.50317 | -2.11121 | 1.00813  |
| H | -4.68833 | 1.22300  | 2.86622  | H  | -5.10141 | -2.58485 | -0.59487 |
| H | -4.28573 | 2.06193  | 1.34869  | H  | -3.38077 | -2.79172 | -0.18732 |
| C | -3.32462 | -1.16665 | 2.35274  | C  | -5.24150 | 0.18115  | -0.26134 |
| H | -3.62390 | -1.06511 | 3.41187  | H  | -5.10979 | 1.22901  | -0.57296 |
| H | -4.13234 | -1.70777 | 1.83767  | H  | -6.11820 | -0.21711 | -0.80355 |
| H | -2.40516 | -1.77236 | 2.32143  | H  | -5.48627 | 0.14576  | 0.81026  |
| C | 0.02772  | -1.84069 | 1.18714  | C  | 3.08966  | -0.41068 | 1.94997  |
| C | 0.01987  | -2.44581 | 2.27390  | C  | 2.01667  | -0.01270 | 2.98610  |
| H | 0.02097  | -2.95252 | 3.22223  | H  | 1.10498  | -0.61882 | 2.86938  |
| C | 0.03503  | -2.87583 | -0.62366 | H  | 2.42013  | -0.21662 | 3.99452  |
| C | 0.21967  | -2.38632 | -2.06678 | H  | 1.76786  | 1.06036  | 2.93904  |
| H | 1.24728  | -2.06230 | -2.27114 | C  | 3.29021  | -1.94646 | 2.00209  |
| H | 0.02446  | -3.25953 | -2.72714 | H  | 4.07767  | -2.29930 | 1.31893  |
| H | -0.47298 | -1.58966 | -2.37381 | H  | 3.60382  | -2.21475 | 3.02725  |
| C | -1.31426 | -3.56703 | -0.45144 | H  | 2.35227  | -2.48711 | 1.79119  |
| H | -1.34827 | -4.41612 | -1.16296 | C  | 4.40154  | 0.32536  | 2.28667  |
| H | -1.45369 | -3.95666 | 0.56537  | H  | 4.30552  | 1.41929  | 2.19588  |
| H | -2.15258 | -2.90236 | -0.69944 | H  | 4.65252  | 0.10228  | 3.33941  |
| C | 1.19475  | -3.79791 | -0.24518 | H  | 5.25263  | -0.01556 | 1.67804  |
| H | 1.00419  | -4.33114 | 0.69595  | C  | 3.83721  | 0.06188  | -1.12645 |
| H | 1.30995  | -4.54002 | -1.06082 | C  | 3.22303  | 0.25600  | -2.53125 |
| H | 2.15001  | -3.26156 | -0.15304 | H  | 2.52498  | 1.10992  | -2.56714 |
|   |          |          |          | H  | 4.04378  | 0.48485  | -3.23471 |
|   |          |          |          | H  | 2.71184  | -0.63722 | -2.91462 |
|   |          |          |          | C  | 4.72046  | 1.30571  | -0.85588 |
|   |          |          |          | H  | 5.20420  | 1.30317  | 0.12768  |
|   |          |          |          | H  | 5.52210  | 1.30441  | -1.61673 |
|   |          |          |          | H  | 4.15859  | 2.24420  | -0.96491 |
|   |          |          |          | C  | 4.71635  | -1.20713 | -1.09391 |
|   |          |          |          | H  | 5.42583  | -1.15692 | -1.93968 |

**F<sub>o</sub>-tBu**

SCF (BP86) Energy = -1387.22340978

Enthalpy 0K = -1386.530277

Enthalpy 298K = -1386.485284

Free Energy 298K = -1386.600743

Lowest Frequency = 28.4797 cm<sup>-1</sup>

Second Frequency = 33.1132 cm<sup>-1</sup>

H 5.31655 -1.27242 -0.17316  
H 4.14802 -2.14417 -1.20389  
C -0.30971 -3.11589 1.90056  
C -0.18716 -2.16841 1.11474  
C 0.00161 -1.94617 -1.69062  
H -0.38690 -3.93637 2.59138  
C -0.14506 -1.00304 -2.88304  
H 0.62319 -0.21851 -2.91159  
H -0.04742 -1.59362 -3.81892  
H -1.13295 -0.51824 -2.91096  
C 1.33391 -2.69578 -1.64953  
H 1.38073 -3.36860 -2.53064  
H 2.20596 -2.03632 -1.70316  
H 1.41029 -3.31908 -0.74615  
C -1.11075 -2.99267 -1.65851  
H -1.04095 -3.58925 -2.59122  
H -1.00697 -3.67408 -0.80313  
H -2.11235 -2.55394 -1.63824

**Bc-Ar**

SCF (BP86) Energy = -1703.74570599  
Enthalpy 0K = -1702.817243  
Enthalpy 298K = -1702.761544  
Free Energy 298K = -1702.902945  
Lowest Frequency = 10.5454 cm<sup>-1</sup>  
Second Frequency = 12.8652 cm<sup>-1</sup>  
SCF (BP86-D3BJ) Energy = -  
1704.034476  
SCF (FB) Energy = -1703.785879  
SCF (DFB) Energy = -1703.791802  
SCF (BS2) Energy = -2373.429615

Rh 1.19341 -0.01302 -0.42300  
P 1.40872 -2.36315 -0.21731  
P 1.62443 2.32108 -0.40556  
N 2.69102 -0.04002 1.10041  
C 2.89011 -1.17375 1.85200  
C 3.87056 -1.22270 2.85503  
H 3.99707 -2.13984 3.43650  
C 4.66078 -0.09532 3.10798  
H 5.42267 -0.11393 3.89304  
C 4.46498 1.05239 2.33265  
H 5.07601 1.94575 2.48779  
C 3.48622 1.05514 1.32506  
C 1.99605 -2.35280 1.58337  
H 2.47197 -3.29370 1.90490  
H 1.06907 -2.23495 2.17233  
C 3.32935 2.24493 0.41577  
H 3.58497 3.17871 0.94396  
H 4.05332 2.14507 -0.41386  
C 2.94499 -3.00647 -1.23415  
C 3.90273 -1.80486 -1.42482  
H 4.35895 -1.47914 -0.47604  
H 4.72424 -2.10943 -2.09966  
H 3.38477 -0.93872 -1.87456  
C 3.72049 -4.14133 -0.53221  
H 3.11611 -5.04420 -0.36373  
H 4.57451 -4.43324 -1.17090  
H 4.14265 -3.81795 0.43416  
C 2.46613 -3.46351 -2.63023  
H 1.87372 -2.68355 -3.13855  
H 3.35024 -3.67109 -3.26020  
H 1.86957 -4.38837 -2.59456  
C -0.02040 -3.68232 -0.20291

C -0.96618 -3.33518 0.96970  
H -1.27489 -2.27705 0.96585  
H -1.88373 -3.94242 0.86757  
H -0.52926 -3.58254 1.95188  
C -0.81479 -3.56024 -1.52513  
H -0.20380 -3.78294 -2.41257  
H -1.64433 -4.29050 -1.50555  
H -1.24993 -2.55687 -1.64695  
C 0.48429 -5.12886 -0.01829  
H 1.09275 -5.25315 0.89359  
H -0.39196 -5.79545 0.08326  
H 1.06538 -5.49118 -0.88057  
C 2.04836 3.18675 -2.09125  
C 2.79610 2.13198 -2.94178  
H 2.20741 1.21109 -3.07024  
H 2.99827 2.55851 -3.94127  
H 3.77301 1.85354 -2.50911  
C 0.73292 3.57271 -2.80313  
H 0.22872 4.41853 -2.30896  
H 0.96015 3.88941 -3.83736  
H 0.02642 2.72741 -2.85596  
C 2.95629 4.42833 -1.94628  
H 3.91518 4.19952 -1.45145  
H 3.20049 4.80337 -2.95720  
H 2.47500 5.25230 -1.40118  
C 0.61291 3.46775 0.78812  
C 0.69405 2.78660 2.17470  
H 1.71050 2.81540 2.60279  
H 0.02995 3.32437 2.87547  
H 0.36436 1.73449 2.13171  
C 1.15336 4.90812 0.89384  
H 0.96734 5.48978 -0.02254  
H 0.62423 5.42425 1.71605  
H 2.23115 4.95478 1.12532  
C -0.86196 3.49914 0.33164  
H -1.45117 4.06792 1.07423  
H -0.99211 3.99965 -0.64007  
H -1.29587 2.49005 0.26270  
C -0.00521 0.01295 -2.14548  
H 0.22938 -0.00155 -3.20404  
C -0.83120 0.03822 -1.17314  
C -2.12892 0.04379 -0.54099  
C -3.27873 0.00704 -1.37186  
C -2.28125 0.08563 0.86503  
H -3.13783 -0.02440 -2.45487  
H -1.37494 0.11960 1.47606  
C -4.56809 0.01486 -0.81576  
C -3.55998 0.08750 1.45368  
C -4.67684 0.05363 0.59279  
H -5.67790 0.05925 1.03674  
C -5.84534 -0.01620 -1.68348  
C -6.67700 -1.27712 -1.32626  
C -5.52658 -0.05718 -3.19418  
H -4.95947 0.83191 -3.52068  
H -4.95210 -0.95839 -3.47096  
H -6.46718 -0.07710 -3.76960  
H -6.10616 -2.19979 -1.52760  
H -7.59955 -1.30739 -1.93153  
H -6.97480 -1.28873 -0.26452  
C -3.77533 0.13017 2.98250  
C -2.44239 0.13534 3.76250  
C -4.58995 -1.11489 3.42436  
H -5.57702 -1.15709 2.93520  
H -4.05358 -2.04808 3.18080

|   |          |          |          |
|---|----------|----------|----------|
| H | -4.75936 | -1.09216 | 4.51497  |
| H | -1.84445 | -0.77084 | 3.55969  |
| H | -2.64677 | 0.16057  | 4.84609  |
| H | -1.82707 | 1.01965  | 3.52151  |
| C | -4.56130 | 1.41637  | 3.35304  |
| H | -4.00296 | 2.32170  | 3.05915  |
| H | -5.54545 | 1.45311  | 2.85738  |
| H | -4.73381 | 1.45851  | 4.44265  |
| C | -6.68753 | 1.25593  | -1.39743 |
| H | -6.12368 | 2.17046  | -1.64903 |
| H | -7.60963 | 1.24511  | -2.00408 |
| H | -6.98641 | 1.32382  | -0.33812 |

**TS (B-10)<sub>C-Ar</sub>**

SCF (BP86) Energy = -1703.67519659  
 Enthalpy 0K = -1702.749993  
 Enthalpy 298K = -1702.694684  
 Free Energy 298K = -1702.836213  
 Lowest Frequency = -650.9261 cm<sup>-1</sup>  
 Second Frequency = 7.7380 cm<sup>-1</sup>  
 SCF (BP86-D3BJ) Energy = -  
 1703.962758  
 SCF (FB) Energy = -1703.71588  
 SCF (DFB) Energy = -1703.721913  
 SCF (BS2) Energy = -2373.358009

|    |         |          |          |
|----|---------|----------|----------|
| Rh | 1.24522 | 0.08455  | -0.36527 |
| P  | 2.26615 | -2.03615 | -0.19680 |
| P  | 0.74762 | 2.40331  | -0.23348 |
| N  | 3.04278 | 0.70711  | 0.58736  |
| C  | 3.87229 | -0.20184 | 1.19719  |
| C  | 5.08348 | 0.19143  | 1.78704  |
| H  | 5.71570 | -0.56199 | 2.26447  |
| C  | 5.45673 | 1.54039  | 1.77385  |
| H  | 6.39229 | 1.86447  | 2.23930  |
| C  | 4.61517 | 2.46447  | 1.14534  |
| H  | 4.88103 | 3.52374  | 1.09481  |
| C  | 3.42426 | 2.02617  | 0.54438  |
| C  | 3.41331 | -1.63259 | 1.25120  |
| H  | 4.26818 | -2.32242 | 1.33998  |
| H  | 2.79215 | -1.76481 | 2.15444  |
| C  | 2.55284 | 2.97195  | -0.23163 |
| H  | 2.68810 | 4.01185  | 0.10572  |
| H  | 2.85819 | 2.92979  | -1.29226 |
| C  | 3.45681 | -2.43417 | -1.68194 |
| C  | 3.94573 | -1.06718 | -2.21992 |
| H  | 4.56852 | -0.52885 | -1.48585 |
| H  | 4.57040 | -1.24430 | -3.11496 |
| H  | 3.10008 | -0.41950 | -2.50584 |
| C  | 4.68502 | -3.28249 | -1.29054 |
| H  | 4.42389 | -4.27530 | -0.89653 |
| H  | 5.30291 | -3.44107 | -2.19326 |
| H  | 5.32768 | -2.77193 | -0.55365 |
| C  | 2.64838 | -3.13457 | -2.79615 |
| H  | 1.74671 | -2.55966 | -3.07017 |
| H  | 3.27827 | -3.20552 | -3.70145 |
| H  | 2.35524 | -4.16165 | -2.52482 |
| C  | 1.33642 | -3.62281 | 0.43959  |
| C  | 0.76865 | -3.29228 | 1.84064  |
| H  | 0.26379 | -2.31053 | 1.85858  |
| H  | 0.02070 | -4.05948 | 2.11014  |
| H  | 1.54026 | -3.31000 | 2.62812  |
| C  | 0.14228 | -3.93298 | -0.49462 |
| H  | 0.43203 | -4.05173 | -1.54967 |

|   |          |          |          |
|---|----------|----------|----------|
| H | -0.32121 | -4.88373 | -0.17353 |
| H | -0.63865 | -3.15835 | -0.42178 |
| C | 2.25363  | -4.85957 | 0.54132  |
| H | 3.15667  | -4.67048 | 1.14586  |
| H | 1.69542  | -5.67583 | 1.03591  |
| H | 2.56483  | -5.23384 | -0.44670 |
| C | 0.00992  | 3.38090  | -1.74353 |
| C | 0.87945  | 3.04530  | -2.97936 |
| H | 1.01521  | 1.95769  | -3.10692 |
| H | 0.36349  | 3.42480  | -3.87981 |
| H | 1.86779  | 3.53452  | -2.95287 |
| C | -1.42488 | 2.87663  | -2.02065 |
| H | -2.11131 | 3.03575  | -1.17641 |
| H | -1.82973 | 3.43113  | -2.88685 |
| H | -1.43353 | 1.80679  | -2.28076 |
| C | -0.00000 | 4.90777  | -1.52069 |
| H | 0.99688  | 5.30849  | -1.26990 |
| H | -0.32083 | 5.40005  | -2.45703 |
| H | -0.70945 | 5.21457  | -0.73564 |
| C | 0.06163  | 3.05424  | 1.47109  |
| C | 0.50723  | 2.02868  | 2.54043  |
| H | 1.60342  | 1.99485  | 2.65488  |
| H | 0.08200  | 2.32516  | 3.51729  |
| H | 0.15890  | 1.01037  | 2.29912  |
| C | 0.61166  | 4.44301  | 1.86262  |
| H | 0.37778  | 5.22768  | 1.12796  |
| H | 0.15161  | 4.74467  | 2.82149  |
| H | 1.70220  | 4.42928  | 2.02538  |
| C | -1.48131 | 3.09160  | 1.42949  |
| H | -1.85818 | 3.29524  | 2.44870  |
| H | -1.86365 | 3.89381  | 0.77836  |
| H | -1.91380 | 2.13157  | 1.10098  |
| C | 0.11142  | -0.25678 | -2.06767 |
| H | -0.43313 | -1.52268 | -1.67533 |
| C | -0.74911 | -0.52060 | -1.06771 |
| C | -2.10997 | -0.54674 | -0.51042 |
| C | -2.31739 | -0.67694 | 0.87846  |
| C | -3.21190 | -0.48155 | -1.39546 |
| H | -1.43936 | -0.72573 | 1.52738  |
| H | -3.01977 | -0.38897 | -2.46714 |
| C | -3.62224 | -0.73480 | 1.40650  |
| C | -4.52684 | -0.53690 | -0.90222 |
| C | -4.69630 | -0.66302 | 0.49480  |
| H | -5.71668 | -0.71039 | 0.88985  |
| C | -3.90789 | -0.88608 | 2.91641  |
| C | -4.75795 | 0.31703  | 3.40499  |
| C | -2.61174 | -0.93578 | 3.75445  |
| H | -1.97744 | -1.79728 | 3.48135  |
| H | -2.01395 | -0.01403 | 3.64461  |
| H | -2.86516 | -1.03975 | 4.82275  |
| H | -4.22180 | 1.26999  | 3.25586  |
| H | -4.97933 | 0.21415  | 4.48143  |
| H | -5.72100 | 0.38564  | 2.87258  |
| C | -5.76340 | -0.46879 | -1.82422 |
| C | -5.37575 | -0.33296 | -3.31311 |
| C | -6.62849 | 0.75834  | -1.43029 |
| H | -6.97560 | 0.70168  | -0.38505 |
| H | -6.06288 | 1.69843  | -1.54880 |
| H | -7.52230 | 0.81432  | -2.07530 |
| H | -4.80153 | 0.58941  | -3.50868 |
| H | -6.28907 | -0.28819 | -3.92939 |
| H | -4.78281 | -1.19438 | -3.66661 |
| C | -4.69412 | -2.20291 | 3.15707  |
| H | -4.11252 | -3.08002 | 2.82531  |

H -4.91326 -2.32405 4.23209  
H -5.65564 -2.21297 2.61769  
C -6.59881 -1.76603 -1.65348  
H -6.01160 -2.65717 -1.93355  
H -6.94511 -1.90153 -0.61528  
H -7.49231 -1.72873 -2.30030

**TS (B-C)** <sub>C-Ar</sub>

SCF (BP86) Energy = -1703.73631205  
Enthalpy 0K = -1702.809367  
Enthalpy 298K = -1702.754165  
Free Energy 298K = -1702.895027  
Lowest Frequency = -36.3608 cm<sup>-1</sup>  
Second Frequency = 8.8987 cm<sup>-1</sup>  
SCF (BP86-D3BJ) Energy = -1704.01612  
SCF (FB) Energy = -1703.774232  
SCF (DFB) Energy = -1703.77957  
SCF (BS2) Energy = -2373.419562

Rh 1.59996 -0.05507 0.24332  
P 2.11989 2.21942 0.17555  
P 1.58849 -2.38025 0.07123  
N 3.49657 -0.25025 -0.69608  
C 4.14124 0.84339 -1.22749  
C 5.39472 0.73483 -1.84855  
H 5.86719 1.63439 -2.25314  
C 6.01408 -0.51443 -1.96197  
H 6.98697 -0.61653 -2.45131  
C 5.35604 -1.62950 -1.43226  
H 5.80462 -2.62533 -1.48895  
C 4.11386 -1.47602 -0.79794  
C 3.43685 2.17449 -1.17420  
H 4.16130 3.00335 -1.09909  
H 2.88534 2.32031 -2.12177  
C 3.44096 -2.66070 -0.15535  
H 3.67536 -3.59185 -0.69857  
H 3.84181 -2.78020 0.86850  
C 3.04792 2.89859 1.73565  
C 4.30169 2.00915 1.91087  
H 5.04020 2.15437 1.10473  
H 4.79790 2.27517 2.86202  
H 4.03514 0.93902 1.95204  
C 3.47837 4.37407 1.61745  
H 2.61967 5.06437 1.62071  
H 4.10792 4.63539 2.48798  
H 4.07982 4.56964 0.71325  
C 2.14133 2.70514 2.97218  
H 1.87939 1.64262 3.11014  
H 2.68644 3.03491 3.87540  
H 1.20935 3.28892 2.91684  
C 0.85785 3.49985 -0.54308  
C 0.07275 2.73713 -1.63699  
H -0.43646 1.84870 -1.23118  
H -0.68685 3.41343 -2.07132  
H 0.72059 2.40518 -2.46714  
C -0.11969 3.93534 0.56995  
H 0.36413 4.57570 1.32537  
H -0.93738 4.52894 0.12062  
H -0.57108 3.06874 1.08170  
C 1.52196 4.74257 -1.17677  
H 2.19842 4.48307 -2.00811  
H 0.73092 5.38954 -1.59903  
H 2.08481 5.34651 -0.45042  
C 1.20970 -3.49306 1.61322

C 1.75226 -2.72342 2.84099  
H 1.26877 -1.74082 2.95603  
H 1.55186 -3.31554 3.75274  
H 2.84276 -2.55926 2.79307  
C -0.31737 -3.66093 1.76563  
H -0.74749 -4.29427 0.97264  
H -0.53338 -4.15492 2.73059  
H -0.83565 -2.68719 1.76241  
C 1.89084 -4.87877 1.55424  
H 2.98951 -4.80765 1.49369  
H 1.65708 -5.42749 2.48511  
H 1.53881 -5.49490 0.71435  
C 0.79198 -3.07121 -1.55507  
C 1.52567 -2.36373 -2.71907  
H 2.58169 -2.67035 -2.80388  
H 1.02857 -2.63226 -3.66910  
H 1.48816 -1.26594 -2.61161  
C 0.91294 -4.59811 -1.72403  
H 0.30151 -5.15092 -0.99283  
H 0.54811 -4.87819 -2.72959  
H 1.95471 -4.95360 -1.64776  
C -0.69215 -2.64445 -1.58808  
H -1.12866 -2.92752 -2.56362  
H -1.28913 -3.13609 -0.80407  
H -0.79726 -1.55358 -1.46863  
C -0.18430 0.13825 1.20744  
H 0.17587 0.24385 2.25172  
C -1.42010 0.17045 0.88175  
C -2.77274 0.19714 0.50583  
C -3.54064 -1.00710 0.50604  
C -3.39824 1.43285 0.15698  
H -3.03943 -1.93623 0.78496  
H -2.78996 2.33938 0.17247  
C -4.89944 -0.99225 0.16809  
C -4.75425 1.47776 -0.18979  
C -5.47004 0.25679 -0.17515  
H -6.53203 0.28052 -0.44218  
C -5.77717 -2.26154 0.16278  
C -6.94095 -2.08059 1.17414  
C -4.97805 -3.52152 0.56074  
H -4.14856 -3.72161 -0.14009  
H -4.56415 -3.44301 1.58110  
H -5.64293 -4.40093 0.54249  
H -6.55938 -1.93017 2.19830  
H -7.58239 -2.97855 1.17650  
H -7.57953 -1.21785 0.92086  
C -5.47996 2.78483 -0.57259  
C -4.53773 4.00732 -0.52430  
C -6.64939 3.02915 0.41864  
H -7.38543 2.20807 0.40166  
H -6.28037 3.13162 1.45328  
H -7.18271 3.95772 0.15202  
H -4.12740 4.17207 0.48727  
H -5.09684 4.91538 -0.80460  
H -3.69650 3.90662 -1.23248  
C -6.04045 2.65413 -2.01421  
H -5.22983 2.48614 -2.74370  
H -6.75641 1.82035 -2.10635  
H -6.57062 3.57918 -2.29881  
C -6.35622 -2.47730 -1.26110  
H -5.55088 -2.61584 -2.00252  
H -6.99429 -3.37752 -1.27686  
H -6.97609 -1.62655 -1.59013

**C<sub>C-Ar</sub>**

SCF (BP86) Energy = -1703.74066861  
 Enthalpy 0K = -1702.813665  
 Enthalpy 298K = -1702.757994  
 Free Energy 298K = -1702.900785  
 Lowest Frequency = 7.1847 cm<sup>-1</sup>  
 Second Frequency = 13.4312 cm<sup>-1</sup>  
 SCF (BP86-D3BJ) Energy = -1704.01675  
 SCF (FB) Energy = -1703.780561  
 SCF (DFB) Energy = -1703.786443  
 SCF (BS2) Energy = -2373.426879

|    |          |          |          |
|----|----------|----------|----------|
| Rh | 1.69118  | 0.00607  | 0.10953  |
| P  | 2.03275  | 2.31229  | -0.12944 |
| P  | 1.85518  | -2.32410 | 0.25398  |
| N  | 3.77072  | -0.09845 | -0.22526 |
| C  | 4.46181  | 0.98727  | -0.71253 |
| C  | 5.84131  | 0.92710  | -0.96293 |
| H  | 6.35195  | 1.81551  | -1.34456 |
| C  | 6.54066  | -0.26395 | -0.74285 |
| H  | 7.61454  | -0.32732 | -0.94130 |
| C  | 5.83463  | -1.37299 | -0.26430 |
| H  | 6.34320  | -2.32168 | -0.07202 |
| C  | 4.46012  | -1.26959 | -0.00338 |
| C  | 3.69138  | 2.24380  | -1.02752 |
| H  | 4.31074  | 3.13989  | -0.85230 |
| H  | 3.44010  | 2.24107  | -2.10452 |
| C  | 3.70997  | -2.43472 | 0.58671  |
| H  | 4.15279  | -3.39251 | 0.26557  |
| H  | 3.80535  | -2.39194 | 1.68793  |
| C  | 2.39973  | 3.26191  | 1.51509  |
| C  | 3.60716  | 2.54574  | 2.16467  |
| H  | 4.53904  | 2.67943  | 1.58976  |
| H  | 3.77788  | 2.97545  | 3.16839  |
| H  | 3.41898  | 1.46494  | 2.28373  |
| C  | 2.73238  | 4.75320  | 1.31059  |
| H  | 1.86295  | 5.33316  | 0.96237  |
| H  | 3.04546  | 5.18621  | 2.27832  |
| H  | 3.56377  | 4.91035  | 0.60214  |
| C  | 1.17916  | 3.10783  | 2.45081  |
| H  | 0.95593  | 2.04555  | 2.64611  |
| H  | 1.40654  | 3.58726  | 3.42024  |
| H  | 0.27082  | 3.58383  | 2.05067  |
| C  | 0.94044  | 3.32367  | -1.36352 |
| C  | 0.57604  | 2.34113  | -2.50227 |
| H  | 0.03041  | 1.46342  | -2.12183 |
| H  | -0.06638 | 2.86577  | -3.23309 |
| H  | 1.46424  | 1.98305  | -3.05267 |
| C  | -0.35431 | 3.76869  | -0.65022 |
| H  | -0.16804 | 4.54308  | 0.11167  |
| H  | -1.04225 | 4.20499  | -1.39714 |
| H  | -0.86830 | 2.91593  | -0.17678 |
| C  | 1.66678  | 4.54962  | -1.96053 |
| H  | 2.57522  | 4.27370  | -2.52167 |
| H  | 0.98715  | 5.04427  | -2.67832 |
| H  | 1.94260  | 5.29734  | -1.20273 |
| C  | 1.11166  | -3.28831 | 1.75959  |
| C  | 1.20964  | -2.34365 | 2.98126  |
| H  | 0.59560  | -1.43829 | 2.85365  |
| H  | 0.84117  | -2.87997 | 3.87469  |
| H  | 2.24431  | -2.02448 | 3.19579  |
| C  | -0.37586 | -3.60184 | 1.48917  |
| H  | -0.50460 | -4.36712 | 0.70672  |
| H  | -0.83180 | -4.00065 | 2.41355  |

|   |          |          |          |
|---|----------|----------|----------|
| H | -0.93874 | -2.69884 | 1.19917  |
| C | 1.88148  | -4.59150 | 2.07362  |
| H | 2.93461  | -4.40681 | 2.34353  |
| H | 1.40865  | -5.07698 | 2.94679  |
| H | 1.85864  | -5.31459 | 1.24550  |
| C | 1.58765  | -3.23599 | -1.43195 |
| C | 2.56332  | -2.57222 | -2.43272 |
| H | 3.62142  | -2.76659 | -2.18899 |
| H | 2.37663  | -2.98901 | -3.43902 |
| H | 2.40976  | -1.48054 | -2.48539 |
| C | 1.86022  | -4.75180 | -1.37604 |
| H | 1.11633  | -5.28868 | -0.76620 |
| H | 1.79821  | -5.16422 | -2.39990 |
| H | 2.86666  | -4.99123 | -0.99184 |
| C | 0.14241  | -2.96440 | -1.90760 |
| H | 0.02173  | -3.36394 | -2.93111 |
| H | -0.60972 | -3.45537 | -1.27116 |
| H | -0.07793 | -1.88478 | -1.92912 |
| C | -0.30960 | 0.07924  | 0.27938  |
| H | 0.35146  | 0.13557  | 1.27726  |
| C | -1.56517 | 0.08383  | 0.22944  |
| C | -2.97876 | 0.07415  | 0.12344  |
| C | -3.67124 | -1.15292 | -0.07007 |
| C | -3.71428 | 1.28724  | 0.21905  |
| H | -3.08450 | -2.07125 | -0.14359 |
| H | -3.16209 | 2.21699  | 0.37210  |
| C | -5.06980 | -1.18182 | -0.17478 |
| C | -5.11432 | 1.28941  | 0.13115  |
| C | -5.75866 | 0.04742  | -0.06719 |
| H | -6.85134 | 0.03689  | -0.14134 |
| C | -5.86400 | -2.48731 | -0.39582 |
| C | -6.84060 | -2.70025 | 0.79160  |
| C | -4.94138 | -3.72202 | -0.49288 |
| H | -4.23833 | -3.64477 | -1.34070 |
| H | -4.35897 | -3.87470 | 0.43256  |
| H | -5.55106 | -4.62724 | -0.65153 |
| H | -6.29350 | -2.78916 | 1.74569  |
| H | -7.42302 | -3.62608 | 0.64301  |
| H | -7.55790 | -1.86857 | 0.89048  |
| C | -5.95556 | 2.57948  | 0.24047  |
| C | -5.07774 | 3.83208  | 0.45426  |
| C | -6.92850 | 2.45528  | 1.44344  |
| H | -7.61507 | 1.59953  | 1.33238  |
| H | -6.37631 | 2.32463  | 2.38972  |
| H | -7.54438 | 3.36725  | 1.52940  |
| H | -4.49242 | 3.77084  | 1.38836  |
| H | -5.72031 | 4.72551  | 0.52613  |
| H | -4.38000 | 3.99441  | -0.38586 |
| C | -6.77060 | 2.77194  | -1.06631 |
| H | -6.10399 | 2.87062  | -1.94008 |
| H | -7.45252 | 1.92638  | -1.25618 |
| H | -7.38520 | 3.68637  | -0.99934 |
| C | -6.67169 | -2.37784 | -1.71673 |
| H | -6.00205 | -2.23210 | -2.58152 |
| H | -7.25206 | -3.30163 | -1.88473 |
| H | -7.38445 | -1.53666 | -1.69647 |

**TS (C-D)<sub>C-Ar</sub>**

SCF (BP86) Energy = -1703.67671836  
 Enthalpy 0K = -1702.750836  
 Enthalpy 298K = -1702.695386  
 Free Energy 298K = -1702.837846  
 Lowest Frequency = -289.2775 cm<sup>-1</sup>  
 Second Frequency = 4.9307 cm<sup>-1</sup>

SCF (BP86-D3BJ) Energy = -  
 1703.962095  
 SCF (FB) Energy = -1703.718223  
 SCF (DFB) Energy = -1703.724606  
 SCF (BS2) Energy = -2373.359839

|    |          |          |          |
|----|----------|----------|----------|
| Rh | 1.31222  | 0.07110  | -0.22090 |
| P  | 0.57222  | 2.28205  | -0.45817 |
| P  | 2.69396  | -1.87229 | 0.04827  |
| N  | 2.99750  | 1.01139  | 0.68404  |
| C  | 3.18105  | 2.37106  | 0.57196  |
| C  | 4.23034  | 3.03125  | 1.22793  |
| H  | 4.32772  | 4.11518  | 1.12231  |
| C  | 5.15285  | 2.29561  | 1.98053  |
| H  | 5.97885  | 2.79347  | 2.49656  |
| C  | 5.00683  | 0.90575  | 2.03629  |
| H  | 5.71862  | 0.28845  | 2.59130  |
| C  | 3.92942  | 0.28465  | 1.38444  |
| C  | 2.26149  | 3.11550  | -0.35529 |
| H  | 2.20504  | 4.18405  | -0.09807 |
| H  | 2.68027  | 3.05115  | -1.37575 |
| C  | 3.76558  | -1.21028 | 1.45287  |
| H  | 4.74961  | -1.70519 | 1.51194  |
| H  | 3.21988  | -1.47519 | 2.37826  |
| C  | -0.44541 | 3.12852  | 0.96447  |
| C  | -0.05568 | 2.38200  | 2.26195  |
| H  | 1.02190  | 2.46157  | 2.48409  |
| H  | -0.60430 | 2.82958  | 3.11081  |
| H  | -0.31398 | 1.31196  | 2.20835  |
| C  | -0.10808 | 4.62806  | 1.12437  |
| H  | -0.26595 | 5.20928  | 0.20255  |
| H  | -0.77385 | 5.05332  | 1.89721  |
| H  | 0.92533  | 4.79506  | 1.47079  |
| C  | -1.95863 | 2.96496  | 0.71237  |
| H  | -2.24872 | 1.91690  | 0.53516  |
| H  | -2.50339 | 3.31005  | 1.60981  |
| H  | -2.30612 | 3.57884  | -0.13400 |
| C  | -0.04666 | 2.74496  | -2.23394 |
| C  | 1.01896  | 2.23035  | -3.23303 |
| H  | 1.25026  | 1.16343  | -3.06845 |
| H  | 0.61448  | 2.33157  | -4.25620 |
| H  | 1.95676  | 2.81024  | -3.20588 |
| C  | -1.36414 | 1.99670  | -2.52999 |
| H  | -2.19252 | 2.29603  | -1.87210 |
| H  | -1.66691 | 2.21856  | -3.56917 |
| H  | -1.22898 | 0.90652  | -2.44561 |
| C  | -0.23730 | 4.26714  | -2.40231 |
| H  | 0.67557  | 4.83953  | -2.16450 |
| H  | -0.48887 | 4.47940  | -3.45752 |
| H  | -1.06520 | 4.65577  | -1.78779 |
| C  | 2.11293  | -3.57684 | 0.77500  |
| C  | 1.02200  | -3.28089 | 1.83222  |
| H  | 0.09135  | -2.92158 | 1.36966  |
| H  | 0.78556  | -4.22002 | 2.36435  |
| H  | 1.34333  | -2.54949 | 2.59446  |
| C  | 1.49901  | -4.44575 | -0.34538 |
| H  | 2.26263  | -4.82493 | -1.04296 |
| H  | 1.01347  | -5.32583 | 0.11429  |
| H  | 0.73477  | -3.89856 | -0.92205 |
| C  | 3.26950  | -4.33427 | 1.46671  |
| H  | 3.65852  | -3.79702 | 2.34747  |
| H  | 2.88094  | -5.30353 | 1.82910  |
| H  | 4.10927  | -4.54996 | 0.79191  |
| C  | 3.88582  | -2.09066 | -1.46613 |

|   |          |          |          |
|---|----------|----------|----------|
| C | 4.56883  | -0.71968 | -1.68695 |
| H | 5.25371  | -0.44811 | -0.86592 |
| H | 5.16967  | -0.77212 | -2.61284 |
| H | 3.82954  | 0.09091  | -1.80838 |
| C | 4.97630  | -3.16323 | -1.26186 |
| H | 4.56289  | -4.18361 | -1.23310 |
| H | 5.67401  | -3.12282 | -2.11845 |
| H | 5.57639  | -2.99925 | -0.34997 |
| C | 3.03935  | -2.42240 | -2.71654 |
| H | 3.70236  | -2.41877 | -3.60093 |
| H | 2.57250  | -3.41663 | -2.65707 |
| H | 2.23521  | -1.68699 | -2.87441 |
| C | 0.01461  | -1.25283 | -1.30476 |
| H | -0.14395 | -0.96789 | 0.69157  |
| C | -0.80295 | -1.03312 | -0.25486 |
| C | -2.24632 | -0.85015 | -0.04323 |
| C | -3.14075 | -0.95912 | -1.13354 |
| C | -2.75958 | -0.67118 | 1.26099  |
| H | -2.72950 | -1.13407 | -2.13282 |
| H | -2.05669 | -0.61893 | 2.10033  |
| C | -4.53117 | -0.88924 | -0.93828 |
| C | -4.14541 | -0.59186 | 1.49526  |
| C | -5.00403 | -0.69782 | 0.37969  |
| H | -6.08119 | -0.64723 | 0.54440  |
| C | -5.48216 | -1.04817 | -2.14612 |
| C | -5.25692 | -2.44462 | -2.78599 |
| C | -5.17428 | 0.05385  | -3.19448 |
| H | -5.33895 | 1.06023  | -2.77231 |
| H | -4.13306 | 0.00038  | -3.55480 |
| H | -5.83590 | -0.05990 | -4.07066 |
| H | -4.21860 | -2.57630 | -3.13375 |
| H | -5.92148 | -2.57387 | -3.65784 |
| H | -5.47728 | -3.25094 | -2.06596 |
| C | -4.67646 | -0.43278 | 2.93791  |
| C | -4.11309 | 0.87346  | 3.55729  |
| C | -4.21087 | -1.64638 | 3.78714  |
| H | -4.60009 | -2.59208 | 3.37346  |
| H | -3.11103 | -1.72333 | 3.82936  |
| H | -4.57877 | -1.54951 | 4.82338  |
| H | -3.01003 | 0.87356  | 3.58557  |
| H | -4.47310 | 0.99059  | 4.59424  |
| H | -4.44042 | 1.75690  | 2.98233  |
| C | -6.96910 | -0.93234 | -1.74500 |
| H | -7.26563 | -1.71618 | -1.02699 |
| H | -7.20414 | 0.05155  | -1.30323 |
| H | -7.60207 | -1.05141 | -2.64036 |
| C | -6.21876 | -0.36705 | 2.99382  |
| H | -6.61718 | 0.49258  | 2.42773  |
| H | -6.68568 | -1.28726 | 2.60298  |
| H | -6.54479 | -0.25255 | 4.04120  |

**TS (C-10)<sub>C-Ar</sub>**

SCF (BP86) Energy = -1703.72209941  
 Enthalpy 0K = -1702.797832  
 Enthalpy 298K = -1702.741976  
 Free Energy 298K = -1702.885532  
 Lowest Frequency = -659.6256 cm<sup>-1</sup>  
 Second Frequency = 6.9136 cm<sup>-1</sup>  
 SCF (BP86-D3BJ) Energy = -  
 1703.997127  
 SCF (FB) Energy = -1703.760689  
 SCF (DFB) Energy = -1703.766389  
 SCF (BS2) Energy = -2373.40685



Rh -1.65729 0.02392 0.05280  
 P -1.99746 -2.26094 0.37411  
 P -1.84415 2.31413 -0.32378  
 N -3.77385 0.06898 -0.10320  
 C -4.49509 -1.09323 -0.24355  
 C -5.89504 -1.08367 -0.34259  
 H -6.42896 -2.03203 -0.44918  
 C -6.58701 0.13199 -0.32666  
 H -7.67737 0.15637 -0.41202  
 C -5.85247 1.31586 -0.20081  
 H -6.35356 2.28755 -0.17860  
 C -4.45516 1.26315 -0.07974  
 C -3.73749 -2.39266 -0.34801  
 H -4.32139 -3.22578 0.07912  
 H -3.58955 -2.62610 -1.41880  
 C -3.66459 2.52870 0.13382  
 H -4.14173 3.38237 -0.37710  
 H -3.66551 2.76517 1.21411  
 C -2.19287 -2.81428 2.22047  
 C -3.33895 -1.95499 2.80423  
 H -4.32068 -2.20575 2.36858  
 H -3.40637 -2.14040 3.89177  
 H -3.15170 -0.87788 2.65215  
 C -2.52387 -4.30859 2.40192  
 H -1.68502 -4.96284 2.11520  
 H -2.73744 -4.50344 3.46905  
 H -3.41699 -4.61703 1.83199  
 C -0.89106 -2.45769 2.97402  
 H -0.67614 -1.37781 2.89720  
 H -1.01327 -2.70031 4.04546  
 H -0.01684 -3.01857 2.60723  
 C -1.02186 -3.55299 -0.68880  
 C -0.77954 -2.87055 -2.05638  
 H -0.22891 -1.92252 -1.94772  
 H -0.19109 -3.55210 -2.69820  
 H -1.72047 -2.65405 -2.59180  
 C 0.34128 -3.84189 -0.02392  
 H 0.23897 -4.40494 0.91795  
 H 0.95036 -4.46163 -0.70743  
 H 0.90471 -2.91542 0.17808  
 C -1.78705 -4.87653 -0.91181  
 H -2.75128 -4.72658 -1.42518  
 H -1.17855 -5.53181 -1.56185  
 H -1.97557 -5.42625 0.02182  
 C -0.98340 3.58837 0.85330  
 C -0.96143 2.92386 2.25028  
 H -0.42558 1.96147 2.23549  
 H -0.45372 3.60002 2.96268  
 H -1.97504 2.73666 2.64571  
 C 0.46899 3.82417 0.38532  
 H 0.51727 4.39685 -0.55501  
 H 1.00210 4.41484 1.15294  
 H 1.01468 2.87616 0.24609  
 C -1.72948 4.93813 0.94889  
 H -2.75688 4.82773 1.33366  
 H -1.19080 5.59079 1.66027  
 H -1.77679 5.47077 -0.01218  
 C -1.73578 2.83400 -2.18470  
 C -2.80681 1.99606 -2.92221  
 H -3.83539 2.27892 -2.64116  
 H -2.70567 2.16610 -4.00960  
 H -2.67435 0.91700 -2.73127  
 C -1.98885 4.33275 -2.43955  
 H -1.18573 4.96912 -2.03475

H -2.02485 4.51095 -3.53010  
 H -2.95107 4.67835 -2.02391  
 C -0.34511 2.42172 -2.71940  
 H -0.30711 2.60970 -3.80804  
 H 0.47486 2.99259 -2.25681  
 H -0.15837 1.34824 -2.54987  
 C 0.28024 0.00242 0.10968  
 H 0.74275 -0.36501 1.17993  
 C 1.56330 0.01579 0.09986  
 C 2.99392 -0.02172 0.06899  
 C 3.75001 1.02520 0.65352  
 C 3.65549 -1.10340 -0.56557  
 H 3.21615 1.84900 1.13670  
 H 3.04845 -1.89606 -1.01268  
 C 5.15423 1.00317 0.61753  
 C 5.05835 -1.14663 -0.63276  
 C 5.77548 -0.08796 -0.03141  
 H 6.86557 -0.11343 -0.07124  
 C 5.95728 2.15052 1.26921  
 C 5.60882 2.22190 2.78021  
 C 5.57500 3.49138 0.58690  
 H 5.81489 3.47249 -0.48982  
 H 4.49969 3.71513 0.69044  
 H 6.13464 4.32397 1.04707  
 H 4.53448 2.40845 2.94818  
 H 6.16850 3.04334 3.25991  
 H 5.87389 1.28261 3.29470  
 C 5.75648 -2.32658 -1.34438  
 C 5.29888 -2.36869 -2.82709  
 C 5.35887 -3.65289 -0.64279  
 H 5.67511 -3.65443 0.41423  
 H 4.26929 -3.82390 -0.67077  
 H 5.84331 -4.50781 -1.14539  
 H 4.20732 -2.49966 -2.91892  
 H 5.78153 -3.21297 -3.34905  
 H 5.57333 -1.43946 -3.35463  
 C 7.48295 1.95298 1.13133  
 H 7.82689 1.02685 1.62342  
 H 7.80387 1.92728 0.07564  
 H 8.00727 2.79497 1.61318  
 C 7.29591 -2.20419 -1.31413  
 H 7.64906 -1.29309 -1.82720  
 H 7.69147 -2.20020 -0.28374  
 H 7.74311 -3.06779 -1.83401

**TS (C-E)<sub>C-Ar</sub>**

SCF (BP86) Energy = -1703.73482687  
 Enthalpy 0K = -1702.809971  
 Enthalpy 298K = -1702.754397  
 Free Energy 298K = -1702.897367  
 Lowest Frequency = -647.5198 cm<sup>-1</sup>  
 Second Frequency = 6.7275 cm<sup>-1</sup>  
 SCF (BP86-D3BJ) Energy = -  
 1704.011606  
 SCF (FB) Energy = -1703.777826  
 SCF (DFB) Energy = -1703.784687  
 SCF (BS2) Energy = -2373.421257

Rh -1.65788 -0.00230 -0.00240  
 P -1.89144 -2.30913 0.35446  
 P -1.93085 2.30512 -0.34502  
 N -3.78879 -0.00705 0.07171  
 C -4.46795 -1.12121 0.50434  
 C -5.87045 -1.15424 0.53363

H -6.37787 -2.05726 0.88392  
 C -6.60147 -0.02797 0.13824  
 H -7.69505 -0.03525 0.16642  
 C -5.90685 1.10721 -0.29463  
 H -6.44332 2.00274 -0.61998  
 C -4.50411 1.09379 -0.33422  
 C -3.66452 -2.29324 1.01152  
 C -3.74424 2.27575 -0.88657  
 C -0.92871 -3.22737 1.75633  
 C -0.73847 -2.21184 2.90791  
 H -1.69115 -1.79107 3.27463  
 H -0.26183 -2.73052 3.75938  
 H -0.08336 -1.37819 2.61003  
 C -1.70104 -4.45678 2.28746  
 H -1.88784 -5.21488 1.51286  
 H -1.09391 -4.93625 3.07652  
 H -2.66559 -4.18588 2.74820  
 C 0.46102 -3.65292 1.23480  
 H 1.00636 -2.80490 0.78840  
 H 1.05903 -4.02770 2.08506  
 H 0.39813 -4.46922 0.49724  
 C -1.96375 -3.30394 -1.30251  
 C -3.05849 -2.62324 -2.15891  
 H -2.85138 -1.54954 -2.31289  
 H -3.07944 -3.10305 -3.15401  
 H -4.06704 -2.72513 -1.72421  
 C -0.60649 -3.14547 -2.02607  
 H 0.20920 -3.67494 -1.51125  
 H -0.69114 -3.57432 -3.04114  
 H -0.31710 -2.08587 -2.12074  
 C -2.30787 -4.79546 -1.12136  
 H -3.25042 -4.95312 -0.56939  
 H -2.43558 -5.25618 -2.11813  
 H -1.50565 -5.35024 -0.60968  
 C -1.90692 3.40681 1.24067  
 C -2.97984 2.81973 2.18814  
 H -2.80955 1.74697 2.38123  
 H -2.92710 3.35134 3.15533  
 H -4.00463 2.94903 1.80101  
 C -0.52408 3.27680 1.91745  
 H 0.28944 3.69006 1.30227  
 H -0.53973 3.83707 2.86976  
 H -0.27936 2.22697 2.14740  
 C -2.22225 4.88874 0.95363  
 H -3.17408 5.02641 0.41254  
 H -2.31554 5.42629 1.91484  
 H -1.42091 5.38308 0.38197  
 C -1.04512 3.10347 -1.86478  
 C -0.98016 1.98962 -2.93783  
 H -1.98086 1.64539 -3.25626  
 H -0.47790 2.39067 -3.83701  
 H -0.40652 1.11940 -2.57988  
 C -1.79797 4.32545 -2.43563  
 H -1.86641 5.15975 -1.72208  
 H -1.24589 4.69401 -3.31929  
 H -2.81681 4.07762 -2.77786  
 C 0.39408 3.49711 -1.46709  
 H 0.94379 3.79936 -2.37683  
 H 0.41490 4.35527 -0.77573  
 H 0.93659 2.65169 -1.01222  
 C 0.29734 0.00163 -0.08003  
 H -0.67443 0.18491 1.19834  
 C 1.54451 0.00761 -0.00378  
 C 2.97106 0.01043 -0.00306

C 3.68578 1.18303 0.35155  
 C 3.69521 -1.15873 -0.34970  
 H 3.11454 2.07671 0.62141  
 H 3.13122 -2.05434 -0.62815  
 C 5.09067 1.20150 0.37231  
 C 5.10031 -1.17035 -0.35466  
 C 5.77110 0.01711 0.01291  
 H 6.86200 0.01966 0.01915  
 C 5.83322 2.49440 0.77879  
 C 5.42256 2.88652 2.22329  
 C 5.44336 3.63764 -0.19579  
 H 5.72821 3.38942 -1.23245  
 H 4.35841 3.83708 -0.18229  
 H 5.95908 4.57225 0.08629  
 H 4.33662 3.06104 2.30902  
 H 5.93652 3.81507 2.52777  
 H 5.69428 2.09422 2.94147  
 C 5.85383 -2.45917 -0.75390  
 C 5.46282 -2.85079 -2.20398  
 C 5.45737 -3.60580 0.21400  
 H 5.72825 -3.35792 1.25452  
 H 4.37364 -3.81035 0.18657  
 H 5.98093 -4.53752 -0.06310  
 H 4.37887 -3.03022 -2.30347  
 H 5.98499 -3.77632 -2.50364  
 H 5.73953 -2.05592 -2.91736  
 C 7.36864 2.32990 0.74051  
 H 7.71803 1.54947 1.43829  
 H 7.73267 2.07993 -0.27097  
 H 7.84864 3.27726 1.03864  
 C 7.38788 -2.28767 -0.69624  
 H 7.74237 -1.50496 -1.38884  
 H 7.73809 -2.03705 0.31997  
 H 7.87593 -3.23250 -0.98930  
 H -4.26731 3.22012 -0.65956  
 H -3.71968 2.19127 -1.98922  
 H -4.19661 -3.24263 0.83198  
 H -3.55874 -2.19355 2.10840

**E<sub>C-Ar</sub>**

SCF (BP86) Energy = -1703.74219930  
 Enthalpy 0K = -1702.815783  
 Enthalpy 298K = -1702.759968  
 Free Energy 298K = -1702.903927  
 Lowest Frequency = 5.4161 cm<sup>-1</sup>  
 Second Frequency = 10.9140 cm<sup>-1</sup>  
 SCF (BP86-D3BJ) Energy = -  
 1704.019347  
 SCF (FB) Energy = -1703.787548  
 SCF (DFB) Energy = -1703.795464  
 SCF (BS2) Energy = -2373.427734

Rh 1.66394 -0.00229 -0.00788  
 P 1.88623 -2.29887 -0.43372  
 P 1.93704 2.29449 0.40683  
 N 3.80386 -0.02383 -0.00976  
 C 4.48304 -1.12460 -0.46828  
 C 5.88623 -1.15793 -0.48412  
 H 6.39763 -2.05251 -0.85016  
 C 6.61283 -0.04055 -0.05650  
 H 7.70662 -0.04767 -0.07373  
 C 5.91444 1.08689 0.39108  
 H 6.44813 1.97633 0.73726  
 C 4.51124 1.07142 0.41814

C 3.68380 -2.28171 -1.02240  
 C 3.74054 2.24134 0.98471  
 C 0.94717 -3.13127 -1.89979  
 C 0.81998 -2.05897 -3.00754  
 H 1.79886 -1.67974 -3.35200  
 H 0.32478 -2.51603 -3.88332  
 H 0.20978 -1.20560 -2.67307  
 C 1.70156 -4.35909 -2.45841  
 H 1.83266 -5.15872 -1.71448  
 H 1.11204 -4.78038 -3.29262  
 H 2.69232 -4.09942 -2.86755  
 C -0.46997 -3.53314 -1.43540  
 H -1.00228 -2.68536 -0.97298  
 H -1.05179 -3.85589 -2.31755  
 H -0.45421 -4.38026 -0.73065  
 C 1.88636 -3.35298 1.18703  
 C 2.97280 -2.73423 2.09924  
 H 2.79156 -1.66150 2.29011  
 H 2.95291 -3.25136 3.07539  
 H 3.99057 -2.84592 1.68952  
 C 0.51255 -3.19243 1.87766  
 H -0.29951 -3.67716 1.31559  
 H 0.55677 -3.66707 2.87466  
 H 0.24070 -2.13214 2.01214  
 C 2.20051 -4.84385 0.95321  
 H 3.15301 -5.00158 0.41877  
 H 2.29151 -5.34759 1.93305  
 H 1.39904 -5.35715 0.39895  
 C 1.92480 3.46387 -1.12664  
 C 3.04547 2.96862 -2.07079  
 H 2.91965 1.90660 -2.34097  
 H 3.00471 3.55710 -3.00485  
 H 4.05337 3.10409 -1.64382  
 C 0.56295 3.31525 -1.84165  
 H -0.27279 3.69763 -1.23621  
 H 0.58801 3.89657 -2.78104  
 H 0.34584 2.26426 -2.09211  
 C 2.18265 4.93982 -0.75919  
 H 3.12204 5.08205 -0.19769  
 H 2.26939 5.52836 -1.69054  
 H 1.35647 5.37579 -0.17591  
 C 1.01021 3.00347 1.94522  
 C 0.93663 1.83327 2.95676  
 H 1.93379 1.47608 3.27251  
 H 0.41909 2.18243 3.86881  
 H 0.36441 0.98380 2.54724  
 C 1.73644 4.20150 2.59514  
 H 1.81064 5.07139 1.92621  
 H 1.16014 4.51883 3.48320  
 H 2.75034 3.94749 2.94764  
 C -0.42506 3.39874 1.53510  
 H -0.99808 3.64806 2.44649  
 H -0.44163 4.29063 0.88786  
 H -0.94515 2.57042 1.02570  
 C -0.28464 0.00692 0.00153  
 H 1.62873 0.26254 -1.50193  
 C -1.53129 0.00169 -0.02669  
 C -2.96025 0.00728 -0.01518  
 C -3.67655 1.14575 -0.46378  
 C -3.68481 -1.12331 0.43956  
 H -3.10550 2.01009 -0.81698  
 H -3.12049 -1.99384 0.78849  
 C -5.08180 1.16722 -0.47280  
 C -5.09015 -1.12998 0.45921

C -5.76272 0.02218 -0.00416  
 H -6.85362 0.02794 0.00021  
 C -5.82419 2.42258 -0.98420  
 C -5.42786 2.68434 -2.46181  
 C -5.42058 3.64586 -0.11851  
 H -5.69634 3.49126 0.93866  
 H -4.33500 3.83780 -0.15975  
 H -5.93538 4.55455 -0.47699  
 H -4.34220 2.84491 -2.57394  
 H -5.94161 3.58483 -2.84185  
 H -5.71043 1.83291 -3.10412  
 C -5.84212 -2.37727 0.97634  
 C -5.43734 -2.64355 2.45084  
 C -5.45856 -3.60471 0.10746  
 H -5.74068 -3.44683 -0.94753  
 H -4.37481 -3.80836 0.14027  
 H -5.98042 -4.50784 0.46974  
 H -4.35266 -2.81602 2.55459  
 H -5.95794 -3.53840 2.83485  
 H -5.70564 -1.78913 3.09534  
 C -7.35973 2.26934 -0.91578  
 H -7.71921 1.43207 -1.53849  
 H -7.71355 2.11043 0.11751  
 H -7.83962 3.18905 -1.29097  
 C -7.37641 -2.20745 0.91992  
 H -7.72198 -1.36646 1.54548  
 H -7.73651 -2.04449 -0.11056  
 H -7.86329 -3.12200 1.29870  
 H 4.27109 3.18978 0.79566  
 H 3.69163 2.12705 2.08396  
 H 4.20023 -3.23937 -0.84060  
 H 3.62150 -2.16365 -2.12090

**10<sub>C-Ar</sub>**

SCF (BP86) Energy = -1703.75576952  
 Enthalpy 0K = -1702.826981  
 Enthalpy 298K = -1702.771327  
 Free Energy 298K = -1702.914878  
 Lowest Frequency = 6.7929 cm<sup>-1</sup>  
 Second Frequency = 10.8392 cm<sup>-1</sup>  
 SCF (BP86-D3BJ) Energy = -  
 1704.034853  
 SCF (FB) Energy = -1703.797932  
 SCF (DFB) Energy = -1703.804302  
 SCF (BS2) Energy = -2373.439885

Rh -1.50254 0.04525 -0.20774  
 P -1.48273 2.38226 0.04315  
 P -2.05428 -2.23378 -0.36000  
 N -3.58825 0.25777 0.32708  
 C -4.05395 1.44386 0.83505  
 C -5.40491 1.60363 1.18297  
 H -5.74758 2.56126 1.58421  
 C -6.29067 0.53105 1.02988  
 H -7.34440 0.63730 1.30497  
 C -5.80883 -0.67882 0.51723  
 H -6.47597 -1.53340 0.37547  
 C -4.45572 -0.79159 0.16000  
 C -3.06818 2.56402 1.06440  
 H -3.55285 3.54469 0.92011  
 H -2.73984 2.52979 2.11987  
 C -3.93645 -2.05708 -0.47838  
 H -4.46871 -2.93999 -0.08542  
 H -4.15726 -2.01466 -1.56123

C -1.83747 3.34720 -1.59462  
 C -3.17668 2.79791 -2.13967  
 H -4.03628 3.05475 -1.49774  
 H -3.36541 3.24539 -3.13229  
 H -3.14385 1.70172 -2.26394  
 C -1.94224 4.87350 -1.40720  
 H -0.97590 5.32926 -1.13915  
 H -2.26179 5.32921 -2.36230  
 H -2.68804 5.16103 -0.64634  
 C -0.72056 3.00392 -2.60655  
 H -0.64612 1.91520 -2.76155  
 H -0.95946 3.47566 -3.57707  
 H 0.26710 3.37367 -2.29146  
 C -0.16652 3.23763 1.16752  
 C 0.11399 2.23739 2.31332  
 H 0.47745 1.27117 1.92800  
 H 0.89119 2.66074 2.97471  
 H -0.77537 2.04544 2.93945  
 C 1.13060 3.45512 0.35803  
 H 1.01244 4.23096 -0.41581  
 H 1.92550 3.79891 1.04403  
 H 1.48384 2.52673 -0.12024  
 C -0.65138 4.57534 1.76963  
 H -1.55610 4.45986 2.38988  
 H 0.14122 4.96921 2.43150  
 H -0.85057 5.34204 1.00693  
 C -1.63123 -3.23946 -1.95507  
 C -1.73136 -2.23398 -3.12690  
 H -1.04941 -1.37917 -2.99283  
 H -1.46273 -2.75155 -4.06576  
 H -2.75263 -1.83494 -3.25810  
 C -0.18035 -3.76086 -1.85640  
 H -0.07671 -4.56297 -1.10784  
 H 0.11250 -4.18882 -2.83234  
 H 0.53287 -2.95623 -1.61303  
 C -2.60141 -4.41400 -2.21305  
 H -3.64618 -4.08360 -2.33814  
 H -2.30867 -4.91038 -3.15616  
 H -2.57224 -5.17586 -1.42050  
 C -1.75722 -3.22646 1.27201  
 C -2.52857 -2.47162 2.38019  
 H -3.62254 -2.51717 2.24548  
 H -2.29964 -2.94082 3.35412  
 H -2.22433 -1.41196 2.43637  
 C -2.23856 -4.68913 1.21033  
 H -1.63674 -5.29845 0.51763  
 H -2.13613 -5.14192 2.21355  
 H -3.30025 -4.77767 0.92249  
 C -0.24796 -3.16674 1.59906  
 H -0.07500 -3.63538 2.58485  
 H 0.36935 -3.70385 0.86322  
 H 0.10540 -2.12342 1.64623  
 C 0.23592 -0.12436 -0.75602  
 H 1.44905 -0.33754 -2.37325  
 C 1.45667 -0.24117 -1.27238  
 C 2.79108 -0.22793 -0.63383  
 C 3.92773 -0.06020 -1.45306  
 C 2.96626 -0.39356 0.75864  
 H 3.78323 0.06202 -2.53252  
 H 2.08194 -0.55187 1.38570  
 C 5.22703 -0.04668 -0.91249  
 C 4.25009 -0.39164 1.33513  
 C 5.36090 -0.21246 0.48170  
 H 6.36147 -0.21212 0.91561

C 6.44181 0.13938 -1.84874  
 C 6.31620 1.49871 -2.58754  
 C 6.46771 -1.01157 -2.88990  
 H 6.56236 -1.99253 -2.39373  
 H 5.55256 -1.03138 -3.50551  
 H 7.32678 -0.88921 -3.57248  
 H 5.39625 1.55491 -3.19372  
 H 7.17368 1.64407 -3.26763  
 H 6.30160 2.33866 -1.87201  
 C 4.40958 -0.60619 2.85821  
 C 3.82388 -1.99101 3.24306  
 C 3.64264 0.50480 3.62250  
 H 4.04054 1.50332 3.37240  
 H 2.56583 0.49785 3.38261  
 H 3.74379 0.36002 4.71251  
 H 2.75281 -2.06738 2.98916  
 H 3.92487 -2.16161 4.32940  
 H 4.35389 -2.80390 2.71824  
 C 7.78290 0.12808 -1.08245  
 H 7.84230 0.94407 -0.34160  
 H 7.95157 -0.82899 -0.55936  
 H 8.61513 0.26642 -1.79309  
 C 5.88657 -0.56641 3.30966  
 H 6.48555 -1.36099 2.83285  
 H 6.36022 0.40533 3.08769  
 H 5.94334 -0.72042 4.40058

**TS(B-10) 'c-Ar**

SCF (BP86) Energy = -1703.66028863  
 Enthalpy 0K = -1702.733191  
 Enthalpy 298K = -1702.678258  
 Free Energy 298K = -1702.816169  
 Lowest Frequency = -290.2984 cm<sup>-1</sup>  
 Second Frequency = 17.3842 cm<sup>-1</sup>  
 SCF (BP86-D3BJ) Energy = -  
 1703.949513  
 SCF (FB) Energy = -1703.699365  
 SCF (DFB) Energy = -1703.70501  
 SCF (BS2) Energy = -2373.342504

Rh 1.13582 -0.04828 -0.32868  
 P 1.79062 -2.26059 0.13328  
 P 1.07590 2.32745 -0.55239  
 N 3.11657 0.37210 0.25826  
 C 3.86790 -0.54930 0.95008  
 C 5.19131 -0.28332 1.33678  
 H 5.74345 -1.04657 1.89186  
 C 5.78112 0.94525 1.02441  
 H 6.80797 1.16877 1.32761  
 C 5.02639 1.87576 0.30148  
 H 5.45117 2.83957 0.00808  
 C 3.71305 1.56633 -0.08029  
 C 3.21925 -1.85349 1.30700  
 H 3.96778 -2.65932 1.38646  
 H 2.74218 -1.75804 2.30028  
 C 2.91556 2.50714 -0.93243  
 H 3.28828 3.53994 -0.84872  
 H 3.01848 2.19801 -1.98792  
 C 2.61843 -3.13721 -1.38528  
 C 3.71358 -2.18115 -1.91288  
 H 4.54808 -2.05761 -1.20222  
 H 4.13461 -2.60535 -2.84259  
 H 3.29921 -1.18542 -2.14577  
 C 3.26160 -4.49415 -1.03295

|   |          |          |          |
|---|----------|----------|----------|
| H | 2.51830  | -5.25410 | -0.74628 |
| H | 3.78971  | -4.87713 | -1.92556 |
| H | 4.01061  | -4.41326 | -0.22669 |
| C | 1.55734  | -3.32003 | -2.49380 |
| H | 1.11673  | -2.35410 | -2.78901 |
| H | 2.04642  | -3.75941 | -3.38276 |
| H | 0.73827  | -3.99029 | -2.19437 |
| C | 0.78462  | -3.51637 | 1.23051  |
| C | -0.06523 | -2.66242 | 2.19659  |
| H | -0.80944 | -2.06547 | 1.64999  |
| H | -0.60093 | -3.33645 | 2.89010  |
| H | 0.54879  | -1.98081 | 2.81224  |
| C | -0.15096 | -4.39800 | 0.37472  |
| H | 0.40607  | -5.11213 | -0.25330 |
| H | -0.78728 | -4.99423 | 1.05431  |
| H | -0.80152 | -3.78495 | -0.26607 |
| C | 1.72183  | -4.42688 | 2.06129  |
| H | 2.32142  | -3.86952 | 2.79907  |
| H | 1.09184  | -5.13218 | 2.63312  |
| H | 2.40256  | -5.02950 | 1.44211  |
| C | 0.29113  | 3.29142  | -2.05544 |
| C | 0.77257  | 2.56864  | -3.34049 |
| H | 0.68567  | 1.47060  | -3.28077 |
| H | 0.16410  | 2.91269  | -4.19586 |
| H | 1.82193  | 2.80569  | -3.58194 |
| C | -1.25523 | 3.25254  | -1.98970 |
| H | -1.65246 | 3.88140  | -1.18041 |
| H | -1.65925 | 3.64933  | -2.93868 |
| H | -1.66380 | 2.24108  | -1.84870 |
| C | 0.74459  | 4.76665  | -2.12299 |
| H | 1.84161  | 4.87702  | -2.13874 |
| H | 0.36159  | 5.21376  | -3.05884 |
| H | 0.34302  | 5.36764  | -1.29183 |
| C | 0.86330  | 3.31983  | 1.11757  |
| C | 1.21431  | 2.33931  | 2.26196  |
| H | 2.27887  | 2.05524  | 2.25051  |
| H | 1.01212  | 2.83384  | 3.23015  |
| H | 0.61997  | 1.41165  | 2.20872  |
| C | 1.79787  | 4.54480  | 1.21887  |
| H | 1.64736  | 5.27552  | 0.40984  |
| H | 1.59285  | 5.06573  | 2.17217  |
| H | 2.86151  | 4.25519  | 1.23717  |
| C | -0.60450 | 3.77137  | 1.27437  |
| H | -0.75885 | 4.13292  | 2.30745  |
| H | -0.85815 | 4.60549  | 0.60092  |
| H | -1.31836 | 2.94925  | 1.09734  |
| C | -0.67047 | -0.15053 | -1.43528 |
| H | -0.87088 | 0.42860  | -2.33279 |
| C | -0.61349 | -1.37917 | -0.90541 |
| C | -2.02931 | -0.50830 | -0.51316 |
| C | -3.17600 | -0.83929 | -1.28989 |
| C | -2.19051 | 0.03418  | 0.78862  |
| H | -3.01945 | -1.26791 | -2.28320 |
| H | -1.28431 | 0.27953  | 1.34943  |
| C | -4.46644 | -0.63565 | -0.78990 |
| C | -3.47556 | 0.18790  | 1.34576  |
| C | -4.58150 | -0.13419 | 0.53080  |
| H | -5.58619 | 0.00120  | 0.94446  |
| C | -5.73795 | -0.95642 | -1.60316 |
| C | -6.56866 | -2.03061 | -0.85072 |
| C | -5.40716 | -1.49477 | -3.01219 |
| H | -4.83349 | -0.76453 | -3.60941 |
| H | -4.83568 | -2.43829 | -2.97099 |
| H | -6.34308 | -1.70160 | -3.55715 |

|   |          |          |          |
|---|----------|----------|----------|
| H | -5.99431 | -2.96467 | -0.72901 |
| H | -7.48550 | -2.26454 | -1.41859 |
| H | -6.87734 | -1.68953 | 0.15160  |
| C | -3.71740 | 0.68003  | 2.79016  |
| C | -2.39906 | 0.88685  | 3.56601  |
| C | -4.56163 | -0.37525 | 3.55504  |
| H | -5.54722 | -0.53878 | 3.08902  |
| H | -4.04155 | -1.34737 | 3.59613  |
| H | -4.73767 | -0.03743 | 4.59084  |
| H | -1.81091 | -0.04517 | 3.63053  |
| H | -2.62383 | 1.20936  | 4.59647  |
| H | -1.76621 | 1.66626  | 3.10941  |
| C | -6.58223 | 0.33699  | -1.75715 |
| H | -6.02073 | 1.11741  | -2.29885 |
| H | -7.50271 | 0.12203  | -2.32659 |
| H | -6.88483 | 0.75287  | -0.78151 |
| C | -4.48867 | 2.02624  | 2.75263  |
| H | -3.90833 | 2.80496  | 2.22842  |
| H | -5.46051 | 1.92895  | 2.24051  |
| H | -4.68625 | 2.38076  | 3.77904  |

**TS(B-10) "c-Ar**

SCF (BP86) Energy = -1703.67908546

Enthalpy 0K = -1702.752845

Enthalpy 298K = -1702.697291

Free Energy 298K = -1702.837622

Lowest Frequency = -346.8243 cm<sup>-1</sup>

Second Frequency = 8.5270 cm<sup>-1</sup>

SCF (BP86-D3BJ) Energy = -

1703.967604

SCF (FB) Energy = -1703.718401

SCF (DFB) Energy = -1703.724061

SCF (BS2) Energy = -2373.362192

|    |          |          |          |
|----|----------|----------|----------|
| Rh | 1.23136  | -0.04824 | 0.12715  |
| P  | 1.26997  | -2.40092 | 0.07784  |
| P  | 1.88361  | 2.21093  | 0.12536  |
| N  | 3.21420  | -0.28825 | -0.68741 |
| C  | 3.82636  | -1.51785 | -0.72493 |
| C  | 5.08382  | -1.70888 | -1.31839 |
| H  | 5.52172  | -2.71094 | -1.32450 |
| C  | 5.76850  | -0.62154 | -1.87016 |
| H  | 6.75137  | -0.75134 | -2.33235 |
| C  | 5.16456  | 0.63786  | -1.80583 |
| H  | 5.66040  | 1.52127  | -2.21776 |
| C  | 3.89641  | 0.77870  | -1.22076 |
| C  | 3.13386  | -2.66136 | -0.04325 |
| H  | 3.39565  | -3.62340 | -0.51462 |
| H  | 3.49224  | -2.71048 | 1.00141  |
| C  | 3.22791  | 2.12355  | -1.19239 |
| H  | 3.97256  | 2.93256  | -1.10166 |
| H  | 2.70025  | 2.28222  | -2.15106 |
| C  | 0.60836  | -3.20991 | -1.55822 |
| C  | 1.37771  | -2.51817 | -2.70866 |
| H  | 2.44898  | -2.77905 | -2.72158 |
| H  | 0.94792  | -2.84797 | -3.67210 |
| H  | 1.28623  | -1.41933 | -2.65295 |
| C  | 0.80786  | -4.73510 | -1.64684 |
| H  | 0.17889  | -5.28170 | -0.92578 |
| H  | 0.51459  | -5.07686 | -2.65675 |
| H  | 1.85739  | -5.04026 | -1.49608 |
| C  | -0.88720 | -2.86294 | -1.70241 |
| H  | -1.06087 | -1.77687 | -1.62584 |
| H  | -1.24542 | -3.19829 | -2.69310 |

H -1.50599 -3.36661 -0.94318  
 C 0.89984 -3.47304 1.66241  
 C 1.38038 -2.62637 2.86541  
 H 0.87403 -1.64864 2.90213  
 H 1.15736 -3.17312 3.80023  
 H 2.46859 -2.44272 2.85011  
 C -0.61368 -3.72035 1.80893  
 H -1.02932 -4.31809 0.98148  
 H -0.79988 -4.28264 2.74230  
 H -1.16998 -2.77278 1.88152  
 C 1.64384 -4.82813 1.67212  
 H 2.73884 -4.71707 1.61751  
 H 1.42344 -5.33969 2.62710  
 H 1.32404 -5.49896 0.86182  
 C 0.79801 3.64881 -0.58646  
 C -0.04188 3.00296 -1.71427  
 H -0.63031 2.14154 -1.36130  
 H -0.73660 3.75751 -2.12721  
 H 0.58791 2.65559 -2.55200  
 C -0.12334 4.19602 0.52493  
 H 0.43376 4.80381 1.25637  
 H -0.89170 4.85138 0.07683  
 H -0.64054 3.39377 1.07620  
 C 1.61369 4.81553 -1.18942  
 H 2.24285 4.49981 -2.03741  
 H 0.90703 5.57008 -1.58161  
 H 2.25404 5.32114 -0.45222  
 C 2.82013 2.75640 1.73796  
 C 3.97029 1.74291 1.94460  
 H 4.74629 1.81823 1.16452  
 H 4.45812 1.95260 2.91408  
 H 3.59477 0.70583 1.96575  
 C 3.40716 4.18047 1.67059  
 H 2.62839 4.95912 1.64846  
 H 4.01693 4.35834 2.57558  
 H 4.07125 4.32545 0.80142  
 C 1.85031 2.63528 2.93499  
 H 2.40079 2.84949 3.86944  
 H 1.00930 3.34342 2.87635  
 H 1.44254 1.61289 3.00693  
 C -0.64007 0.18912 0.87038  
 C -0.93863 0.35495 2.11111  
 H -1.24538 0.52464 3.13321  
 C -2.15992 0.23062 0.45981  
 C -2.78695 1.46862 0.16960  
 C -2.92855 -0.96029 0.44087  
 H -2.20270 2.38526 0.24544  
 H -2.44603 -1.89980 0.70805  
 C -4.13978 1.52178 -0.21204  
 C -4.28703 -0.93964 0.07943  
 C -4.85701 0.30761 -0.25466  
 H -5.91393 0.33753 -0.53823  
 C -5.17151 -2.20568 0.06010  
 C -4.40787 -3.46586 0.51978  
 C -5.68952 -2.44337 -1.38362  
 H -6.28219 -1.59022 -1.75366  
 H -4.85322 -2.60274 -2.08560  
 H -6.33659 -3.33706 -1.41313  
 H -3.56274 -3.70230 -0.14977  
 H -5.08685 -4.33473 0.50729  
 H -4.02210 -3.36266 1.54892  
 C -4.86538 2.84186 -0.55226  
 C -5.38744 2.77340 -2.01257  
 C -3.94056 4.07064 -0.42419

H -3.55600 4.19249 0.60349  
 H -3.08167 4.00997 -1.11496  
 H -4.50319 4.98500 -0.67610  
 H -4.55633 2.64518 -2.72702  
 H -5.91920 3.70586 -2.26944  
 H -6.09126 1.93753 -2.16041  
 C -6.06300 3.03436 0.41686  
 H -6.79345 2.21191 0.34219  
 H -5.72230 3.08984 1.46487  
 H -6.59414 3.97241 0.18006  
 C -6.37883 -2.00190 1.01524  
 H -7.00444 -1.14426 0.71794  
 H -7.02158 -2.89905 1.00760  
 H -6.04212 -1.83173 2.05212

**TS (10-F)<sub>C-Ar</sub>**

SCF (BP86) Energy = -1703.65895427  
 Enthalpy 0K = -1702.732549  
 Enthalpy 298K = -1702.677166  
 Free Energy 298K = -1702.815332  
 Lowest Frequency = -296.5141 cm<sup>-1</sup>  
 Second Frequency = 18.3772 cm<sup>-1</sup>  
 SCF (BP86-D3BJ) Energy = -  
 1703.960357  
 SCF (FB) Energy = -1703.700005  
 SCF (DFB) Energy = -1703.706172  
 SCF (BS2) Energy = -2373.344556

Rh 0.73740 0.24221 -0.26323  
 P 2.45130 -1.42146 -0.51146  
 P -0.18807 2.43137 0.04324  
 N 2.12313 0.93237 1.21356  
 C 2.97391 0.04245 1.82094  
 C 3.81288 0.44092 2.87363  
 H 4.46174 -0.29935 3.34935  
 C 3.81594 1.77639 3.29316  
 H 4.45928 2.10017 4.11672  
 C 3.00734 2.69552 2.61560  
 H 3.01921 3.75675 2.87796  
 C 2.18078 2.25443 1.57008  
 C 3.01785 -1.36806 1.29444  
 C 1.38766 3.21726 0.73789  
 C 3.94323 -0.71779 -1.56261  
 C 4.31907 0.68116 -1.02231  
 H 4.72299 0.65385 0.00311  
 H 5.10792 1.09892 -1.67383  
 H 3.45932 1.37040 -1.04924  
 C 5.19622 -1.61658 -1.49546  
 H 5.04912 -2.59216 -1.98257  
 H 6.01910 -1.10962 -2.03196  
 H 5.54333 -1.78738 -0.46190  
 C 3.48175 -0.54042 -3.02735  
 H 2.57904 0.08705 -3.09135  
 H 4.29331 -0.04360 -3.58995  
 H 3.26803 -1.49397 -3.52994  
 C 2.26975 -3.34115 -0.83332  
 C 0.89918 -3.77673 -0.27850  
 H 0.06481 -3.26616 -0.78146  
 H 0.78625 -4.86422 -0.44167  
 H 0.81471 -3.60710 0.80809  
 C 2.29723 -3.65131 -2.34582  
 H 3.28853 -3.49214 -2.79695  
 H 2.04733 -4.71911 -2.48345  
 H 1.55161 -3.05627 -2.89651

C 3.37007 -4.14823 -0.10463  
 H 3.30027 -4.05920 0.99204  
 H 3.22528 -5.21709 -0.34631  
 H 4.39085 -3.88078 -0.41258  
 C -0.49637 3.55007 -1.51891  
 C 0.43707 3.00461 -2.62405  
 H 0.21246 1.95642 -2.87420  
 H 0.30884 3.62218 -3.53224  
 H 1.50267 3.06340 -2.33934  
 C -1.96225 3.41960 -1.98018  
 H -2.66679 3.89393 -1.27818  
 H -2.07836 3.92777 -2.95457  
 H -2.26053 2.36840 -2.11519  
 C -0.16590 5.04050 -1.27322  
 H 0.89511 5.20739 -1.02553  
 H -0.36345 5.59505 -2.20881  
 H -0.78301 5.49834 -0.48678  
 C -1.46011 2.78797 1.47629  
 C -0.85463 2.16090 2.75410  
 H 0.04815 2.68843 3.10367  
 H -1.60256 2.22477 3.56532  
 H -0.60860 1.09544 2.60728  
 C -1.70294 4.29437 1.70658  
 H -2.26489 4.75770 0.88025  
 H -2.31451 4.41436 2.61978  
 H -0.77516 4.86968 1.86502  
 C -2.80549 2.09104 1.19069  
 H -3.49849 2.32047 2.02126  
 H -3.27913 2.44090 0.26151  
 H -2.69937 0.99840 1.13355  
 C 0.00135 -0.53272 -1.91539  
 H -0.24083 -1.24227 -4.10812  
 C -0.08289 -0.92275 -3.09382  
 C -1.25007 -0.69096 -0.49890  
 C -2.45750 -0.35556 -1.14495  
 C -1.29112 -1.50705 0.65646  
 H -2.42268 0.23301 -2.06382  
 H -0.36523 -1.77886 1.16398  
 C -3.69523 -0.86214 -0.69119  
 C -2.52235 -1.94238 1.19372  
 C -3.70334 -1.63179 0.48646  
 H -4.65389 -2.01739 0.86254  
 C -4.97536 -0.60746 -1.52314  
 C -4.79935 -1.26376 -2.91924  
 C -5.21321 0.91378 -1.70031  
 H -5.36419 1.40998 -0.72632  
 H -4.37058 1.40832 -2.21204  
 H -6.11563 1.08792 -2.31167  
 H -3.94020 -0.83991 -3.46632  
 H -5.70220 -1.10201 -3.53372  
 H -4.63843 -2.35135 -2.82740  
 C -2.61279 -2.76519 2.49953  
 C -1.24239 -2.94409 3.18897  
 C -3.18500 -4.17209 2.17794  
 H -4.18919 -4.11168 1.72701  
 H -2.53195 -4.71512 1.47351  
 H -3.26764 -4.77186 3.10117  
 H -0.53860 -3.52316 2.56563  
 H -1.37257 -3.50130 4.13191  
 H -0.77700 -1.97385 3.43846  
 C -6.23248 -1.21338 -0.85926  
 H -6.15776 -2.30929 -0.75512  
 H -6.42299 -0.78037 0.13805  
 H -7.11593 -1.00299 -1.48506

C -3.55643 -2.04244 3.49802  
 H -3.17027 -1.04116 3.75579  
 H -4.57269 -1.91726 3.09026  
 H -3.64172 -2.62634 4.43098  
 H 2.29132 -2.00371 1.83522  
 H 4.01667 -1.80543 1.45937  
 H 1.18740 4.15234 1.28522  
 H 1.99440 3.48522 -0.14758

**F<sub>C-Ar</sub>**

SCF (BP86) Energy = -1703.70149825  
 Enthalpy 0K = -1702.773932  
 Enthalpy 298K = -1702.718073  
 Free Energy 298K = -1702.857447  
 Lowest Frequency = 18.5143 cm<sup>-1</sup>  
 Second Frequency = 25.5712 cm<sup>-1</sup>  
 SCF (BP86-D3BJ) Energy = -  
 1704.007772  
 SCF (FB) Energy = -1703.744948  
 SCF (DFB) Energy = -1703.751885  
 SCF (BS2) Energy = -2373.387231

Rh 0.93141 0.06133 -0.40716  
 P 1.20903 -2.30275 -0.42398  
 P 1.25162 2.40161 0.04118  
 N 1.38449 -0.16731 1.68931  
 C 1.31744 -1.41015 2.27046  
 C 1.60508 -1.59291 3.63174  
 H 1.53943 -2.59458 4.06522  
 C 1.95349 -0.48984 4.42117  
 H 2.16113 -0.61238 5.48831  
 C 2.04903 0.76768 3.81671  
 H 2.35046 1.64616 4.39401  
 C 1.78514 0.90333 2.44282  
 C 0.88185 -2.57663 1.41613  
 C 2.05156 2.21948 1.75111  
 C 3.09269 -2.71270 -0.68930  
 C 3.89554 -1.84981 0.31280  
 H 3.69446 -2.11442 1.36382  
 H 4.97312 -2.01460 0.13180  
 H 3.70164 -0.77148 0.18201  
 C 3.43031 -4.19728 -0.44223  
 H 2.98334 -4.86211 -1.19700  
 H 4.52666 -4.32364 -0.50909  
 H 3.12553 -4.54541 0.55943  
 C 3.50352 -2.30547 -2.12375  
 H 3.19914 -1.27516 -2.36905  
 H 4.60350 -2.37240 -2.20740  
 H 3.07432 -2.96762 -2.88916  
 C 0.07194 -3.61884 -1.27990  
 C -1.36605 -3.05921 -1.28856  
 H -1.44514 -2.15021 -1.90063  
 H -2.03004 -3.82927 -1.72208  
 H -1.74716 -2.82228 -0.28137  
 C 0.52527 -3.82111 -2.74259  
 H 1.48117 -4.36285 -2.81989  
 H -0.23570 -4.43241 -3.26048  
 H 0.60968 -2.86241 -3.28085  
 C 0.08028 -4.96357 -0.51665  
 H -0.33729 -4.87140 0.49973  
 H -0.56860 -5.67083 -1.06451  
 H 1.07642 -5.42343 -0.44505  
 C 2.72037 3.11541 -1.01292  
 C 3.68390 1.92613 -1.24102

|   |          |          |          |
|---|----------|----------|----------|
| H | 3.19366  | 1.10905  | -1.79693 |
| H | 4.54188  | 2.27084  | -1.84722 |
| H | 4.10079  | 1.53024  | -0.29715 |
| C | 2.17600  | 3.59188  | -2.37714 |
| H | 1.57124  | 4.50836  | -2.28422 |
| H | 3.03055  | 3.83297  | -3.03544 |
| H | 1.57844  | 2.80946  | -2.87364 |
| C | 3.50340  | 4.25585  | -0.32451 |
| H | 3.93361  | 3.96213  | 0.64805  |
| H | 4.35396  | 4.52759  | -0.97610 |
| H | 2.90509  | 5.16484  | -0.17563 |
| C | -0.15490 | 3.70604  | 0.31690  |
| C | -0.99550 | 3.22548  | 1.52192  |
| H | -0.42965 | 3.24253  | 2.46896  |
| H | -1.84739 | 3.91864  | 1.64527  |
| H | -1.40477 | 2.21545  | 1.37044  |
| C | 0.39241  | 5.11711  | 0.61676  |
| H | 0.87124  | 5.57757  | -0.26120 |
| H | -0.45848 | 5.76411  | 0.89826  |
| H | 1.10487  | 5.13681  | 1.45928  |
| C | -1.04603 | 3.74293  | -0.94307 |
| H | -1.87233 | 4.45614  | -0.76944 |
| H | -0.50123 | 4.08050  | -1.83777 |
| H | -1.48835 | 2.75777  | -1.15275 |
| C | 0.82062  | 0.18538  | -2.36174 |
| H | 0.89603  | 0.27019  | -4.67208 |
| C | 0.85604  | 0.21627  | -3.59877 |
| C | -1.10875 | 0.03579  | -0.13567 |
| C | -1.96803 | 0.30113  | -1.21428 |
| C | -1.64993 | -0.27583 | 1.12986  |
| H | -1.54898 | 0.53394  | -2.19368 |
| H | -1.00126 | -0.43606 | 1.98996  |
| C | -3.37605 | 0.22586  | -1.05557 |
| C | -3.04907 | -0.35027 | 1.31815  |
| C | -3.88777 | -0.10304 | 0.21018  |
| H | -4.96998 | -0.16626 | 0.34760  |
| C | -4.28265 | 0.48492  | -2.28232 |
| C | -3.95765 | -0.55339 | -3.38908 |
| C | -4.02309 | 1.91230  | -2.83108 |
| H | -4.25225 | 2.67828  | -2.07049 |
| H | -2.97552 | 2.04669  | -3.14926 |
| H | -4.66396 | 2.10369  | -3.70934 |
| H | -2.90593 | -0.49000 | -3.71602 |
| H | -4.59405 | -0.37776 | -4.27394 |
| H | -4.14517 | -1.58163 | -3.03501 |
| C | -3.67713 | -0.68433 | 2.69142  |
| C | -2.61857 | -0.92185 | 3.79016  |
| C | -4.53587 | -1.97107 | 2.56102  |
| H | -5.34164 | -1.85459 | 1.81807  |
| H | -3.91767 | -2.83277 | 2.25443  |
| H | -5.00618 | -2.21611 | 3.52930  |
| H | -1.95768 | -1.77418 | 3.55075  |
| H | -3.12076 | -1.15603 | 4.74383  |
| H | -1.98984 | -0.03003 | 3.95920  |
| C | -5.78324 | 0.36668  | -1.93283 |
| H | -6.04522 | -0.64289 | -1.57208 |
| H | -6.08789 | 1.10039  | -1.16668 |
| H | -6.38757 | 0.56106  | -2.83475 |
| C | -4.58260 | 0.49368  | 3.14130  |
| H | -3.99800 | 1.42280  | 3.25483  |
| H | -5.39027 | 0.69020  | 2.41754  |
| H | -5.05247 | 0.26449  | 4.11368  |
| H | -0.22000 | -2.66964 | 1.47745  |
| H | 1.30971  | -3.51923 | 1.79530  |

|   |         |         |         |
|---|---------|---------|---------|
| H | 1.79203 | 3.06607 | 2.40802 |
| H | 3.14274 | 2.28921 | 1.58588 |

**B<sub>0-Ar</sub>**

SCF (BP86) Energy = -1775.61055155  
 Enthalpy 0K = -1774.729112  
 Enthalpy 298K = -1774.673594  
 Free Energy 298K = -1774.815429  
 Lowest Frequency = 12.5151 cm<sup>-1</sup>  
 Second Frequency = 16.2450 cm<sup>-1</sup>  
 SCF (BP86-D3BJ) Energy = -  
 1775.883185  
 SCF (FB) Energy = -1775.649205  
 SCF (DFB) Energy = -1775.6546  
 SCF (BS2) Energy = -2445.323999

|    |          |          |          |
|----|----------|----------|----------|
| Rh | -1.18940 | 0.14644  | -0.34431 |
| P  | -0.81360 | 2.40023  | 0.16598  |
| P  | -2.18416 | -1.94705 | -0.54915 |
| N  | -2.90677 | 0.49964  | 0.79166  |
| C  | -3.15805 | 1.74026  | 1.32220  |
| C  | -4.30460 | 2.01513  | 2.08277  |
| H  | -4.44963 | 3.01974  | 2.48235  |
| C  | -5.22193 | 0.98009  | 2.29384  |
| H  | -6.12409 | 1.16658  | 2.88379  |
| C  | -4.99897 | -0.29017 | 1.74954  |
| H  | -5.69663 | -1.11794 | 1.88370  |
| C  | -3.83351 | -0.49190 | 0.99675  |
| O  | -2.27568 | 2.73354  | 1.10976  |
| O  | -3.62391 | -1.70490 | 0.44861  |
| C  | -1.09170 | 3.65691  | -1.26093 |
| C  | -2.40693 | 3.21283  | -1.94490 |
| H  | -3.27965 | 3.35085  | -1.28598 |
| H  | -2.56431 | 3.83407  | -2.84503 |
| H  | -2.36750 | 2.15543  | -2.25851 |
| C  | -1.22038 | 5.11907  | -0.79154 |
| H  | -0.26132 | 5.52948  | -0.43870 |
| H  | -1.54015 | 5.73600  | -1.65104 |
| H  | -1.97399 | 5.23861  | 0.00308  |
| C  | 0.08284  | 3.50466  | -2.25465 |
| H  | 0.21018  | 2.46098  | -2.58719 |
| H  | -0.12909 | 4.12107  | -3.14687 |
| H  | 1.03908  | 3.85355  | -1.83408 |
| C  | 0.44982  | 2.97853  | 1.49806  |
| C  | 0.48952  | 1.81805  | 2.52007  |
| H  | 0.80594  | 0.87175  | 2.05312  |
| H  | 1.21778  | 2.06760  | 3.31257  |
| H  | -0.48908 | 1.66470  | 3.00601  |
| C  | 1.83378  | 3.14778  | 0.83501  |
| H  | 1.87070  | 4.03005  | 0.17546  |
| H  | 2.58684  | 3.30333  | 1.62842  |
| H  | 2.14388  | 2.25894  | 0.26044  |
| C  | 0.03017  | 4.27404  | 2.22453  |
| H  | -0.98189 | 4.20007  | 2.65095  |
| H  | 0.73538  | 4.44144  | 3.05885  |
| H  | 0.07390  | 5.16106  | 1.57696  |
| C  | -3.07661 | -2.43872 | -2.18303 |
| C  | -3.59207 | -1.10504 | -2.77618 |
| H  | -2.77923 | -0.38117 | -2.94896 |
| H  | -4.08313 | -1.31231 | -3.74414 |
| H  | -4.34021 | -0.62840 | -2.12059 |
| C  | -2.04148 | -3.07873 | -3.13524 |
| H  | -1.74944 | -4.09006 | -2.80945 |
| H  | -2.49331 | -3.17683 | -4.13869 |



H -1.12638 -2.47149 -3.24217  
 C -4.27820 -3.38348 -1.96875  
 H -4.99934 -2.97337 -1.24507  
 H -4.80132 -3.50149 -2.93505  
 H -3.97881 -4.38642 -1.63365  
 C -1.42438 -3.42569 0.40943  
 C -1.17717 -2.88777 1.83950  
 H -2.12175 -2.70340 2.37633  
 H -0.60730 -3.64330 2.40956  
 H -0.59344 -1.95040 1.83126  
 C -2.33599 -4.66654 0.47631  
 H -2.41831 -5.17613 -0.49661  
 H -1.89073 -5.38992 1.18352  
 H -3.34715 -4.42436 0.84034  
 C -0.07568 -3.77697 -0.25940  
 H 0.42818 -4.54779 0.35116  
 H -0.20247 -4.19436 -1.27067  
 H 0.60003 -2.90909 -0.32485  
 C -0.01590 -0.06820 -2.06875  
 H -0.32720 -0.13315 -3.10586  
 C 0.83372 -0.25139 -1.13643  
 C 2.15891 -0.39831 -0.58191  
 C 3.26054 0.00501 -1.37959  
 C 2.39523 -0.96003 0.69424  
 H 3.05950 0.43786 -2.36432  
 H 1.53435 -1.27082 1.29387  
 C 4.58098 -0.15337 -0.92487  
 C 3.70595 -1.13905 1.17747  
 C 4.77376 -0.72485 0.35287  
 H 5.79414 -0.85463 0.71577  
 C 3.93632 -1.79292 2.55891  
 C 3.36447 -3.23595 2.53620  
 C 3.20857 -0.97061 3.65469  
 H 3.59665 0.06135 3.69961  
 H 2.12071 -0.91845 3.47831  
 H 3.36244 -1.43513 4.64412  
 H 2.28254 -3.24312 2.31954  
 H 3.51410 -3.72153 3.51626  
 H 3.86766 -3.84991 1.77003  
 C 5.75738 0.28516 -1.82570  
 C 5.62333 1.79749 -2.14782  
 C 5.71551 -0.52874 -3.14701  
 H 5.81359 -1.60993 -2.95053  
 H 4.77428 -0.36933 -3.69975  
 H 6.54634 -0.22482 -3.80707  
 H 4.68051 2.02594 -2.67310  
 H 6.45341 2.12199 -2.79886  
 H 5.65608 2.40436 -1.22673  
 C 5.43341 -1.87247 2.93173  
 H 6.00616 -2.48759 2.21678  
 H 5.90031 -0.87379 2.98347  
 H 5.54097 -2.33882 3.92536  
 C 7.12955 0.05288 -1.15533  
 H 7.23465 0.62530 -0.21745  
 H 7.30716 -1.01368 -0.93431  
 H 7.93177 0.38494 -1.83533

**TS (B-10)<sub>o-Ar</sub>**

SCF (BP86) Energy = -1775.54175745  
 Enthalpy 0K = -1774.663837  
 Enthalpy 298K = -1774.608648  
 Free Energy 298K = -1774.750311  
 Lowest Frequency = -691.6370 cm<sup>-1</sup>  
 Second Frequency = 12.7050 cm<sup>-1</sup>

SCF (BP86-D3BJ) Energy = -  
 1775.813016  
 SCF (FB) Energy = -1775.58062  
 SCF (DFB) Energy = -1775.586143  
 SCF (BS2) Energy = -2445.254441

Rh 1.22629 0.15325 -0.31561  
 P 2.43428 -1.82378 -0.52638  
 P 0.61078 2.33554 0.22987  
 N 2.90990 0.68203 0.79354  
 C 3.93510 -0.20779 0.99595  
 C 5.08963 0.12024 1.71956  
 H 5.86769 -0.63318 1.84967  
 C 5.19861 1.41528 2.23965  
 H 6.09058 1.70064 2.80484  
 C 4.17666 2.34838 2.03547  
 H 4.22643 3.36836 2.41906  
 C 3.04731 1.94748 1.30620  
 O 3.83243 -1.44999 0.47892  
 O 2.06014 2.84095 1.10924  
 C 3.35590 -2.14685 -2.18522  
 C 3.72950 -0.73923 -2.71039  
 H 4.43307 -0.22199 -2.03620  
 H 4.23238 -0.85240 -3.68798  
 H 2.83790 -0.10670 -2.84997  
 C 4.63905 -2.98686 -2.01540  
 H 4.43349 -4.03569 -1.75802  
 H 5.18058 -2.98507 -2.97855  
 H 5.31138 -2.56335 -1.25318  
 C 2.38014 -2.82175 -3.17388  
 H 1.44909 -2.24228 -3.30047  
 H 2.86454 -2.87206 -4.16565  
 H 2.13117 -3.85497 -2.88169  
 C 1.84644 -3.40339 0.39264  
 C 1.54554 -2.93724 1.83722  
 H 0.85528 -2.07537 1.85412  
 H 1.07241 -3.76997 2.38795  
 H 2.46486 -2.65650 2.37561  
 C 0.53922 -3.89022 -0.27403  
 H 0.68622 -4.21821 -1.31546  
 H 0.15936 -4.76089 0.29043  
 H -0.25015 -3.12005 -0.25349  
 C 2.89204 -4.53573 0.41756  
 H 3.87388 -4.18970 0.77764  
 H 2.54093 -5.32238 1.11001  
 H 3.01994 -5.00675 -0.56960  
 C 0.66449 3.62523 -1.19354  
 C 2.01987 3.39841 -1.90483  
 H 2.13560 2.35228 -2.23549  
 H 2.05821 4.04403 -2.80062  
 H 2.87275 3.66670 -1.26069  
 C -0.48410 3.29335 -2.17257  
 H -1.48087 3.42331 -1.72158  
 H -0.41878 3.98186 -3.03427  
 H -0.40125 2.26550 -2.56861  
 C 0.56588 5.08486 -0.70858  
 H 1.31835 5.32027 0.06096  
 H 0.74947 5.75281 -1.56959  
 H -0.43451 5.32971 -0.31747  
 C -0.66204 2.74537 1.61814  
 C -0.58645 1.54637 2.59276  
 H 0.41282 1.45197 3.05057  
 H -1.31188 1.70861 3.41072  
 H -0.83399 0.59556 2.09440

C -0.32178 4.03962 2.38838  
 H -0.42825 4.94466 1.77405  
 H -1.02928 4.12939 3.23267  
 H 0.69674 4.01715 2.80439  
 C -2.07372 2.83919 1.00037  
 H -2.81124 2.91510 1.81962  
 H -2.19171 3.73800 0.37323  
 H -2.33889 1.95086 0.40330  
 C 0.11422 -0.04088 -2.07678  
 H -0.36273 -1.37014 -1.85348  
 C -0.75236 -0.46240 -1.14434  
 C -2.12509 -0.58816 -0.63703  
 C -2.38721 -1.21961 0.59761  
 C -3.18750 -0.10129 -1.43491  
 H -1.54273 -1.58581 1.18678  
 H -2.95067 0.37284 -2.39001  
 C -3.70893 -1.37084 1.05725  
 C -4.51957 -0.23483 -1.00371  
 C -4.74342 -0.86910 0.23847  
 H -5.77700 -0.98144 0.58255  
 C -4.05493 -2.06146 2.39387  
 C -4.81989 -1.06531 3.30569  
 C -2.79468 -2.53970 3.14760  
 H -2.22131 -3.28045 2.56333  
 H -2.12342 -1.70134 3.40443  
 H -3.09093 -3.02467 4.09257  
 H -4.20249 -0.17948 3.53358  
 H -5.08471 -1.55139 4.26044  
 H -5.75597 -0.71420 2.84072  
 C -5.71680 0.27059 -1.83738  
 C -5.26996 0.93494 -3.15813  
 C -6.51486 1.31338 -1.00991  
 H -6.89949 0.88847 -0.06776  
 H -5.88810 2.18581 -0.75732  
 H -7.38164 1.67332 -1.59039  
 H -4.62991 1.81714 -2.98185  
 H -6.15660 1.27909 -3.71597  
 H -4.72374 0.23228 -3.81105  
 C -4.95250 -3.29649 2.11205  
 H -4.43391 -4.02735 1.46836  
 H -5.21379 -3.79925 3.05915  
 H -5.89496 -3.01667 1.61294  
 C -6.63824 -0.93057 -2.18181  
 H -6.09968 -1.68777 -2.77658  
 H -7.02834 -1.42549 -1.27686  
 H -7.50439 -0.58521 -2.77204

**TS (B-C)<sub>o-Ar</sub>**

SCF (BP86) Energy = -1775.54175745  
 Enthalpy 0K = -1774.663837  
 Enthalpy 298K = -1774.608648  
 Free Energy 298K = -1774.750311  
 Lowest Frequency = -691.6370 cm<sup>-1</sup>  
 Second Frequency = 12.7050 cm<sup>-1</sup>  
 SCF (BP86-D3BJ) Energy = -  
 1775.859728  
 SCF (FB) Energy = -1775.635557  
 SCF (DFB) Energy = -1775.64073  
 SCF (BS2) Energy = -2445.311889

Rh 1.22629 0.15325 -0.31561  
 P 2.43428 -1.82378 -0.52638  
 P 0.61078 2.33554 0.22987  
 N 2.90990 0.68203 0.79354

C 3.93510 -0.20779 0.99595  
 C 5.08963 0.12024 1.71956  
 H 5.86769 -0.63318 1.84967  
 C 5.19861 1.41528 2.23965  
 H 6.09058 1.70064 2.80484  
 C 4.17666 2.34838 2.03547  
 H 4.22643 3.36836 2.41906  
 C 3.04731 1.94748 1.30620  
 O 3.83243 -1.44999 0.47892  
 O 2.06014 2.84095 1.10924  
 C 3.35590 -2.14685 -2.18522  
 C 3.72950 -0.73923 -2.71039  
 H 4.43307 -0.22199 -2.03620  
 H 4.23238 -0.85240 -3.68798  
 H 2.83790 -0.10670 -2.84997  
 C 4.63905 -2.98686 -2.01540  
 H 4.43349 -4.03569 -1.75802  
 H 5.18058 -2.98507 -2.97855  
 H 5.31138 -2.56335 -1.25318  
 C 2.38014 -2.82175 -3.17388  
 H 1.44909 -2.24228 -3.30047  
 H 2.86454 -2.87206 -4.16565  
 H 2.13117 -3.85497 -2.88169  
 C 1.84644 -3.40339 0.39264  
 C 1.54554 -2.93724 1.83722  
 H 0.85528 -2.07537 1.85412  
 H 1.07241 -3.76997 2.38795  
 H 2.46486 -2.65650 2.37561  
 C 0.53922 -3.89022 -0.27403  
 H 0.68622 -4.21821 -1.31546  
 H 0.15936 -4.76089 0.29043  
 H -0.25015 -3.12005 -0.25349  
 C 2.89204 -4.53573 0.41756  
 H 3.87388 -4.18970 0.77764  
 H 2.54093 -5.32238 1.11001  
 H 3.01994 -5.00675 -0.56960  
 C 0.66449 3.62523 -1.19354  
 C 2.01987 3.39841 -1.90483  
 H 2.13560 2.35228 -2.23549  
 H 2.05821 4.04403 -2.80062  
 H 2.87275 3.66670 -1.26069  
 C -0.48410 3.29335 -2.17257  
 H -1.48087 3.42331 -1.72158  
 H -0.41878 3.98186 -3.03427  
 H -0.40125 2.26550 -2.56861  
 C 0.56588 5.08486 -0.70858  
 H 1.31835 5.32027 0.06096  
 H 0.74947 5.75281 -1.56959  
 H -0.43451 5.32971 -0.31747  
 C -0.66204 2.74537 1.61814  
 C -0.58645 1.54637 2.59276  
 H 0.41282 1.45197 3.05057  
 H -1.31188 1.70861 3.41072  
 H -0.83399 0.59556 2.09440  
 C -0.32178 4.03962 2.38838  
 H -0.42825 4.94466 1.77405  
 H -1.02928 4.12939 3.23267  
 H 0.69674 4.01715 2.80439  
 C -2.07372 2.83919 1.00037  
 H -2.81124 2.91510 1.81962  
 H -2.19171 3.73800 0.37323  
 H -2.33889 1.95086 0.40330  
 C 0.11422 -0.04088 -2.07678  
 H -0.36273 -1.37014 -1.85348

C -0.75236 -0.46240 -1.14434  
 C -2.12509 -0.58816 -0.63703  
 C -2.38721 -1.21961 0.59761  
 C -3.18750 -0.10129 -1.43491  
 H -1.54273 -1.58581 1.18678  
 H -2.95067 0.37284 -2.39001  
 C -3.70893 -1.37084 1.05725  
 C -4.51957 -0.23483 -1.00371  
 C -4.74342 -0.86910 0.23847  
 H -5.77700 -0.98144 0.58255  
 C -4.05493 -2.06146 2.39387  
 C -4.81989 -1.06531 3.30569  
 C -2.79468 -2.53970 3.14760  
 H -2.22131 -3.28045 2.56333  
 H -2.12342 -1.70134 3.40443  
 H -3.09093 -3.02467 4.09257  
 H -4.20249 -0.17948 3.53358  
 H -5.08471 -1.55139 4.26044  
 H -5.75597 -0.71420 2.84072  
 C -5.71680 0.27059 -1.83738  
 C -5.26996 0.93494 -3.15813  
 C -6.51486 1.31338 -1.00991  
 H -6.89949 0.88847 -0.06776  
 H -5.88810 2.18581 -0.75732  
 H -7.38164 1.67332 -1.59039  
 H -4.62991 1.81714 -2.98185  
 H -6.15660 1.27909 -3.71597  
 H -4.72374 0.23228 -3.81105  
 C -4.95250 -3.29649 2.11205  
 H -4.43391 -4.02735 1.46836  
 H -5.21379 -3.79925 3.05915  
 H -5.89496 -3.01667 1.61294  
 C -6.63824 -0.93057 -2.18181  
 H -6.09968 -1.68777 -2.77658  
 H -7.02834 -1.42549 -1.27686  
 H -7.50439 -0.58521 -2.77204

**Co-Ar**

SCF (BP86) Energy = -1775.60148460  
 Enthalpy 0K = -1774.721821  
 Enthalpy 298K = -1774.666087  
 Free Energy 298K = -1774.811699  
 Lowest Frequency = 7.1135 cm<sup>-1</sup>  
 Second Frequency = 12.7580 cm<sup>-1</sup>  
 SCF (BP86-D3BJ) Energy = -  
 1775.860315  
 SCF (FB) Energy = -1775.639365  
 SCF (DFB) Energy = -1775.644736  
 SCF (BS2) Energy = -2445.317225

Rh -1.60177 -0.00223 0.13226  
 P -1.92050 -2.28748 0.03517  
 P -1.93614 2.28367 0.08770  
 N -3.64453 -0.00355 -0.21871  
 C -4.32615 -1.18036 -0.40293  
 C -5.70242 -1.21878 -0.66584  
 H -6.19192 -2.18455 -0.79901  
 C -6.39554 -0.00507 -0.74522  
 H -7.46998 -0.00577 -0.94992  
 C -5.72294 1.20963 -0.56605  
 H -6.22849 2.17474 -0.62113  
 C -4.34637 1.17286 -0.30485  
 O -3.64735 -2.34559 -0.32612  
 O -3.68839 2.33831 -0.12152

C -1.90770 -3.28849 1.67153  
 C -2.87578 -2.53731 2.61675  
 H -3.92148 -2.61288 2.27811  
 H -2.81241 -2.99295 3.62112  
 H -2.61224 -1.46921 2.70850  
 C -2.36555 -4.75087 1.50741  
 H -1.63297 -5.35750 0.95165  
 H -2.46818 -5.20324 2.51043  
 H -3.34420 -4.82662 1.00695  
 C -0.47565 -3.22544 2.25102  
 H -0.13153 -2.18802 2.39670  
 H -0.47536 -3.71791 3.23993  
 H 0.26172 -3.74909 1.62248  
 C -1.27413 -3.23655 -1.50163  
 C -1.33180 -2.20521 -2.65475  
 H -0.72728 -1.30984 -2.43183  
 H -0.93221 -2.67504 -3.57177  
 H -2.36606 -1.88685 -2.86919  
 C 0.19463 -3.63421 -1.23582  
 H 0.27968 -4.43601 -0.48403  
 H 0.63228 -4.01839 -2.17475  
 H 0.80441 -2.77245 -0.91316  
 C -2.12845 -4.46646 -1.87178  
 H -3.18986 -4.20411 -2.00208  
 H -1.76038 -4.86679 -2.83378  
 H -2.05681 -5.27550 -1.13078  
 C -1.81549 3.29424 1.71249  
 C -2.38390 2.36064 2.80892  
 H -1.83478 1.40577 2.86595  
 H -2.29535 2.86926 3.78579  
 H -3.45068 2.13618 2.64389  
 C -0.32204 3.57596 1.99078  
 H 0.09638 4.32306 1.29725  
 H -0.22222 3.98499 3.01209  
 H 0.29641 2.66291 1.93834  
 C -2.63284 4.60236 1.68727  
 H -3.68159 4.42688 1.40041  
 H -2.63128 5.03381 2.70453  
 H -2.20510 5.35695 1.01156  
 C -1.40800 3.20850 -1.50939  
 C -1.91487 2.31101 -2.66493  
 H -3.01571 2.27346 -2.70741  
 H -1.55739 2.73322 -3.62126  
 H -1.52755 1.28046 -2.58160  
 C -2.00845 4.62111 -1.64459  
 H -1.55241 5.33666 -0.94304  
 H -1.80573 4.99340 -2.66519  
 H -3.10045 4.62665 -1.49855  
 C 0.13637 3.25536 -1.54237  
 H 0.45481 3.63703 -2.52918  
 H 0.55107 3.93436 -0.78015  
 H 0.58245 2.25629 -1.40472  
 C 0.40917 -0.00565 0.34093  
 H -0.23213 -0.00437 1.33708  
 C 1.66376 -0.00728 0.27346  
 C 3.07473 -0.00065 0.15859  
 C 3.78010 1.23066 0.08150  
 C 3.79807 -1.22341 0.12848  
 H 3.20466 2.16069 0.10836  
 H 3.23699 -2.16041 0.19383  
 C 5.17934 1.25572 -0.02587  
 C 5.19761 -1.23223 0.02271  
 C 5.85776 0.01567 -0.05281  
 H 6.94570 0.02200 -0.13517

|   |         |          |          |   |          |          |          |
|---|---------|----------|----------|---|----------|----------|----------|
| C | 5.91938 | 2.60947  | -0.10806 | H | -2.95843 | 2.86107  | 1.65471  |
| C | 5.61366 | 3.43609  | 1.16967  | H | -2.41388 | 3.44996  | 0.07096  |
| C | 5.42358 | 3.38628  | -1.35701 | C | 0.36422  | 3.20092  | -1.55657 |
| H | 5.63262 | 2.82477  | -2.28344 | C | 1.73549  | 3.00357  | -2.24707 |
| H | 4.33839 | 3.58090  | -1.31715 | H | 1.98191  | 1.93538  | -2.37403 |
| H | 5.93568 | 4.36167  | -1.42577 | H | 1.68955  | 3.46008  | -3.25205 |
| H | 4.53437 | 3.63361  | 1.28498  | H | 2.55244  | 3.49510  | -1.69415 |
| H | 6.12852 | 4.41134  | 1.12324  | C | -0.73984 | 2.53844  | -2.41207 |
| H | 5.95956 | 2.91015  | 2.07570  | H | -1.74043 | 2.62351  | -1.95939 |
| C | 5.95754 | -2.57709 | -0.00620 | H | -0.77463 | 3.04925  | -3.39111 |
| C | 5.47255 | -3.41055 | -1.22246 | H | -0.52696 | 1.47206  | -2.59645 |
| C | 5.66492 | -3.35627 | 1.30401  | C | 0.08973  | 4.70688  | -1.36980 |
| H | 6.00379 | -2.78944 | 2.18776  | H | 0.82093  | 5.18347  | -0.69723 |
| H | 4.58873 | -3.56473 | 1.42870  | H | 0.17429  | 5.19984  | -2.35534 |
| H | 6.19397 | -4.32497 | 1.29599  | C | -0.92643 | 4.90879  | -0.99495 |
| H | 4.39040 | -3.61947 | -1.17352 | C | 2.46575  | -3.25712 | 0.93560  |
| H | 5.99892 | -4.38028 | -1.25269 | C | 2.25646  | -2.62100 | 2.33082  |
| H | 5.67275 | -2.88357 | -2.17089 | H | 1.41473  | -1.90749 | 2.34112  |
| C | 7.45039 | 2.43806  | -0.21987 | H | 2.02902  | -3.42505 | 3.05328  |
| H | 7.87410 | 1.91830  | 0.65674  | H | 3.15890  | -2.09684 | 2.68404  |
| H | 7.73973 | 1.88230  | -1.12847 | C | 1.19736  | -4.04257 | 0.52694  |
| H | 7.92818 | 3.43042  | -0.27576 | H | 1.30420  | -4.54332 | -0.44746 |
| C | 7.48576 | -2.38768 | -0.12681 | H | 1.01920  | -4.82690 | 1.28445  |
| H | 7.76615 | -1.86394 | -1.05699 | H | 0.29883  | -3.40704 | 0.48470  |
| H | 7.90250 | -1.82763 | 0.72805  | C | 3.69036  | -4.19413 | 0.97359  |
| H | 7.97811 | -3.37434 | -0.14425 | H | 4.62693  | -3.64947 | 1.17284  |

**TS (C-D)<sub>O-Ar</sub>**

SCF (BP86) Energy = -1775.54168760  
 Enthalpy 0K = -1774.663114  
 Enthalpy 298K = -1774.608083  
 Free Energy 298K = -1774.749224  
 Lowest Frequency = -235.7898 cm<sup>-1</sup>  
 Second Frequency = 9.5233 cm<sup>-1</sup>  
 SCF (BP86-D3BJ) Energy = -1775.81188  
 SCF (FB) Energy = -1775.580964  
 SCF (DFB) Energy = -1775.586755  
 SCF (BS2) Energy = -2445.254759

|    |          |          |          |   |          |          |          |
|----|----------|----------|----------|---|----------|----------|----------|
| Rh | 1.24909  | 0.08209  | -0.14872 | H | 3.54707  | -4.92309 | 1.79197  |
| P  | 0.47197  | 2.24323  | 0.10265  | H | 3.80244  | -4.77190 | 0.04281  |
| P  | 2.70742  | -1.77984 | -0.26832 | C | 3.45109  | -2.24344 | -1.97975 |
| N  | 2.97779  | 0.94551  | 0.65200  | C | 3.39788  | -0.93392 | -2.80358 |
| C  | 3.00550  | 2.27804  | 0.98077  | H | 4.01783  | -0.13708 | -2.35671 |
| C  | 4.14524  | 2.90888  | 1.49665  | H | 3.80135  | -1.13747 | -3.81206 |
| H  | 4.09969  | 3.97091  | 1.74175  | H | 2.36253  | -0.57202 | -2.91087 |
| C  | 5.30126  | 2.14106  | 1.67884  | C | 4.91295  | -2.72959 | -1.87957 |
| H  | 6.20564  | 2.60550  | 2.08208  | H | 5.00785  | -3.69610 | -1.36399 |
| C  | 5.30672  | 0.78393  | 1.34000  | H | 5.29603  | -2.86518 | -2.90701 |
| H  | 6.18811  | 0.15185  | 1.45725  | H | 5.56095  | -1.99807 | -1.37297 |
| C  | 4.13121  | 0.22183  | 0.82137  | C | 2.55874  | -3.31201 | -2.64993 |
| O  | 1.88323  | 3.01134  | 0.81764  | H | 2.90157  | -3.44544 | -3.69198 |
| O  | 4.14410  | -1.08024 | 0.47399  | H | 2.64116  | -4.29247 | -2.15308 |
| C  | -0.80984 | 2.77567  | 1.43060  | H | 1.50072  | -3.00300 | -2.68030 |
| C  | -0.63783 | 1.76331  | 2.58698  | C | 0.07222  | -1.11543 | -1.48747 |
| H  | 0.38368  | 1.78123  | 3.00272  | H | -0.11645 | -1.04886 | 0.55637  |
| H  | -1.33492 | 2.03323  | 3.40031  | C | -0.77264 | -1.03871 | -0.44639 |
| H  | -0.86954 | 0.73429  | 2.27028  | C | -2.22170 | -0.89439 | -0.23895 |
| C  | -0.53630 | 4.20057  | 1.96185  | C | -3.06808 | -0.62218 | -1.33865 |
| H  | -0.66483 | 4.97570  | 1.19335  | C | -2.78453 | -1.11524 | 1.03714  |
| H  | -1.26655 | 4.40688  | 2.76501  | H | -2.61506 | -0.47331 | -2.32366 |
| H  | 0.47242  | 4.29601  | 2.39075  | H | -2.11788 | -1.35578 | 1.87333  |
| C  | -2.23383 | 2.68182  | 0.84039  | C | -4.46406 | -0.56629 | -1.17816 |
| H  | -2.46028 | 1.69021  | 0.41531  | C | -4.17758 | -1.06713 | 1.23650  |
|    |          |          |          | C | -4.98850 | -0.78576 | 0.11611  |
|    |          |          |          | H | -6.07011 | -0.74791 | 0.25312  |
|    |          |          |          | C | -5.36579 | -0.29378 | -2.40311 |
|    |          |          |          | C | -5.16016 | -1.42839 | -3.44288 |
|    |          |          |          | C | -4.97491 | 1.06570  | -3.04166 |
|    |          |          |          | H | -5.11923 | 1.89615  | -2.32903 |
|    |          |          |          | H | -3.92287 | 1.07794  | -3.37370 |
|    |          |          |          | H | -5.60402 | 1.26503  | -3.92637 |
|    |          |          |          | H | -4.11362 | -1.48835 | -3.78621 |
|    |          |          |          | H | -5.79407 | -1.25128 | -4.32896 |
|    |          |          |          | H | -5.43322 | -2.40923 | -3.01832 |
|    |          |          |          | C | -4.76600 | -1.35228 | 2.63681  |
|    |          |          |          | C | -4.18437 | -0.34286 | 3.66146  |

C -4.38079 -2.79510 3.06182  
 H -4.78139 -3.53797 2.35156  
 H -3.28711 -2.93174 3.11254  
 H -4.79285 -3.01950 4.06090  
 H -3.08369 -0.39702 3.71586  
 H -4.57725 -0.55598 4.67058  
 H -4.46373 0.69254 3.40039  
 C -6.86350 -0.23958 -2.03030  
 H -7.22021 -1.19589 -1.61083  
 H -7.08010 0.56209 -1.30307  
 H -7.46117 -0.03499 -2.93420  
 C -6.30581 -1.23364 2.66370  
 H -6.64790 -0.22156 2.38648  
 H -6.78845 -1.96144 1.98925  
 H -6.67258 -1.43839 3.68348

**TS (C-10)<sub>O-Ar</sub>**

SCF (BP86) Energy = -1775.58495610  
 Enthalpy 0K = -1774.707946  
 Enthalpy 298K = -1774.652095  
 Free Energy 298K = -1774.798294  
 Lowest Frequency = -603.8489 cm<sup>-1</sup>  
 Second Frequency = 4.3197 cm<sup>-1</sup>  
 SCF (BP86-D3BJ) Energy = -  
 1775.842685  
 SCF (FB) Energy = -1775.622451  
 SCF (DFB) Energy = -1775.62787  
 SCF (BS2) Energy = -2445.299445

Rh -1.58239 0.00048 0.04733  
 P -1.92320 -2.27475 0.02094  
 P -1.91935 2.27663 0.01562  
 N -3.66452 0.00207 -0.06910  
 C -4.36477 -1.17293 -0.15254  
 C -5.76386 -1.21094 -0.23803  
 H -6.26880 -2.17596 -0.29972  
 C -6.45832 0.00473 -0.24193  
 H -7.55013 0.00574 -0.30874  
 C -5.76621 1.21915 -0.16276  
 H -6.27291 2.18520 -0.16595  
 C -4.36713 1.17855 -0.07822  
 O -3.68137 -2.33874 -0.15622  
 O -3.68646 2.34316 0.00137  
 C -1.75888 -3.25144 1.66753  
 C -2.61351 -2.46465 2.68990  
 H -3.68960 -2.53163 2.46342  
 H -2.45248 -2.89668 3.69399  
 H -2.32643 -1.39881 2.72486  
 C -2.24911 -4.70975 1.58589  
 H -1.57879 -5.34185 0.98190  
 H -2.26616 -5.13587 2.60555  
 H -3.26986 -4.78278 1.17785  
 C -0.27679 -3.19730 2.10197  
 H 0.07725 -2.15789 2.20509  
 H -0.17867 -3.68296 3.08952  
 H 0.39234 -3.72800 1.40590  
 C -1.45294 -3.27009 -1.55164  
 C -1.65498 -2.27578 -2.72096  
 H -1.05741 -1.35816 -2.58668  
 H -1.34229 -2.76437 -3.66174  
 H -2.71342 -1.98594 -2.83151  
 C 0.04012 -3.65250 -1.44835  
 H 0.22003 -4.42834 -0.68594  
 H 0.36963 -4.06536 -2.41881

H 0.67780 -2.77900 -1.22678  
 C -2.33030 -4.51674 -1.78871  
 H -3.40283 -4.26745 -1.78853  
 H -2.08233 -4.93308 -2.78193  
 H -2.15556 -5.31005 -1.04784  
 C -1.62804 3.30802 1.60954  
 C -1.95758 2.34108 2.77246  
 H -1.34981 1.42132 2.72747  
 H -1.75267 2.85176 3.73095  
 H -3.02088 2.04857 2.77041  
 C -0.13523 3.70022 1.66527  
 H 0.12263 4.46536 0.91490  
 H 0.08503 4.12886 2.65948  
 H 0.53140 2.83118 1.52498  
 C -2.53066 4.55453 1.71704  
 H -3.59566 4.29793 1.60712  
 H -2.39335 4.99936 2.71934  
 H -2.27960 5.32819 0.97747  
 C -1.56623 3.21470 -1.62242  
 C -2.28482 2.38972 -2.71712  
 H -3.38110 2.44381 -2.61994  
 H -2.01345 2.80162 -3.70577  
 H -1.98000 1.32866 -2.69219  
 C -2.07716 4.66777 -1.64186  
 H -1.49300 5.32468 -0.97780  
 H -1.97141 5.06664 -2.66718  
 H -3.14148 4.73818 -1.36583  
 C -0.04121 3.16364 -1.87041  
 H 0.16880 3.59393 -2.86626  
 H 0.52744 3.75231 -1.13259  
 H 0.33933 2.12918 -1.86151  
 C 0.36399 0.00061 0.07862  
 H 0.87412 -0.03639 1.21104  
 C 1.64529 -0.00019 0.08475  
 C 3.07872 -0.00109 0.06135  
 C 3.78532 -1.22887 0.03208  
 C 3.78658 1.22624 0.05451  
 H 3.21412 -2.16192 0.03669  
 H 3.21622 2.15953 0.07453  
 C 5.18965 -1.24646 -0.00708  
 C 5.19100 1.24280 0.01461  
 C 5.85945 -0.00202 -0.01382  
 H 6.95016 -0.00236 -0.04386  
 C 5.94280 2.59205 0.00265  
 C 5.57923 3.38961 1.28381  
 C 5.51367 3.40223 -1.24999  
 H 5.76408 2.86185 -2.17863  
 H 4.42932 3.60547 -1.25875  
 H 6.03534 4.37462 -1.26939  
 H 4.49716 3.59465 1.34987  
 H 6.10273 4.36118 1.28656  
 H 5.87604 2.83962 2.19300  
 C 5.93981 -2.59622 -0.04272  
 C 5.50945 -3.38402 -1.30915  
 C 5.57554 -3.41552 1.22445  
 H 5.87316 -2.88181 2.14301  
 H 4.49320 -3.62032 1.28719  
 H 6.09783 -4.38764 1.21016  
 H 4.42490 -3.58600 -1.32107  
 H 6.03007 -4.35648 -1.34561  
 H 5.76017 -2.82787 -2.22834  
 C 7.47616 2.41061 -0.03760  
 H 7.85245 1.86556 0.84528  
 H 7.80663 1.87632 -0.94501

H 7.96274 3.40013 -0.04417  
 C 7.47338 -2.41596 -0.08025  
 H 7.80416 -1.86609 -0.97819  
 H 7.85062 -1.88707 0.81200  
 H 7.95874 -3.40579 -0.10451

**TS (C-E)<sub>o-Ar</sub>**

SCF (BP86) Energy = -1775.59461421  
 Enthalpy 0K = -1774.717044  
 Enthalpy 298K = -1774.661456  
 Free Energy 298K = -1774.806629  
 Lowest Frequency = -629.9917 cm<sup>-1</sup>  
 Second Frequency = 5.0932 cm<sup>-1</sup>  
 SCF (BP86-D3BJ) Energy = -  
 1775.854929  
 SCF (FB) Energy = -1775.6356  
 SCF (DFB) Energy = -1775.641791  
 SCF (BS2) Energy = -2445.310446

Rh -1.58438 -0.00000 -0.01117  
 P -1.91767 -2.29434 0.01510  
 P -1.91774 2.29433 0.01528  
 N -3.67579 -0.00003 -0.00600  
 C -4.37342 -1.17999 -0.01316  
 C -5.77438 -1.21801 -0.02592  
 H -6.28428 -2.18237 -0.02941  
 C -6.46652 -0.00008 -0.03222  
 H -7.56032 -0.00010 -0.04168  
 C -5.77442 1.21788 -0.02582  
 H -6.28435 2.18222 -0.02924  
 C -4.37346 1.17989 -0.01307  
 O -3.68487 -2.34353 -0.00662  
 O -3.68495 2.34346 -0.00644  
 C -1.58469 -3.27111 1.62767  
 C -2.33293 -2.50103 2.74190  
 H -3.42593 -2.54088 2.60881  
 H -2.09390 -2.97204 3.71191  
 H -2.02127 -1.44401 2.79355  
 C -2.08790 -4.72718 1.57061  
 H -1.49159 -5.34684 0.88261  
 H -1.98878 -5.17201 2.57709  
 H -3.14913 -4.79168 1.28130  
 C -0.06287 -3.22268 1.89757  
 H 0.33164 -2.19306 1.89588  
 H 0.12800 -3.65667 2.89530  
 H 0.51247 -3.81244 1.16696  
 C -1.56683 -3.23409 -1.61707  
 C -1.87243 -2.20471 -2.73295  
 H -1.23882 -1.30531 -2.64349  
 H -1.66189 -2.67016 -3.71271  
 H -2.93242 -1.89822 -2.73512  
 C -0.06431 -3.59272 -1.64088  
 H 0.17996 -4.40225 -0.93393  
 H 0.19634 -3.95227 -2.65246  
 H 0.57473 -2.71943 -1.42239  
 C -2.45059 -4.48245 -1.81406  
 H -3.52289 -4.24344 -1.73755  
 H -2.26607 -4.88035 -2.82828  
 H -2.21931 -5.28569 -1.09983  
 C -1.58480 3.27098 1.62793  
 C -2.33301 2.50078 2.74209  
 H -2.02132 1.44377 2.79365  
 H -2.09399 2.97171 3.71215  
 H -3.42602 2.54062 2.60901

C -0.06297 3.22257 1.89782  
 H 0.51235 3.81242 1.16726  
 H 0.12788 3.65648 2.89559  
 H 0.33157 2.19297 1.89603  
 C -2.08805 4.72704 1.57099  
 H -3.14928 4.79153 1.28169  
 H -1.98895 5.17178 2.57752  
 H -1.49176 5.34677 0.88305  
 C -1.56694 3.23423 -1.61681  
 C -1.87251 2.20493 -2.73278  
 H -2.93249 1.89841 -2.73497  
 H -1.66199 2.67047 -3.71250  
 H -1.23888 1.30554 -2.64339  
 C -2.45073 4.48258 -1.81369  
 H -2.21947 5.28577 -1.09941  
 H -2.26625 4.88056 -2.82788  
 H -3.52303 4.24353 -1.73719  
 C -0.06443 3.59290 -1.64060  
 H 0.19620 3.95255 -2.65216  
 H 0.17982 4.40238 -0.93358  
 H 0.57464 2.71961 -1.42219  
 C 0.37738 0.00002 -0.08646  
 H -0.64232 -0.00004 1.23596  
 C 1.62336 0.00002 -0.00572  
 C 3.04887 0.00002 -0.00687  
 C 3.76729 1.22306 -0.00496  
 C 3.76730 -1.22301 -0.00475  
 H 3.19889 2.15814 -0.00637  
 H 3.19890 -2.15809 -0.00599  
 C 5.17192 1.24136 -0.00201  
 C 5.17192 -1.24131 -0.00178  
 C 5.84648 0.00003 -0.00045  
 H 6.93747 0.00003 0.00129  
 C 5.92076 2.59305 -0.00177  
 C 5.52160 3.39851 1.26349  
 C 5.52620 3.39624 -1.26993  
 H 5.80361 2.85025 -2.18766  
 H 4.44168 3.59458 -1.31035  
 H 6.04550 4.37044 -1.28137  
 H 4.43687 3.59660 1.29967  
 H 6.04051 4.37291 1.27489  
 H 5.79601 2.85439 2.18324  
 C 5.92077 -2.59299 -0.00130  
 C 5.52624 -3.39640 -1.26934  
 C 5.52158 -3.39824 1.26408  
 H 5.79597 -2.85397 2.18375  
 H 4.43684 -3.59634 1.30027  
 H 6.04049 -4.37265 1.27566  
 H 4.44172 -3.59474 -1.30975  
 H 6.04553 -4.37060 -1.28061  
 H 5.80367 -2.85056 -2.18715  
 C 7.45541 2.41742 0.00115  
 H 7.80825 1.87823 0.89716  
 H 7.81144 1.87695 -0.89282  
 H 7.93980 3.40837 0.00127  
 C 7.45541 -2.41737 0.00163  
 H 7.81146 -1.87705 -0.89243  
 H 7.80823 -1.87801 0.89755  
 H 7.93981 -3.40831 0.00193

**E<sub>o-Ar</sub>**

SCF (BP86) Energy = -1775.60047370  
 Enthalpy 0K = -1774.721048  
 Enthalpy 298K = -1774.665442

Free Energy 298K = -1774.809748  
 Lowest Frequency = 5.3868 cm<sup>-1</sup>  
 Second Frequency = 14.0854 cm<sup>-1</sup>  
 SCF (BP86-D3BJ) Energy = -  
 1775.861389  
 SCF (FB) Energy = -1775.643132  
 SCF (DFB) Energy = -1775.649931  
 SCF (BS2) Energy = -2445.315253

|    |          |          |          |
|----|----------|----------|----------|
| Rh | -1.59081 | 0.00005  | 0.02325  |
| P  | -1.92091 | -2.29453 | 0.03172  |
| P  | -1.92062 | 2.29462  | 0.03045  |
| N  | -3.68709 | 0.00013  | -0.07165 |
| C  | -4.37910 | -1.17941 | -0.09063 |
| C  | -5.77941 | -1.21851 | -0.13949 |
| H  | -6.29005 | -2.18242 | -0.15552 |
| C  | -6.47047 | 0.00029  | -0.16422 |
| H  | -7.56365 | 0.00036  | -0.20163 |
| C  | -5.77925 | 1.21902  | -0.14017 |
| H  | -6.28976 | 2.18298  | -0.15672 |
| C  | -4.37894 | 1.17976  | -0.09129 |
| O  | -3.68498 | -2.34267 | -0.06803 |
| O  | -3.68467 | 2.34295  | -0.06935 |
| C  | -1.63704 | -3.29764 | 1.63660  |
| C  | -2.49100 | -2.61809 | 2.73225  |
| H  | -3.57029 | -2.69480 | 2.52541  |
| H  | -2.29285 | -3.12762 | 3.69178  |
| H  | -2.22935 | -1.55426 | 2.86357  |
| C  | -2.04999 | -4.77765 | 1.50408  |
| H  | -1.39356 | -5.33374 | 0.81642  |
| H  | -1.96015 | -5.25587 | 2.49590  |
| H  | -3.09482 | -4.89240 | 1.17320  |
| C  | -0.13687 | -3.16763 | 1.99099  |
| H  | 0.19278  | -2.11629 | 2.03004  |
| H  | 0.02607  | -3.61696 | 2.98689  |
| H  | 0.50998  | -3.70309 | 1.27848  |
| C  | -1.48512 | -3.19908 | -1.59921 |
| C  | -1.71385 | -2.13863 | -2.70442 |
| H  | -1.06311 | -1.25693 | -2.56448 |
| H  | -1.46075 | -2.58366 | -3.68361 |
| H  | -2.76543 | -1.80836 | -2.75485 |
| C  | 0.01282  | -3.57322 | -1.54572 |
| H  | 0.21022  | -4.39514 | -0.83862 |
| H  | 0.32480  | -3.92079 | -2.54692 |
| H  | 0.64631  | -2.70897 | -1.27921 |
| C  | -2.37188 | -4.42981 | -1.87673 |
| H  | -3.44348 | -4.17630 | -1.86066 |
| H  | -2.13061 | -4.80929 | -2.88609 |
| H  | -2.19614 | -5.25083 | -1.16706 |
| C  | -1.63661 | 3.29859  | 1.63477  |
| C  | -2.49050 | 2.61964  | 2.73086  |
| H  | -2.22884 | 1.55589  | 2.86276  |
| H  | -2.29230 | 3.12972  | 3.69008  |
| H  | -3.56981 | 2.69623  | 2.52404  |
| C  | -0.13642 | 3.16876  | 1.98913  |
| H  | 0.51037  | 3.70386  | 1.27630  |
| H  | 0.02658  | 3.61859  | 2.98479  |
| H  | 0.19324  | 2.11744  | 2.02868  |
| C  | -2.04955 | 4.77853  | 1.50150  |
| H  | -3.09441 | 4.89312  | 1.17065  |
| H  | -1.95961 | 5.25729  | 2.49305  |
| H  | -1.39318 | 5.33424  | 0.81347  |
| C  | -1.48464 | 3.19813  | -1.60101 |
| C  | -1.71331 | 2.13699  | -2.70558 |
| H  | -2.76489 | 1.80671  | -2.75588 |

|   |          |          |          |
|---|----------|----------|----------|
| H | -1.46012 | 2.58142  | -3.68502 |
| H | -1.06259 | 1.25538  | -2.56504 |
| C | -2.37135 | 4.42870  | -1.87938 |
| H | -2.19563 | 5.25017  | -1.17021 |
| H | -2.13001 | 4.80754  | -2.88896 |
| H | -3.44296 | 4.17524  | -1.86320 |
| C | 0.01330  | 3.57225  | -1.54761 |
| H | 0.32540  | 3.91917  | -2.54900 |
| H | 0.21064  | 4.39462  | -0.84102 |
| H | 0.64674  | 2.70816  | -1.28047 |
| C | 0.36468  | -0.00001 | 0.01686  |
| H | -1.55059 | 0.00056  | 1.54282  |
| C | 1.61113  | -0.00005 | 0.04177  |
| C | 3.03858  | -0.00009 | 0.02218  |
| C | 3.75866  | 1.22168  | 0.01587  |
| C | 3.75861  | -1.22188 | 0.01435  |
| H | 3.19074  | 2.15716  | 0.02333  |
| H | 3.19065  | -2.15735 | 0.02066  |
| C | 5.16339  | 1.24053  | 0.00295  |
| C | 5.16334  | -1.24076 | 0.00137  |
| C | 5.83886  | -0.00013 | -0.00443 |
| H | 6.92979  | -0.00014 | -0.01508 |
| C | 5.91158  | 2.59266  | -0.00296 |
| C | 5.52673  | 3.39594  | 1.26808  |
| C | 5.50261  | 3.39821  | -1.26499 |
| H | 5.77034  | 2.85410  | -2.18674 |
| H | 4.41745  | 3.59520  | -1.29290 |
| H | 6.02075  | 4.37306  | -1.28047 |
| H | 4.44231  | 3.59295  | 1.31717  |
| H | 6.04524  | 4.37068  | 1.27548  |
| H | 5.81180  | 2.85008  | 2.18354  |
| C | 5.91148  | -2.59292 | -0.00624 |
| C | 5.50229  | -3.39699 | -1.26915 |
| C | 5.52676  | -3.39765 | 1.26392  |
| H | 5.81197  | -2.85286 | 2.17997  |
| H | 4.44235  | -3.59468 | 1.31293  |
| H | 6.04524  | -4.37242 | 1.27014  |
| H | 4.41712  | -3.59391 | -1.29715 |
| H | 6.02039  | -4.37185 | -1.28582 |
| H | 5.76993  | -2.85183 | -2.19030 |
| C | 7.44631  | 2.41818  | -0.01780 |
| H | 7.80942  | 1.87763  | 0.87327  |
| H | 7.79235  | 1.87898  | -0.91646 |
| H | 7.93027  | 3.40940  | -0.02165 |
| C | 7.44621  | -2.41849 | -0.02110 |
| H | 7.79212  | -1.87819 | -0.91914 |
| H | 7.80948  | -1.87905 | 0.87057  |
| H | 7.93012  | -3.40972 | -0.02625 |

**10<sub>O-Ar</sub>**

SCF (BP86) Energy = -1775.61581242  
 Enthalpy 0K = -1774.734340  
 Enthalpy 298K = -1774.678732  
 Free Energy 298K = -1774.823642  
 Lowest Frequency = 8.1893 cm<sup>-1</sup>  
 Second Frequency = 11.0302 cm<sup>-1</sup>  
 SCF (BP86-D3BJ) Energy = -  
 1775.878639  
 SCF (FB) Energy = -1775.655648  
 SCF (DFB) Energy = -1775.661348  
 SCF (BS2) Energy = -2445.329201

|    |         |          |         |
|----|---------|----------|---------|
| Rh | 1.42529 | -0.00078 | 0.25099 |
| P  | 1.33826 | 2.32504  | 0.27074 |

P 2.16466 -2.19217 0.06726  
 N 3.42481 0.38984 -0.28637  
 C 3.86837 1.67864 -0.42504  
 C 5.19326 1.97520 -0.77647  
 H 5.50259 3.01649 -0.87601  
 C 6.07235 0.90508 -0.98630  
 H 7.11159 1.10732 -1.26196  
 C 5.64092 -0.42042 -0.84645  
 H 6.30405 -1.27259 -1.00113  
 C 4.30288 -0.64147 -0.49074  
 O 3.00139 2.69286 -0.22368  
 O 3.86715 -1.90990 -0.33536  
 C 1.32607 3.16895 1.99195  
 C 2.42796 2.44475 2.80235  
 H 3.43523 2.64675 2.40315  
 H 2.39900 2.81493 3.84281  
 H 2.26702 1.35260 2.82382  
 C 1.61698 4.68126 1.94437  
 H 0.78492 5.25209 1.50316  
 H 1.74740 5.04614 2.97926  
 H 2.54132 4.91196 1.39089  
 C -0.05134 2.88844 2.63603  
 H -0.29318 1.81287 2.64273  
 H -0.02445 3.23881 3.68349  
 H -0.87123 3.42357 2.13196  
 C 0.42699 3.27290 -1.12288  
 C 0.59051 2.37851 -2.37559  
 H 0.18821 1.36424 -2.21110  
 H 0.03833 2.83830 -3.21476  
 H 1.64657 2.28970 -2.68199  
 C -1.06621 3.37501 -0.74149  
 H -1.23656 4.07996 0.08817  
 H -1.62571 3.75697 -1.61387  
 H -1.50707 2.39900 -0.47398  
 C 1.02358 4.66666 -1.40979  
 H 2.10428 4.61790 -1.61473  
 H 0.52851 5.07611 -2.30869  
 H 0.85395 5.37878 -0.58959  
 C 2.42012 -3.26081 1.63782  
 C 2.78521 -2.24994 2.75166  
 H 1.99896 -1.48890 2.89074  
 H 2.90967 -2.79890 3.70246  
 H 3.73613 -1.73225 2.54035  
 C 1.07765 -3.94826 1.97410  
 H 0.83652 -4.75889 1.26777  
 H 1.15456 -4.40156 2.97855  
 H 0.23337 -3.23773 1.99431  
 C 3.55456 -4.29703 1.49657  
 H 4.50702 -3.82595 1.20852  
 H 3.70258 -4.78385 2.47732  
 H 3.32138 -5.08774 0.76927  
 C 1.61885 -3.15225 -1.49878  
 C 1.89583 -2.18953 -2.67842  
 H 2.97417 -2.01931 -2.82911  
 H 1.49455 -2.64183 -3.60294  
 H 1.39919 -1.21386 -2.53308  
 C 2.37725 -4.47669 -1.71068  
 H 2.10243 -5.23868 -0.96419  
 H 2.10612 -4.88217 -2.70224  
 H 3.47039 -4.33923 -1.69503  
 C 0.09626 -3.39790 -1.38543  
 H -0.25754 -3.83580 -2.33597  
 H -0.16144 -4.10635 -0.58283  
 H -0.46296 -2.46360 -1.21366

C -0.29691 -0.35629 0.80144  
 H -1.49806 -1.00005 2.31915  
 C -1.50610 -0.62657 1.27952  
 C -2.83413 -0.47132 0.64616  
 C -2.98135 -0.26399 -0.74426  
 C -3.98458 -0.54615 1.45827  
 H -2.08258 -0.23293 -1.37074  
 H -3.85966 -0.71142 2.53429  
 C -4.25579 -0.13274 -1.32669  
 C -5.27522 -0.41220 0.91253  
 C -5.38279 -0.20605 -0.47872  
 H -6.37641 -0.10905 -0.91777  
 C -6.50862 -0.50001 1.83854  
 C -6.42415 0.61966 2.91039  
 C -6.52513 -1.88444 2.54029  
 H -6.58999 -2.70226 1.80251  
 H -5.62011 -2.04935 3.14907  
 H -7.39758 -1.96033 3.21240  
 H -5.51566 0.53012 3.52972  
 H -7.29535 0.56657 3.58635  
 H -6.41665 1.61826 2.44096  
 C -4.38635 0.06102 -2.85511  
 C -3.75930 -1.15967 -3.58033  
 C -3.63582 1.35057 -3.28011  
 H -4.06544 2.23876 -2.78569  
 H -2.56361 1.30298 -3.02353  
 H -3.71296 1.49649 -4.37188  
 H -2.69030 -1.27820 -3.33383  
 H -3.84017 -1.03796 -4.67479  
 H -4.27591 -2.09357 -3.30105  
 C -7.83650 -0.33236 1.06752  
 H -7.90229 0.64868 0.56608  
 H -7.97598 -1.12111 0.30825  
 H -8.68263 -0.39988 1.77183  
 C -5.85676 0.18909 -3.31136  
 H -6.44222 -0.71594 -3.07559  
 H -6.35849 1.05689 -2.84981  
 H -5.89304 0.32940 -4.40491

**TS(B-10) 'o-Ar**

SCF (BP86) Energy = -1775.51764068  
 Enthalpy 0K = -1774.637854  
 Enthalpy 298K = -1774.582764  
 Free Energy 298K = -1774.721335  
 Lowest Frequency = -273.8383 cm<sup>-1</sup>  
 Second Frequency = 20.4939 cm<sup>-1</sup>  
 SCF (BP86-D3BJ) Energy = -  
 1775.806318  
 SCF (FB) Energy = -1775.570888  
 SCF (DFB) Energy = -1775.57623  
 SCF (BS2) Energy = -2445.24517

Rh 1.09642 -0.12009 -0.23801  
 P 0.58051 -2.31206 0.14689  
 P 2.17319 1.93371 -0.55880  
 N 2.87467 -0.53715 0.71806  
 C 3.09217 -1.80595 1.21893  
 C 4.29622 -2.13037 1.87737  
 H 4.42320 -3.14233 2.26463  
 C 5.28608 -1.15321 2.00183  
 H 6.22527 -1.39202 2.50953  
 C 5.09077 0.12812 1.46750  
 H 5.84576 0.91324 1.52582  
 C 3.87613 0.38967 0.82422



O 2.15513 -2.74005 1.08219  
O 3.68923 1.61540 0.27047  
C 0.94614 -3.54703 -1.32136  
C 2.23510 -3.02939 -1.99970  
H 3.10405 -3.08070 -1.32512  
H 2.45070 -3.66563 -2.87735  
H 2.12465 -1.98779 -2.34501  
C 1.18910 -4.97579 -0.78939  
H 0.26175 -5.45139 -0.43192  
H 1.56546 -5.59183 -1.62622  
H 1.94248 -5.00190 0.01201  
C -0.19853 -3.57776 -2.35648  
H -0.32857 -2.60875 -2.86200  
H 0.05619 -4.32856 -3.12722  
H -1.16372 -3.86713 -1.91268  
C -0.59050 -3.02107 1.52917  
C -0.80261 -1.87854 2.54735  
H -1.35680 -1.03451 2.11309  
H -1.39174 -2.26947 3.39700  
H 0.15474 -1.50420 2.94682  
C -1.93962 -3.46989 0.92802  
H -1.81835 -4.31416 0.22942  
H -2.58896 -3.82070 1.75079  
H -2.46241 -2.65584 0.40481  
C 0.05151 -4.21215 2.28021  
H 1.00880 -3.94296 2.74683  
H -0.64946 -4.51007 3.08072  
H 0.21002 -5.09201 1.64203  
C 2.88065 2.36308 -2.29685  
C 3.19282 0.99563 -2.94982  
H 2.29579 0.35698 -3.01441  
H 3.57527 1.16594 -3.97270  
H 3.96640 0.44210 -2.39174  
C 1.78910 3.09002 -3.11203  
H 1.60701 4.11411 -2.74808  
H 2.12097 3.17044 -4.16274  
H 0.82935 2.54359 -3.11367  
C 4.17542 3.20104 -2.24379  
H 4.94290 2.72556 -1.61390  
H 4.58160 3.28055 -3.26845  
H 4.00807 4.22355 -1.87670  
C 1.62044 3.46812 0.45349  
C 1.54346 2.96703 1.91555  
H 2.54285 2.74338 2.32142  
H 1.09310 3.75804 2.54186  
H 0.92389 2.05748 2.00753  
C 2.59408 4.66005 0.36883  
H 2.58128 5.14037 -0.62250  
H 2.28169 5.42447 1.10353  
H 3.62857 4.36909 0.61116  
C 0.21372 3.88402 -0.03194  
H -0.16777 4.68343 0.62892  
H 0.22213 4.28646 -1.05749  
H -0.50157 3.04541 0.00323  
C -0.60162 0.13667 -1.45589  
H -0.71377 0.61830 -2.42662  
C -0.76144 -1.07100 -0.85765  
C -2.01780 0.02821 -0.57248  
C -3.19685 -0.28105 -1.31645  
C -2.11114 0.78782 0.62606  
H -3.08907 -0.87549 -2.22753  
H -1.17660 1.01483 1.14783  
C -4.45146 0.15625 -0.88481  
C -3.36348 1.21624 1.10479

C -4.49797 0.89089 0.32906  
H -5.47735 1.22616 0.68625  
C -5.75409 -0.13567 -1.65707  
C -6.71670 -0.94475 -0.74648  
C -5.49458 -0.95074 -2.94263  
H -4.83501 -0.41418 -3.64689  
H -5.04769 -1.93650 -2.72499  
H -6.44951 -1.13213 -3.46255  
H -6.27127 -1.91030 -0.45244  
H -7.65659 -1.15286 -1.28538  
H -6.97825 -0.39673 0.17422  
C -3.54158 2.01567 2.41333  
C -2.19790 2.25648 3.13294  
C -4.47379 1.22409 3.37002  
H -5.47238 1.05537 2.93363  
H -4.04364 0.24034 3.62371  
H -4.61401 1.78711 4.30847  
H -1.69932 1.31035 3.40691  
H -2.37444 2.81716 4.06576  
H -1.50232 2.85204 2.51768  
C -6.42062 1.20976 -2.05196  
H -5.76229 1.80457 -2.70779  
H -7.36070 1.01764 -2.59647  
H -6.66827 1.82532 -1.17090  
C -4.18127 3.39241 2.08899  
H -3.53914 3.98214 1.41275  
H -5.16985 3.28844 1.61134  
H -4.32151 3.97106 3.01794

**TS (B-10) "o-Ar**

SCF (BP86) Energy = -1775.54863066  
Enthalpy 0K = -1774.669963  
Enthalpy 298K = -1774.614420  
Free Energy 298K = -1774.756536  
Lowest Frequency = -321.7255 cm<sup>-1</sup>  
Second Frequency = 9.5419 cm<sup>-1</sup>  
SCF (BP86-D3BJ) Energy = -1775.82065  
SCF (FB) Energy = -1775.587193  
SCF (DFB) Energy = -1775.592631  
SCF (BS2) Energy = -2445.261953

Rh 1.17143 -0.15463 0.20058  
P 0.60346 -2.33443 -0.32425  
P 2.40320 1.77023 0.50352  
N 2.94678 -0.72760 -0.76702  
C 3.10296 -1.99556 -1.25883  
C 4.27158 -2.41763 -1.91072  
H 4.33385 -3.44208 -2.28060  
C 5.31478 -1.49720 -2.06046  
H 6.23750 -1.79706 -2.56545  
C 5.18334 -0.19449 -1.56409  
H 5.97311 0.55248 -1.65603  
C 3.98543 0.15052 -0.92334  
O 2.09110 -2.87538 -1.11322  
O 3.84574 1.40666 -0.44227  
C -0.59998 -2.73148 -1.77759  
C -0.53307 -1.48274 -2.68995  
H 0.48136 -1.32284 -3.09297  
H -1.21353 -1.62943 -3.54874  
H -0.84113 -0.56746 -2.15659  
C -0.18623 -3.97813 -2.58780  
H -0.25295 -4.90787 -2.00406  
H -0.87615 -4.07620 -3.44581  
H 0.83611 -3.89069 -2.98488

C -2.03256 -2.89867 -1.22877  
 H -2.35204 -2.04293 -0.61088  
 H -2.73090 -2.96568 -2.08279  
 H -2.14766 -3.82465 -0.64166  
 C 0.56104 -3.63012 1.09187  
 C 1.87762 -3.42024 1.87709  
 H 1.99059 -2.37107 2.20281  
 H 1.86051 -4.06007 2.77785  
 H 2.76089 -3.69995 1.28098  
 C -0.63225 -3.28244 2.01008  
 H -1.60491 -3.42557 1.51266  
 H -0.61082 -3.95041 2.89008  
 H -0.57136 -2.24292 2.37437  
 C 0.47236 -5.08789 0.60113  
 H 1.27593 -5.33233 -0.11189  
 H 0.58036 -5.76292 1.46972  
 H -0.49895 -5.31505 0.13296  
 C 1.91633 3.38823 -0.40905  
 C 1.27703 2.90054 -1.73216  
 H 0.45999 2.17899 -1.55805  
 H 0.86884 3.77073 -2.27755  
 H 2.02160 2.41543 -2.38518  
 C 0.86912 4.13048 0.44994  
 H 1.31585 4.57170 1.35643  
 H 0.44396 4.96208 -0.14052  
 H 0.03405 3.47648 0.75501  
 C 3.10544 4.31296 -0.74357  
 H 3.90412 3.77542 -1.27763  
 H 2.74190 5.11946 -1.40618  
 H 3.53883 4.79111 0.14616  
 C 3.25256 2.05360 2.21144  
 C 4.00649 0.73718 2.51638  
 H 4.85522 0.58090 1.83167  
 H 4.40866 0.78881 3.54423  
 C 3.33763 -0.13902 2.45381  
 C 4.24322 3.23463 2.21836  
 H 3.73223 4.20899 2.16152  
 H 4.80567 3.21797 3.16967  
 H 4.97488 3.16735 1.39771  
 C 2.15785 2.26280 3.27985  
 H 2.64091 2.38576 4.26614  
 H 1.54377 3.15953 3.09740  
 H 1.49384 1.38332 3.34449  
 C -0.54939 0.43151 1.09211  
 C -0.76679 0.86770 2.28144  
 H -1.02464 1.25666 3.25607  
 C -2.03485 0.58648 0.63485  
 C -2.37754 1.60987 -0.27933  
 C -3.03686 -0.25400 1.17603  
 H -1.59057 2.26026 -0.66521  
 H -2.74293 -1.01529 1.90151  
 C -3.70716 1.76162 -0.70637  
 C -4.38305 -0.11377 0.78058  
 C -4.68196 0.89289 -0.15842  
 H -5.72253 1.01670 -0.47543  
 C -5.51448 -0.99394 1.35481  
 C -4.98904 -2.03777 2.36437  
 C -6.21951 -1.74642 0.19481  
 H -6.65546 -1.05299 -0.54337  
 H -5.51523 -2.40827 -0.33779  
 H -7.03976 -2.36941 0.59090  
 H -4.26807 -2.73431 1.90131  
 H -5.83041 -2.64138 2.74317  
 H -4.50624 -1.56421 3.23691

C -4.13410 2.83770 -1.72742  
 C -4.77158 2.14717 -2.96285  
 C -2.94315 3.69387 -2.20963  
 H -2.46534 4.24075 -1.37809  
 H -2.17454 3.08390 -2.71566  
 H -3.29835 4.44419 -2.93537  
 H -4.04987 1.47756 -3.46125  
 H -5.09479 2.90651 -3.69552  
 H -5.65715 1.54886 -2.69148  
 C -5.17625 3.78008 -1.06607  
 H -6.07760 3.23652 -0.73793  
 H -4.74983 4.29095 -0.18601  
 H -5.49758 4.55150 -1.78690  
 C -6.54366 -0.08725 2.08225  
 H -6.99134 0.65683 1.40275  
 H -7.36455 -0.70002 2.49281  
 H -6.07355 0.45793 2.91842

**TS (10-F)<sub>o-Ar</sub>**

SCF (BP86) Energy = -1775.51764068  
 Enthalpy 0K = -1774.637854  
 Enthalpy 298K = -1774.582764  
 Free Energy 298K = -1774.721335  
 Lowest Frequency = -273.8383 cm<sup>-1</sup>  
 Second Frequency = 20.4939 cm<sup>-1</sup>  
 SCF (BP86-D3BJ) Energy = -  
 1775.802628  
 SCF (FB) Energy = -1775.556636  
 SCF (DFB) Energy = -1775.562191  
 SCF (BS2) Energy = -2445.232566

Rh 0.71125 0.17249 -0.22619  
 P 2.46611 -1.40007 -0.49800  
 P -0.21641 2.31439 0.14977  
 N 2.15415 0.94812 1.09323  
 C 3.19419 0.16592 1.52875  
 C 4.12938 0.61535 2.47013  
 H 4.92579 -0.05701 2.79204  
 C 4.02404 1.93558 2.92734  
 H 4.74531 2.31660 3.65621  
 C 3.01935 2.77751 2.43891  
 H 2.92018 3.81796 2.75128  
 C 2.10451 2.25047 1.51327  
 O 3.33179 -1.07319 1.01133  
 O 1.14949 3.05005 1.01416  
 C 3.82178 -0.82385 -1.77690  
 C 4.07338 0.68172 -1.52651  
 H 4.55218 0.87755 -0.55340  
 H 4.76306 1.04722 -2.30839  
 H 3.14267 1.26860 -1.59403  
 C 5.14658 -1.59172 -1.58401  
 H 5.07571 -2.64306 -1.90266  
 H 5.91516 -1.11400 -2.21830  
 H 5.50568 -1.55514 -0.54311  
 C 3.30591 -0.99366 -3.22266  
 H 2.37416 -0.43421 -3.39476  
 H 4.08029 -0.59811 -3.90498  
 H 3.13162 -2.04451 -3.49606  
 C 2.41840 -3.33070 -0.34577  
 C 1.15462 -3.67280 0.46625  
 H 0.23460 -3.37860 -0.06086  
 H 1.12318 -4.76656 0.61962  
 H 1.16764 -3.20159 1.46419  
 C 2.30013 -3.96235 -1.75040

H 3.22618 -3.86361 -2.33760  
H 2.10845 -5.04311 -1.62432  
H 1.46135 -3.53883 -2.32670  
C 3.65424 -3.88038 0.40257  
H 3.73926 -3.46769 1.41880  
H 3.52498 -4.97421 0.49192  
H 4.59990 -3.70334 -0.12694  
C -0.29941 3.56307 -1.32451  
C 0.65244 3.00665 -2.40814  
H 0.38389 1.98378 -2.71753  
H 0.60087 3.66655 -3.29339  
H 1.69993 3.00077 -2.06263  
C -1.74369 3.59514 -1.86854  
H -2.44441 4.08022 -1.17055  
H -1.75355 4.18112 -2.80496  
H -2.12645 2.58926 -2.10624  
C 0.15923 4.98413 -0.93098  
H 1.18384 4.99106 -0.52990  
H 0.14954 5.60652 -1.84417  
H -0.50493 5.46375 -0.19831  
C -1.50748 2.67459 1.55066  
C -1.00454 1.87550 2.77704  
H -0.05367 2.26624 3.17348  
H -1.75688 1.96694 3.58107  
H -0.88778 0.80254 2.54965  
C -1.57163 4.17670 1.89820  
H -2.06557 4.76628 1.10941  
H -2.17888 4.29178 2.81457  
H -0.57842 4.60689 2.09996  
C -2.90834 2.16112 1.16358  
H -3.59794 2.40274 1.99318  
H -3.30662 2.64279 0.25780  
H -2.92914 1.07214 1.01700  
C 0.03266 -0.71155 -1.85714  
H -0.18504 -1.65792 -3.95863  
C -0.03627 -1.23579 -2.98109  
C -1.30017 -0.68951 -0.44437  
C -2.43176 -0.27380 -1.18026  
C -1.46680 -1.51540 0.68336  
H -2.28878 0.32471 -2.08289  
H -0.59912 -1.83966 1.26016  
C -3.72263 -0.72056 -0.83556  
C -2.76300 -1.90370 1.10943  
C -3.86356 -1.51524 0.32310  
H -4.85991 -1.85004 0.61274  
C -4.92065 -0.39306 -1.75960  
C -4.69139 -1.09534 -3.12567  
C -5.03742 1.13518 -1.98668  
H -5.21465 1.66846 -1.03710  
H -4.13224 1.55578 -2.45621  
H -5.88440 1.35384 -2.65967  
H -3.76617 -0.74524 -3.61435  
H -5.53357 -0.88712 -3.80852  
H -4.61489 -2.18873 -3.00037  
C -2.92401 -2.76772 2.38251  
C -2.21967 -2.07998 3.58134  
C -2.28303 -4.16007 2.14116  
H -2.76055 -4.67457 1.29015  
H -1.20393 -4.08154 1.92902  
H -2.40273 -4.79563 3.03588  
H -1.13926 -1.93986 3.40537  
H -2.32803 -2.69699 4.49007  
H -2.66291 -1.09088 3.78832  
C -6.26203 -0.89239 -1.17614

H -6.28006 -1.98917 -1.05820  
H -6.48398 -0.43295 -0.19739  
H -7.08298 -0.62429 -1.86204  
C -4.40839 -2.97851 2.75920  
H -4.93048 -2.02144 2.93051  
H -4.95747 -3.54064 1.98479  
H -4.47064 -3.56351 3.69209

**F<sub>0-Ar</sub>**

SCF (BP86) Energy = -1775.55986685  
Enthalpy 0K = -1774.679157  
Enthalpy 298K = -1774.623400  
Free Energy 298K = -1774.763408  
Lowest Frequency = 18.9493 cm<sup>-1</sup>  
Second Frequency = 24.6728 cm<sup>-1</sup>  
SCF (BP86-D3BJ) Energy = -  
1775.850476  
SCF (FB) Energy = -1775.600138  
SCF (DFB) Energy = -1775.606079  
SCF (BS2) Energy = -2445.274716

Rh 0.94821 0.02381 -0.51587  
P 1.29335 -2.29675 -0.19559  
P 1.08444 2.36746 -0.24267  
N 1.47482 0.07588 1.52212  
C 1.77370 -1.08146 2.18651  
C 2.14716 -1.08455 3.53897  
H 2.37145 -2.03151 4.03203  
C 2.21913 0.14611 4.20426  
H 2.50715 0.17321 5.25921  
C 1.93960 1.34432 3.53298  
H 2.00134 2.31797 4.02121  
C 1.57411 1.27103 2.18138  
O 1.70518 -2.26021 1.52469  
O 1.30086 2.41617 1.51106  
C 2.97161 -2.90565 -0.92922  
C 3.87184 -1.65419 -1.01234  
H 4.03155 -1.18038 -0.02851  
H 4.86452 -1.95186 -1.39648  
H 3.45416 -0.91675 -1.71751  
C 3.67053 -3.96427 -0.05025  
H 3.13759 -4.92333 -0.01744  
H 4.66952 -4.15708 -0.48159  
H 3.81506 -3.60925 0.98225  
C 2.71460 -3.41905 -2.36461  
H 2.18270 -2.67104 -2.97810  
H 3.69182 -3.60748 -2.84495  
H 2.15430 -4.36647 -2.38623  
C -0.03687 -3.69303 -0.19858  
C -1.03400 -3.41626 0.94737  
H -1.52555 -2.43843 0.85371  
H -1.81669 -4.19518 0.90677  
H -0.54867 -3.48012 1.93432  
C -0.75472 -3.59390 -1.56515  
H -0.08240 -3.78402 -2.41664  
H -1.54901 -4.36136 -1.59398  
H -1.22922 -2.61022 -1.70545  
C 0.55563 -5.10334 0.00568  
H 1.10398 -5.19323 0.95703  
H -0.28799 -5.81604 0.04484  
H 1.20863 -5.42403 -0.81975  
C 2.79615 3.06104 -0.80434  
C 3.79058 1.89386 -0.62190  
H 3.51502 1.03066 -1.24762

|   |          |          |          |
|---|----------|----------|----------|
| H | 4.79414  | 2.22463  | -0.94572 |
| H | 3.87567  | 1.56960  | 0.42921  |
| C | 2.70043  | 3.40951  | -2.30685 |
| H | 2.07571  | 4.29677  | -2.49511 |
| H | 3.71528  | 3.64064  | -2.67808 |
| H | 2.31037  | 2.56531  | -2.90214 |
| C | 3.28677  | 4.25738  | 0.03848  |
| H | 3.27055  | 4.03447  | 1.11715  |
| H | 4.33516  | 4.46352  | -0.24402 |
| H | 2.71513  | 5.17758  | -0.13710 |
| C | -0.33242 | 3.65197  | -0.47420 |
| C | -1.43758 | 3.36652  | 0.56567  |
| H | -1.07314 | 3.49859  | 1.59679  |
| H | -2.24925 | 4.09752  | 0.39896  |
| H | -1.86312 | 2.35943  | 0.46510  |
| C | 0.13301  | 5.11327  | -0.30450 |
| H | 0.84649  | 5.43116  | -1.07966 |
| H | -0.75787 | 5.75957  | -0.40237 |
| H | 0.56825  | 5.30352  | 0.68945  |
| C | -0.87382 | 3.41831  | -1.90473 |
| H | -1.71502 | 4.11468  | -2.07205 |
| H | -0.12129 | 3.61668  | -2.68437 |
| H | -1.25029 | 2.39229  | -2.03615 |
| C | 0.84327  | -0.00294 | -2.48217 |
| H | 1.00355  | -0.02055 | -4.78915 |
| C | 0.93239  | -0.01382 | -3.71595 |
| C | -1.08218 | -0.04159 | -0.18030 |
| C | -1.97065 | -0.09947 | -1.26450 |
| C | -1.57241 | -0.02248 | 1.14230  |
| H | -1.58359 | -0.11738 | -2.28424 |
| H | -0.88985 | 0.01826  | 1.98989  |
| C | -3.37324 | -0.13429 | -1.04262 |
| C | -2.96294 | -0.05673 | 1.38980  |
| C | -3.83806 | -0.11055 | 0.28237  |
| H | -4.91455 | -0.13598 | 0.46814  |
| C | -4.32267 | -0.19800 | -2.26200 |
| C | -4.02271 | -1.47991 | -3.08329 |
| C | -4.09670 | 1.04767  | -3.15903 |
| H | -4.30717 | 1.97874  | -2.60543 |
| H | -3.06206 | 1.09983  | -3.53817 |
| H | -4.76950 | 1.01299  | -4.03344 |
| H | -2.98580 | -1.49457 | -3.45959 |
| H | -4.69434 | -1.53643 | -3.95745 |
| H | -4.18039 | -2.38693 | -2.47486 |
| C | -3.54173 | -0.03680 | 2.82374  |
| C | -4.44715 | 1.21313  | 2.99104  |
| C | -2.44330 | 0.01385  | 3.90772  |
| H | -1.77931 | -0.86744 | 3.86510  |
| H | -1.82264 | 0.92349  | 3.82603  |
| H | -2.91056 | 0.02444  | 4.90666  |
| H | -3.87129 | 2.14359  | 2.84793  |
| H | -4.88240 | 1.23415  | 4.00528  |
| H | -5.28073 | 1.21738  | 2.26972  |
| C | -5.80917 | -0.22895 | -1.84102 |
| H | -6.04611 | -1.11397 | -1.22575 |
| H | -6.09816 | 0.67494  | -1.27760 |
| H | -6.44505 | -0.27358 | -2.74098 |
| C | -4.38838 | -1.31816 | 3.05087  |
| H | -5.22077 | -1.39501 | 2.33230  |
| H | -3.77006 | -2.22672 | 2.95049  |
| H | -4.82249 | -1.31173 | 4.06577  |

**9<sub>NH</sub>**  
SCF (BP86) Energy = -2537.88846550

Enthalpy 0K = -2536.549203  
Enthalpy 298K = -2536.467549  
Free Energy 298K = -2536.660105  
Lowest Frequency = 14.1004 cm<sup>-1</sup>  
Second Frequency = 18.1482 cm<sup>-1</sup>  
SCF (BP86-D3BJ) Energy = -2538.34435  
SCF (FB) Energy = -2538.015502  
SCF (DFB) Energy = -2538.033086  
SCF (BS2) Energy = -3877.0767

|    |          |          |          |
|----|----------|----------|----------|
| Rh | 2.74235  | -2.03509 | 1.21206  |
| P  | 4.02904  | -2.80345 | -0.60374 |
| P  | 1.95707  | -1.69022 | 3.46091  |
| N  | 4.08694  | -3.33041 | 2.26012  |
| C  | 1.20450  | -1.40063 | -0.23171 |
| H  | 1.57347  | -1.77281 | -1.19777 |
| C  | 1.86610  | -0.25067 | 0.27109  |
| H  | 2.71371  | 0.12487  | -0.31939 |
| C  | 1.16736  | 0.87470  | 1.01784  |
| H  | 1.92460  | 1.52779  | 1.48388  |
| H  | 0.53887  | 0.48444  | 1.83567  |
| C  | -0.26527 | -1.73365 | -0.05213 |
| H  | -0.59066 | -1.57649 | 0.98820  |
| H  | -0.41984 | -2.80658 | -0.26402 |
| C  | 5.17547  | -3.88319 | 1.62906  |
| C  | 6.08412  | -4.73357 | 2.28750  |
| H  | 6.93774  | -5.14670 | 1.74523  |
| C  | 5.86080  | -5.03231 | 3.63417  |
| H  | 6.55018  | -5.69294 | 4.16806  |
| C  | 4.75957  | -4.48933 | 4.29945  |
| H  | 4.56305  | -4.70945 | 5.35133  |
| C  | 3.89315  | -3.63871 | 3.58364  |
| N  | 5.33860  | -3.55374 | 0.30176  |
| N  | 2.78961  | -3.07724 | 4.18039  |
| C  | 3.33037  | -4.32677 | -1.61405 |
| C  | 2.32859  | -5.01520 | -0.65774 |
| H  | 2.81764  | -5.36659 | 0.26617  |
| H  | 1.89772  | -5.89918 | -1.16294 |
| H  | 1.50595  | -4.34267 | -0.36437 |
| C  | 4.44095  | -5.33824 | -1.97719 |
| H  | 5.22661  | -4.91303 | -2.62092 |
| H  | 3.98234  | -6.17295 | -2.53731 |
| H  | 4.90989  | -5.77905 | -1.08246 |
| C  | 2.60803  | -3.87917 | -2.90239 |
| H  | 1.84034  | -3.10778 | -2.72261 |
| H  | 2.09115  | -4.75318 | -3.33870 |
| H  | 3.30836  | -3.50424 | -3.66585 |
| C  | 5.05883  | -1.58494 | -1.70127 |
| C  | 5.73404  | -0.61408 | -0.70384 |
| H  | 4.99728  | -0.09445 | -0.06845 |
| H  | 6.29811  | 0.14747  | -1.27179 |
| H  | 6.44223  | -1.13655 | -0.04140 |
| C  | 4.13150  | -0.79387 | -2.65081 |
| H  | 3.68251  | -1.42749 | -3.43014 |
| H  | 4.73200  | -0.02030 | -3.16241 |
| H  | 3.31970  | -0.27460 | -2.11670 |
| C  | 6.14182  | -2.30238 | -2.53561 |
| H  | 6.84067  | -2.89256 | -1.91911 |
| H  | 6.75188  | -1.53847 | -3.05101 |
| H  | 5.71574  | -2.95448 | -3.31440 |
| C  | 0.18483  | -2.11955 | 4.14923  |
| C  | -0.20237 | -3.45108 | 3.46408  |
| H  | -0.18965 | -3.37035 | 2.36496  |
| H  | -1.22454 | -3.73278 | 3.77571  |

H 0.47759 -4.26831 3.75153  
 C -0.84342 -1.02782 3.78592  
 H -0.64685 -0.07273 4.29559  
 H -1.84497 -1.37074 4.10271  
 H -0.89363 -0.83766 2.70227  
 C 0.16951 -2.30947 5.68276  
 H 0.84933 -3.10518 6.03046  
 H -0.84614 -2.62389 5.98485  
 H 0.39608 -1.38142 6.23101  
 C 2.78710 -0.21495 4.46593  
 C 3.99468 0.23338 3.60989  
 H 4.71920 -0.58476 3.46143  
 H 4.52108 1.05542 4.12937  
 H 3.68839 0.59181 2.61401  
 C 3.31251 -0.67927 5.84337  
 H 2.52219 -1.07140 6.50345  
 H 3.75465 0.19274 6.35812  
 H 4.11122 -1.43317 5.75345  
 C 1.81729 0.96739 4.67126  
 H 2.38497 1.82184 5.08265  
 H 1.02160 0.73181 5.39658  
 H 1.35044 1.30880 3.73451  
 C -1.20450 1.40063 0.23171  
 H -1.57347 1.77281 1.19777  
 C -1.86610 0.25067 -0.27109  
 H -2.71371 -0.12487 0.31939  
 C -1.16736 -0.87470 -1.01784  
 H -1.92460 -1.52779 -1.48388  
 H -0.53887 -0.48444 -1.83567  
 C 0.26527 1.73365 0.05213  
 H 0.59066 1.57649 -0.98820  
 H 0.41984 2.80658 0.26402  
 Rh -2.74235 2.03509 -1.21206  
 P -4.02904 2.80345 0.60374  
 P -1.95707 1.69022 -3.46091  
 N -4.08694 3.33041 -2.26012  
 C -5.17547 3.88319 -1.62906  
 C -6.08412 4.73357 -2.28750  
 H -6.93774 5.14670 -1.74523  
 C -5.86080 5.03231 -3.63417  
 H -6.55018 5.69294 -4.16806  
 C -4.75957 4.48933 -4.29945  
 H -4.56305 4.70945 -5.35133  
 C -3.89315 3.63871 -3.58364  
 N -5.33860 3.55374 -0.30176  
 N -2.78961 3.07724 -4.18039  
 C -3.33037 4.32677 1.61405  
 C -2.32859 5.01520 0.65774  
 H -2.81764 5.36659 -0.26617  
 H -1.89772 5.89918 1.16294  
 H -1.50595 4.34267 0.36437  
 C -4.44095 5.33824 1.97719  
 H -5.22661 4.91303 2.62092  
 H -3.98234 6.17295 2.53731  
 H -4.90989 5.77905 1.08246  
 C -2.60803 3.87917 2.90239  
 H -1.84034 3.10778 2.72261  
 H -2.09115 4.75318 3.33870  
 H -3.30836 3.50424 3.66585  
 C -5.05883 1.58494 1.70127  
 C -5.73404 0.61408 0.70384  
 H -4.99728 0.09445 0.06845  
 H -6.29811 -0.14747 1.27179  
 H -6.44223 1.13655 0.04140

C -4.13150 0.79387 2.65081  
 H -3.68251 1.42749 3.43014  
 H -4.73200 0.02030 3.16241  
 H -3.31970 0.27460 2.11670  
 C -6.14182 2.30238 2.53561  
 H -6.84067 2.89256 1.91911  
 H -6.75188 1.53847 3.05101  
 H -5.71574 2.95448 3.31440  
 C -0.18483 2.11955 -4.14923  
 C 0.20237 3.45108 -3.46408  
 H 0.18965 3.37035 -2.36496  
 H 1.22454 3.73278 -3.77571  
 H -0.47759 4.26831 -3.75153  
 C 0.84342 1.02782 -3.78592  
 H 0.64685 0.07273 -4.29559  
 H 1.84497 1.37074 -4.10271  
 H 0.89363 0.83766 -2.70227  
 C -0.16951 2.30947 -5.68276  
 H -0.84933 3.10518 -6.03046  
 H 0.84614 2.62389 -5.98485  
 H -0.39608 1.38142 -6.23101  
 C -2.78710 0.21495 -4.46593  
 C -3.99468 -0.23338 -3.60989  
 H -4.71920 0.58476 -3.46143  
 H -4.52108 -1.05542 -4.12937  
 H -3.68839 -0.59181 -2.61401  
 C -3.31251 0.67927 -5.84337  
 H -2.52219 1.07140 -6.50345  
 H -3.75465 -0.19274 -6.35812  
 H -4.11122 1.43317 -5.75345  
 C -1.81729 -0.96739 -4.67126  
 H -2.38497 -1.82184 -5.08265  
 H -1.02160 -0.73181 -5.39658  
 H -1.35044 -1.30880 -3.73451  
 H -6.07668 4.05577 0.19220  
 H -2.74029 3.20078 -5.19217  
 H 6.07668 -4.05577 -0.19220  
 H 2.74029 -3.20078 5.19217

**8<sub>NH</sub>**

SCF (BP86) Energy = -1424.98194552  
 Enthalpy 0K = -1424.224952  
 Enthalpy 298K = -1424.179849  
 Free Energy 298K = -1424.296869  
 Lowest Frequency = 18.7555 cm<sup>-1</sup>  
 Second Frequency = 29.7453 cm<sup>-1</sup>  
 SCF (BP86-D3BJ) Energy = -  
 1425.222455  
 SCF (FB) Energy = -1425.024157  
 SCF (DFB) Energy = -1425.03031  
 SCF (BS2) Energy = -2094.613717

C 2.67483 4.48821 0.41572  
 H 3.68700 4.83002 0.66857  
 C 2.27335 4.63403 -0.86426  
 H 2.98567 5.08543 -1.56707  
 C 0.93717 4.22438 -1.45352  
 H 0.84271 4.66100 -2.46185  
 H 0.10790 4.65320 -0.85611  
 C 1.88265 3.87336 1.55377  
 H 0.87291 4.32615 1.60701  
 H 2.37685 4.11772 2.50899  
 C -0.09168 2.14309 -0.39994  
 H -1.14523 2.44023 -0.50145

|    |          |          |          |
|----|----------|----------|----------|
| C  | 0.35278  | 1.93675  | 0.92862  |
| H  | -0.40725 | 2.03380  | 1.71712  |
| C  | 1.73256  | 2.31393  | 1.43793  |
| H  | 1.88849  | 1.85525  | 2.42975  |
| H  | 2.52643  | 1.93378  | 0.77570  |
| C  | 0.73529  | 2.66982  | -1.55442 |
| H  | 1.71896  | 2.17999  | -1.60307 |
| H  | 0.21702  | 2.42848  | -2.50040 |
| Rh | -0.15855 | -0.01488 | 0.05203  |
| P  | -2.48984 | 0.16230  | 0.10052  |
| P  | 2.06257  | -0.93081 | -0.04772 |
| N  | -0.65409 | -2.08080 | -0.16066 |
| C  | -1.94660 | -2.51588 | 0.00310  |
| C  | -2.31030 | -3.87130 | -0.11929 |
| H  | -3.35032 | -4.17364 | 0.02367  |
| C  | -1.31426 | -4.80194 | -0.42824 |
| H  | -1.57092 | -5.86049 | -0.53139 |
| C  | 0.00664  | -4.38565 | -0.60574 |
| H  | 0.80118  | -5.09473 | -0.84967 |
| C  | 0.30530  | -3.01424 | -0.46174 |
| N  | -2.87971 | -1.54732 | 0.30264  |
| N  | 1.58261  | -2.53826 | -0.62977 |
| C  | -3.40028 | 0.56642  | -1.58380 |
| C  | -2.39373 | 0.17141  | -2.68942 |
| H  | -2.12495 | -0.89706 | -2.63794 |
| H  | -2.85485 | 0.35372  | -3.67779 |
| H  | -1.46016 | 0.75321  | -2.62611 |
| C  | -4.68406 | -0.27521 | -1.76367 |
| H  | -5.43648 | -0.09729 | -0.97945 |
| H  | -5.15028 | 0.00134  | -2.72658 |
| H  | -4.46849 | -1.35511 | -1.81529 |
| C  | -3.75353 | 2.06410  | -1.70461 |
| H  | -2.89098 | 2.72857  | -1.53161 |
| H  | -4.10928 | 2.26050  | -2.73247 |
| H  | -4.56489 | 2.35978  | -1.02029 |
| C  | -3.41597 | 0.89379  | 1.63666  |
| C  | -2.72247 | 0.25808  | 2.86479  |
| H  | -1.63850 | 0.46064  | 2.87704  |
| H  | -3.16341 | 0.68293  | 3.78456  |
| H  | -2.86224 | -0.83442 | 2.89256  |
| C  | -3.25564 | 2.43059  | 1.68685  |
| H  | -3.79333 | 2.94175  | 0.87461  |
| H  | -3.67879 | 2.79633  | 2.63970  |
| H  | -2.20223 | 2.75105  | 1.65773  |
| C  | -4.91859 | 0.54062  | 1.65377  |
| H  | -5.10554 | -0.54614 | 1.61378  |
| H  | -5.35354 | 0.89816  | 2.60488  |
| H  | -5.47764 | 1.02852  | 0.83959  |
| C  | 3.40274  | -0.58081 | -1.42026 |
| C  | 2.61057  | -0.50970 | -2.74698 |
| H  | 1.82438  | 0.26168  | -2.71872 |
| H  | 3.30690  | -0.25786 | -3.56731 |
| H  | 2.13330  | -1.47290 | -2.98806 |
| C  | 4.13921  | 0.75443  | -1.17579 |
| H  | 4.76535  | 0.73505  | -0.27142 |
| H  | 4.81045  | 0.94362  | -2.03304 |
| H  | 3.46214  | 1.61936  | -1.10395 |
| C  | 4.45754  | -1.70589 | -1.51722 |
| H  | 4.02155  | -2.69641 | -1.73204 |
| H  | 5.13167  | -1.47799 | -2.36297 |
| H  | 5.08594  | -1.77960 | -0.61570 |
| C  | 2.90057  | -1.42139 | 1.66677  |
| C  | 1.76929  | -1.32102 | 2.71641  |
| H  | 0.92857  | -1.99498 | 2.48021  |

|   |          |          |          |
|---|----------|----------|----------|
| H | 2.16707  | -1.61396 | 3.70595  |
| H | 1.36533  | -0.29940 | 2.79453  |
| C | 3.42617  | -2.87504 | 1.65837  |
| H | 4.19888  | -3.05552 | 0.89372  |
| H | 3.89302  | -3.08031 | 2.63875  |
| H | 2.61630  | -3.61167 | 1.53043  |
| C | 4.05744  | -0.47267 | 2.04365  |
| H | 4.36706  | -0.68989 | 3.08238  |
| H | 4.94363  | -0.62294 | 1.40622  |
| H | 3.77444  | 0.58979  | 2.00469  |
| H | -3.85278 | -1.85329 | 0.29622  |
| H | 2.30091  | -3.25714 | -0.72054 |

#### A<sub>NH</sub>

SCF (BP86) Energy = -1112.91730227  
 Enthalpy 0K = -1112.338468  
 Enthalpy 298K = -1112.301753  
 Free Energy 298K = -1112.403195  
 Lowest Frequency = 15.6067 cm<sup>-1</sup>  
 Second Frequency = 29.5735 cm<sup>-1</sup>  
 SCF (BP86-D3BJ) Energy = -  
 1113.092091  
 SCF (FB) Energy = -1112.968017  
 SCF (DFB) Energy = -1112.976433  
 SCF (BS2) Energy = -1782.479111

|    |          |          |          |
|----|----------|----------|----------|
| Rh | 0.00003  | -0.48544 | 0.08256  |
| P  | 2.29812  | -0.26780 | 0.03846  |
| P  | -2.29808 | -0.26787 | 0.03837  |
| N  | 0.00004  | 1.51514  | -0.06516 |
| C  | 1.18707  | 2.22164  | -0.12610 |
| C  | 1.20971  | 3.62334  | -0.25002 |
| H  | 2.16967  | 4.14313  | -0.29568 |
| C  | 0.00000  | 4.31855  | -0.31122 |
| H  | -0.00001 | 5.40784  | -0.40846 |
| C  | -1.20968 | 3.62330  | -0.25027 |
| H  | -2.16966 | 4.14304  | -0.29613 |
| C  | -1.18701 | 2.22158  | -0.12645 |
| N  | 2.35172  | 1.48700  | -0.05253 |
| N  | -2.35165 | 1.48690  | -0.05329 |
| C  | 3.15615  | -0.87912 | -1.57649 |
| C  | 2.49372  | -0.08636 | -2.72632 |
| H  | 2.76479  | 0.98162  | -2.70493 |
| H  | 2.83499  | -0.50311 | -3.69090 |
| H  | 1.39281  | -0.16414 | -2.68817 |
| C  | 4.68351  | -0.68222 | -1.61510 |
| H  | 5.20911  | -1.30303 | -0.87208 |
| H  | 5.05856  | -0.98023 | -2.61117 |
| H  | 4.97710  | 0.37083  | -1.46380 |
| C  | 2.79464  | -2.37658 | -1.72469 |
| H  | 1.69955  | -2.52605 | -1.73015 |
| H  | 3.18322  | -2.74932 | -2.68954 |
| H  | 3.22931  | -3.00460 | -0.93096 |
| C  | 3.31051  | -0.62986 | 1.63767  |
| C  | 2.37958  | -0.21667 | 2.80200  |
| H  | 1.43425  | -0.78575 | 2.79183  |
| H  | 2.89321  | -0.41186 | 3.76095  |
| H  | 2.12924  | 0.85668  | 2.76589  |
| C  | 3.59986  | -2.14434 | 1.71778  |
| H  | 4.32933  | -2.47678 | 0.96143  |
| H  | 4.02880  | -2.37684 | 2.70889  |
| H  | 2.68263  | -2.75027 | 1.61041  |
| C  | 4.61989  | 0.18230  | 1.72416  |
| H  | 4.43124  | 1.26937  | 1.71117  |

|   |          |          |          |
|---|----------|----------|----------|
| H | 5.11168  | -0.04042 | 2.68841  |
| H | 5.33740  | -0.06404 | 0.92758  |
| C | -3.15571 | -0.87972 | -1.57656 |
| C | -2.49300 | -0.08739 | -2.72654 |
| H | -1.39210 | -0.16522 | -2.68810 |
| H | -2.83409 | -0.50448 | -3.69103 |
| H | -2.76400 | 0.98061  | -2.70555 |
| C | -2.79423 | -2.37724 | -1.72414 |
| H | -3.22908 | -3.00497 | -0.93027 |
| H | -3.18261 | -2.75032 | -2.68894 |
| H | -1.69914 | -2.52677 | -1.72933 |
| C | -4.68307 | -0.68275 | -1.61562 |
| H | -4.97661 | 0.37037  | -1.46477 |
| H | -5.05789 | -0.98109 | -2.61168 |
| H | -5.20890 | -1.30327 | -0.87252 |
| C | -3.31100 | -0.62929 | 1.63739  |
| C | -2.38033 | -0.21588 | 2.80184  |
| H | -2.12972 | 0.85740  | 2.76541  |
| H | -2.89426 | -0.41055 | 3.76074  |
| H | -1.43512 | -0.78517 | 2.79221  |
| C | -4.62028 | 0.18311  | 1.72331  |
| H | -5.33765 | -0.06334 | 0.92663  |
| H | -5.11232 | -0.03924 | 2.68751  |
| H | -4.43148 | 1.27015  | 1.71006  |
| C | -3.60064 | -2.14369 | 1.71792  |
| H | -4.02989 | -2.37579 | 2.70898  |
| H | -4.32995 | -2.47623 | 0.96147  |
| H | -2.68350 | -2.74981 | 1.61099  |
| H | 3.22378  | 2.01109  | -0.11574 |
| H | -3.22373 | 2.01096  | -0.11653 |

#### B<sub>NH-Ar</sub>

SCF (BP86) Energy = -1735.87141024

Enthalpy 0K = -1734.965595

Enthalpy 298K = -1734.909682

Free Energy 298K = -1735.051739

Lowest Frequency = 11.6033 cm<sup>-1</sup>

Second Frequency = 16.5167 cm<sup>-1</sup>

SCF (BP86-D3BJ) Energy = -

1736.152509

SCF (FB) Energy = -1735.912782

SCF (DFB) Energy = -1735.91896

SCF (BS2) Energy = -2405.573751

|    |          |          |          |
|----|----------|----------|----------|
| Rh | -1.25596 | 0.14033  | -0.30468 |
| P  | -0.82791 | 2.42482  | 0.10204  |
| P  | -2.22766 | -1.98338 | -0.47013 |
| N  | -2.99693 | 0.54752  | 0.81448  |
| C  | -3.25014 | 1.81435  | 1.28730  |
| C  | -4.40632 | 2.11661  | 2.03563  |
| H  | -4.57280 | 3.13366  | 2.39807  |
| C  | -5.32060 | 1.09220  | 2.29225  |
| H  | -6.22344 | 1.30311  | 2.87324  |
| C  | -5.09486 | -0.19850 | 1.80580  |
| H  | -5.80455 | -1.00886 | 1.98777  |
| C  | -3.92479 | -0.43882 | 1.05862  |
| N  | -2.31492 | 2.77886  | 0.99353  |
| N  | -3.65644 | -1.67873 | 0.52413  |
| C  | -0.98706 | 3.59460  | -1.43046 |
| C  | -2.28923 | 3.15543  | -2.13988 |
| H  | -3.18139 | 3.34755  | -1.52157 |
| H  | -2.39614 | 3.73078  | -3.07737 |
| H  | -2.26987 | 2.08157  | -2.39232 |
| C  | -1.07730 | 5.09033  | -1.06768 |

|   |          |          |          |
|---|----------|----------|----------|
| H | -0.13097 | 5.48344  | -0.66383 |
| H | -1.30078 | 5.66447  | -1.98542 |
| H | -1.88777 | 5.30910  | -0.35095 |
| C | 0.21510  | 3.34802  | -2.36903 |
| H | 0.32774  | 2.27990  | -2.61691 |
| H | 0.04871  | 3.90039  | -3.31168 |
| H | 1.16490  | 3.70525  | -1.94230 |
| C | 0.48676  | 3.03161  | 1.39054  |
| C | 0.53605  | 1.91060  | 2.45382  |
| H | 0.87849  | 0.95770  | 2.02176  |
| H | 1.24557  | 2.20266  | 3.24964  |
| H | -0.44787 | 1.74918  | 2.92674  |
| C | 1.86356  | 3.17596  | 0.70970  |
| H | 1.90552  | 4.05191  | 0.04201  |
| H | 2.63196  | 3.32538  | 1.48968  |
| H | 2.14882  | 2.27779  | 0.13749  |
| C | 0.09732  | 4.35426  | 2.08680  |
| H | -0.83968 | 4.26347  | 2.66223  |
| H | 0.88771  | 4.60653  | 2.81690  |
| H | 0.01169  | 5.20574  | 1.39574  |
| C | -3.04742 | -2.53834 | -2.13545 |
| C | -3.55381 | -1.23241 | -2.79179 |
| H | -2.73559 | -0.52458 | -2.99703 |
| H | -4.04691 | -1.47951 | -3.74968 |
| H | -4.29482 | -0.71768 | -2.15714 |
| C | -1.98780 | -3.21025 | -3.03527 |
| H | -1.71740 | -4.21678 | -2.67719 |
| H | -2.40162 | -3.32732 | -4.05321 |
| H | -1.06398 | -2.61343 | -3.11823 |
| C | -4.25388 | -3.48205 | -1.93788 |
| H | -5.06202 | -3.00531 | -1.35772 |
| H | -4.67776 | -3.72015 | -2.93036 |
| H | -3.98813 | -4.43680 | -1.46112 |
| C | -1.38781 | -3.43801 | 0.48336  |
| C | -1.15034 | -2.89099 | 1.91049  |
| H | -2.09547 | -2.73260 | 2.45490  |
| H | -0.54986 | -3.62333 | 2.47955  |
| H | -0.60171 | -1.93321 | 1.89383  |
| C | -2.24433 | -4.71800 | 0.55961  |
| H | -2.34347 | -5.21653 | -0.41759 |
| H | -1.74863 | -5.43466 | 1.23972  |
| H | -3.25328 | -4.53754 | 0.96945  |
| C | -0.03013 | -3.75131 | -0.18392 |
| H | 0.50080  | -4.50090 | 0.43060  |
| H | -0.14269 | -4.17815 | -1.19241 |
| H | 0.61358  | -2.86086 | -0.25529 |
| C | -0.09353 | -0.13969 | -2.01709 |
| H | -0.39413 | -0.23921 | -3.05506 |
| C | 0.75719  | -0.29098 | -1.07698 |
| C | 2.09495  | -0.42238 | -0.54883 |
| C | 3.18120  | -0.08538 | -1.39943 |
| C | 2.35421  | -0.89894 | 0.75825  |
| H | 2.95817  | 0.28116  | -2.40414 |
| H | 1.50432  | -1.16213 | 1.39208  |
| C | 4.50910  | -0.22536 | -0.96433 |
| C | 3.67315  | -1.05010 | 1.22509  |
| C | 4.72240  | -0.70542 | 0.34727  |
| H | 5.75362  | -0.81854 | 0.69813  |
| C | 5.71748  | 0.11905  | -1.86218 |
| C | 6.56680  | 1.22402  | -1.17911 |
| C | 5.28605  | 0.62961  | -3.25455 |
| H | 4.70332  | -0.12623 | -3.80924 |
| H | 4.68505  | 1.55339  | -3.18777 |
| H | 6.18060  | 0.86189  | -3.85622 |

|   |          |          |          |
|---|----------|----------|----------|
| H | 5.97834  | 2.14662  | -1.03620 |
| H | 7.44207  | 1.47110  | -1.80456 |
| H | 6.94222  | 0.90623  | -0.19215 |
| C | 4.00351  | -1.57774 | 2.63858  |
| C | 2.73379  | -1.90211 | 3.45540  |
| C | 4.81766  | -0.50541 | 3.41077  |
| H | 5.76278  | -0.25792 | 2.89975  |
| H | 4.23985  | 0.42823  | 3.52195  |
| H | 5.07079  | -0.87297 | 4.42039  |
| H | 2.09925  | -1.01084 | 3.60457  |
| H | 3.02023  | -2.27340 | 4.45366  |
| H | 2.12439  | -2.68649 | 2.97364  |
| C | 4.84729  | -2.87502 | 2.51678  |
| H | 4.29228  | -3.66100 | 1.97660  |
| H | 5.79394  | -2.70178 | 1.97883  |
| H | 5.09918  | -3.26113 | 3.51981  |
| C | 6.58589  | -1.15284 | -2.05696 |
| H | 6.00966  | -1.95606 | -2.54701 |
| H | 7.45944  | -0.92260 | -2.69121 |
| H | 6.96422  | -1.54510 | -1.09830 |
| H | -4.35231 | -2.40468 | 0.69150  |
| H | -2.49493 | 3.71028  | 1.36669  |

### 10<sub>NH-Ar</sub>

SCF (BP86) Energy = -1735.87890945  
 Enthalpy 0K = -1734.973041  
 Enthalpy 298K = -1734.917054  
 Free Energy 298K = -1735.062180  
 Lowest Frequency = 7.5262 cm<sup>-1</sup>  
 Second Frequency = 10.9294 cm<sup>-1</sup>  
 SCF (BP86-D3BJ) Energy = -1736.15106  
 SCF (FB) Energy = -1735.921915  
 SCF (DFB) Energy = -1735.928453  
 SCF (BS2) Energy = -2405.581169

|    |          |          |          |
|----|----------|----------|----------|
| Rh | -1.48352 | -0.01304 | -0.24774 |
| P  | -1.60322 | 2.32208  | -0.30479 |
| P  | -1.91757 | -2.29626 | -0.04284 |
| N  | -3.51424 | 0.15991  | 0.34436  |
| C  | -4.09025 | 1.39785  | 0.49735  |
| C  | -5.43660 | 1.54262  | 0.88733  |
| H  | -5.87398 | 2.53698  | 1.00231  |
| C  | -6.18611 | 0.38527  | 1.12155  |
| H  | -7.23314 | 0.47361  | 1.42698  |
| C  | -5.61721 | -0.88351 | 0.96973  |
| H  | -6.19652 | -1.79219 | 1.14855  |
| C  | -4.26782 | -0.96600 | 0.57293  |
| N  | -3.27793 | 2.48626  | 0.25775  |
| N  | -3.63507 | -2.17691 | 0.38216  |
| C  | -1.65790 | 3.13604  | -2.05366 |
| C  | -2.72784 | 2.33584  | -2.83304 |
| H  | -3.73854 | 2.47443  | -2.41548 |
| H  | -2.74326 | 2.68990  | -3.87951 |
| H  | -2.49901 | 1.25578  | -2.84013 |
| C  | -2.03317 | 4.63098  | -2.03227 |
| H  | -1.24303 | 5.25599  | -1.58676 |
| H  | -2.17259 | 4.97756  | -3.07238 |
| H  | -2.98116 | 4.82721  | -1.50168 |
| C  | -0.28359 | 2.93468  | -2.73044 |
| H  | 0.02134  | 1.87594  | -2.72784 |
| H  | -0.35590 | 3.26780  | -3.78157 |
| H  | 0.51562  | 3.52264  | -2.25374 |
| C  | -0.65450 | 3.34393  | 1.02478  |
| C  | -0.65334 | 2.44450  | 2.28317  |

|   |          |          |          |
|---|----------|----------|----------|
| H | -0.15460 | 1.47952  | 2.09196  |
| H | -0.11088 | 2.96279  | 3.09456  |
| H | -1.67645 | 2.23881  | 2.64138  |
| C | 0.79370  | 3.57654  | 0.54495  |
| H | 0.84728  | 4.30435  | -0.28080 |
| H | 1.38331  | 3.99062  | 1.38236  |
| H | 1.28754  | 2.64280  | 0.22637  |
| C | -1.33556 | 4.68606  | 1.36749  |
| H | -2.35579 | 4.54514  | 1.76327  |
| H | -0.75338 | 5.18060  | 2.16586  |
| H | -1.37614 | 5.38202  | 0.51650  |
| C | -1.98680 | -3.38970 | -1.62844 |
| C | -2.46504 | -2.43739 | -2.74955 |
| H | -1.76612 | -1.59744 | -2.89625 |
| H | -2.53408 | -3.00383 | -3.69611 |
| H | -3.46366 | -2.02061 | -2.53450 |
| C | -0.56699 | -3.90428 | -1.94926 |
| H | -0.24079 | -4.69161 | -1.25056 |
| H | -0.56855 | -4.34716 | -2.96152 |
| H | 0.18209  | -3.09443 | -1.93946 |
| C | -2.97812 | -4.56709 | -1.51072 |
| H | -4.01352 | -4.22117 | -1.35156 |
| H | -2.97458 | -5.12600 | -2.46387 |
| H | -2.71326 | -5.27979 | -0.71522 |
| C | -1.15153 | -3.17401 | 1.49363  |
| C | -1.51356 | -2.26703 | 2.69309  |
| H | -2.59864 | -2.24252 | 2.88564  |
| H | -1.01842 | -2.66102 | 3.59871  |
| H | -1.16471 | -1.23135 | 2.53524  |
| C | -1.69450 | -4.59741 | 1.72931  |
| H | -1.37499 | -5.30374 | 0.94663  |
| H | -1.29767 | -4.97546 | 2.68896  |
| H | -2.79545 | -4.62834 | 1.80602  |
| C | 0.38445  | -3.20360 | 1.32779  |
| H | 0.83197  | -3.58117 | 2.26477  |
| H | 0.71345  | -3.87036 | 0.51632  |
| H | 0.79830  | -2.20047 | 1.13644  |
| C | 0.25362  | -0.18173 | -0.82612 |
| H | 1.49077  | -0.55600 | -2.40374 |
| C | 1.47842  | -0.32507 | -1.32340 |
| C | 2.79829  | -0.21283 | -0.66642 |
| C | 3.96031  | -0.34179 | -1.45551 |
| C | 2.93209  | 0.01079  | 0.72310  |
| H | 3.84790  | -0.51527 | -2.53179 |
| H | 2.02521  | 0.10541  | 1.33151  |
| C | 5.24582  | -0.25350 | -0.88884 |
| C | 4.20011  | 0.10168  | 1.32597  |
| C | 5.33853  | -0.03237 | 0.50089  |
| H | 6.32744  | 0.03474  | 0.95582  |
| C | 6.49023  | -0.40151 | -1.79236 |
| C | 6.47096  | 0.70926  | -2.87644 |
| C | 6.46205  | -1.79266 | -2.48027 |
| H | 6.48036  | -2.60456 | -1.73327 |
| H | 5.56149  | -1.92667 | -3.10308 |
| H | 7.34212  | -1.91159 | -3.13614 |
| H | 5.56973  | 0.65141  | -3.50994 |
| H | 7.35033  | 0.61284  | -3.53694 |
| H | 6.49721  | 1.71208  | -2.41684 |
| C | 4.31113  | 0.33624  | 2.85026  |
| C | 3.60061  | -0.82037 | 3.60243  |
| C | 3.62827  | 1.68108  | 3.21477  |
| H | 4.11836  | 2.52496  | 2.69962  |
| H | 2.56096  | 1.68592  | 2.93468  |
| H | 3.69128  | 1.86109  | 4.30247  |



|   |          |          |          |
|---|----------|----------|----------|
| H | 2.53189  | -0.88724 | 3.33617  |
| H | 3.66551  | -0.66480 | 4.69373  |
| H | 4.06937  | -1.79106 | 3.36715  |
| C | 7.81062  | -0.28093 | -0.99994 |
| H | 7.90922  | 0.70245  | -0.50863 |
| H | 7.90284  | -1.06539 | -0.22907 |
| H | 8.66535  | -0.39283 | -1.68816 |
| C | 5.77695  | 0.39507  | 3.33464  |
| H | 6.31584  | -0.54656 | 3.13336  |
| H | 6.33508  | 1.22165  | 2.86249  |
| H | 5.79930  | 0.56189  | 4.42490  |
| H | -4.19016 | -3.01081 | 0.57267  |
| H | -3.71300 | 3.40332  | 0.35547  |

**9<sub>s</sub>**

SCF (BP86) Energy = -2357.31258953  
 Enthalpy 0K = -2356.032388  
 Enthalpy 298K = -2355.950099  
 Free Energy 298K = -2356.143423  
 Lowest Frequency = -6.4659 cm<sup>-1</sup>  
 Second Frequency = 10.9800 cm<sup>-1</sup>  
 SCF (BP86-D3BJ) Energy = -  
 2357.800649  
 SCF (FB) Energy = -2357.436878  
 SCF (DFB) Energy = -2357.453655  
 SCF (BS2) Energy = -5247.449346

|    |          |          |          |
|----|----------|----------|----------|
| Rh | 2.71433  | -2.03695 | 1.20413  |
| P  | 4.16181  | -2.57080 | -0.61338 |
| P  | 1.82734  | -1.65767 | 3.42551  |
| N  | 3.92203  | -3.61426 | 2.30150  |
| C  | 1.07305  | -1.52024 | -0.13318 |
| H  | 1.32579  | -2.06208 | -1.05219 |
| C  | 1.84513  | -0.34917 | 0.11439  |
| H  | 2.59171  | -0.11662 | -0.65459 |
| C  | 1.33105  | 0.92736  | 0.75935  |
| H  | 2.19021  | 1.56834  | 1.02579  |
| H  | 0.79209  | 0.72307  | 1.69703  |
| C  | -0.38492 | -1.71358 | 0.23077  |
| H  | -0.58566 | -1.37318 | 1.25794  |
| H  | -0.62713 | -2.79057 | 0.20098  |
| C  | 5.13761  | -4.05441 | 1.83943  |
| C  | 5.86897  | -5.09680 | 2.43681  |
| H  | 6.81383  | -5.41573 | 1.99075  |
| C  | 5.36422  | -5.70959 | 3.58776  |
| H  | 5.91309  | -6.52078 | 4.07492  |
| C  | 4.15356  | -5.25278 | 4.11037  |
| H  | 3.73647  | -5.67038 | 5.02974  |
| C  | 3.46832  | -4.21466 | 3.44855  |
| S  | 5.92161  | -3.27858 | 0.45307  |
| S  | 1.95341  | -3.70450 | 4.19566  |
| C  | 3.69859  | -4.11675 | -1.73916 |
| C  | 3.33608  | -5.25560 | -0.76021 |
| H  | 4.21518  | -5.62650 | -0.20966 |
| H  | 2.93216  | -6.10303 | -1.34312 |
| H  | 2.56548  | -4.94530 | -0.03324 |
| C  | 4.85777  | -4.56259 | -2.65121 |
| H  | 5.02724  | -3.86570 | -3.48740 |
| H  | 4.59282  | -5.53942 | -3.09520 |
| H  | 5.80141  | -4.69946 | -2.09859 |
| C  | 2.45465  | -3.79860 | -2.60142 |
| H  | 1.54314  | -3.70386 | -1.99048 |
| H  | 2.28929  | -4.64839 | -3.28835 |
| H  | 2.56769  | -2.89676 | -3.22329 |

|    |          |          |          |
|----|----------|----------|----------|
| C  | 5.11129  | -1.17154 | -1.61738 |
| C  | 5.35221  | -0.00231 | -0.63403 |
| H  | 4.42243  | 0.43405  | -0.24013 |
| H  | 5.90135  | 0.79464  | -1.16744 |
| H  | 5.97153  | -0.31600 | 0.22208  |
| C  | 4.24932  | -0.71608 | -2.81440 |
| H  | 4.18468  | -1.49279 | -3.59349 |
| H  | 4.72637  | 0.16793  | -3.27508 |
| H  | 3.22561  | -0.42505 | -2.52769 |
| C  | 6.48996  | -1.63382 | -2.14737 |
| H  | 7.19086  | -1.89903 | -1.33887 |
| H  | 6.94322  | -0.78310 | -2.68823 |
| H  | 6.42964  | -2.47499 | -2.85035 |
| C  | 0.04484  | -1.37139 | 4.26135  |
| C  | -0.89700 | -2.52168 | 3.82676  |
| H  | -0.86539 | -2.72739 | 2.74642  |
| H  | -1.93251 | -2.23704 | 4.08845  |
| H  | -0.67917 | -3.46398 | 4.35281  |
| C  | -0.56016 | -0.02764 | 3.80360  |
| H  | 0.08666  | 0.83636  | 4.01494  |
| H  | -1.50267 | 0.12631  | 4.35998  |
| H  | -0.80976 | -0.02426 | 2.73083  |
| C  | 0.13643  | -1.37377 | 5.80438  |
| H  | 0.62891  | -2.27458 | 6.20411  |
| H  | -0.89368 | -1.36057 | 6.20587  |
| H  | 0.64965  | -0.48584 | 6.20327  |
| C  | 3.19028  | -0.61137 | 4.41149  |
| C  | 4.47154  | -0.63143 | 3.54418  |
| H  | 4.96405  | -1.61514 | 3.55194  |
| H  | 5.18868  | 0.10241  | 3.95616  |
| H  | 4.26579  | -0.35699 | 2.49125  |
| C  | 3.52629  | -1.16713 | 5.80786  |
| H  | 2.68384  | -1.11898 | 6.51157  |
| H  | 4.34609  | -0.55890 | 6.23208  |
| H  | 3.87839  | -2.20989 | 5.76442  |
| C  | 2.69904  | 0.85060  | 4.51324  |
| H  | 3.52613  | 1.46589  | 4.91165  |
| H  | 1.85001  | 0.97047  | 5.20324  |
| H  | 2.42599  | 1.27295  | 3.53112  |
| C  | -1.07305 | 1.52024  | 0.13318  |
| H  | -1.32579 | 2.06208  | 1.05219  |
| C  | -1.84513 | 0.34917  | -0.11439 |
| H  | -2.59171 | 0.11662  | 0.65459  |
| C  | -1.33105 | -0.92736 | -0.75935 |
| H  | -2.19021 | -1.56834 | -1.02579 |
| H  | -0.79209 | -0.72307 | -1.69703 |
| C  | 0.38492  | 1.71358  | -0.23077 |
| H  | 0.58566  | 1.37318  | -1.25794 |
| H  | 0.62713  | 2.79057  | -0.20098 |
| Rh | -2.71433 | 2.03695  | -1.20413 |
| P  | -4.16181 | 2.57080  | 0.61338  |
| P  | -1.82734 | 1.65767  | -3.42551 |
| N  | -3.92203 | 3.61426  | -2.30150 |
| C  | -5.13761 | 4.05441  | -1.83943 |
| C  | -5.86897 | 5.09680  | -2.43681 |
| H  | -6.81383 | 5.41573  | -1.99075 |
| C  | -5.36422 | 5.70959  | -3.58776 |
| H  | -5.91309 | 6.52078  | -4.07492 |
| C  | -4.15356 | 5.25278  | -4.11037 |
| H  | -3.73647 | 5.67038  | -5.02974 |
| C  | -3.46832 | 4.21466  | -3.44855 |
| S  | -5.92161 | 3.27858  | -0.45307 |
| S  | -1.95341 | 3.70450  | -4.19566 |
| C  | -3.69859 | 4.11675  | -1.73916 |

C -3.33608 5.25560 0.76021  
 H -4.21518 5.62650 0.20966  
 H -2.93216 6.10303 1.34312  
 H -2.56548 4.94530 0.03324  
 C -4.85777 4.56259 2.65121  
 H -5.02724 3.86570 3.48740  
 H -4.59282 5.53942 3.09520  
 H -5.80141 4.69946 2.09859  
 C -2.45465 3.79860 2.60142  
 H -1.54314 3.70386 1.99048  
 H -2.28929 4.64839 3.28835  
 H -2.56769 2.89676 3.22329  
 C -5.11129 1.17154 1.61738  
 C -5.35221 0.00231 0.63403  
 H -4.42243 -0.43405 0.24013  
 H -5.90135 -0.79464 1.16744  
 H -5.97153 0.31600 -0.22208  
 C -4.24932 0.71608 2.81440  
 H -4.18468 1.49279 3.59349  
 H -4.72637 -0.16793 3.27508  
 H -3.22561 0.42505 2.52769  
 C -6.48996 1.63382 2.14737  
 H -7.19086 1.89903 1.33887  
 H -6.94322 0.78310 2.68823  
 H -6.42964 2.47499 2.85035  
 C -0.04484 1.37139 -4.26135  
 C 0.89700 2.52168 -3.82676  
 H 0.86539 2.72739 -2.74642  
 H 1.93251 2.23704 -4.08845  
 H 0.67917 3.46398 -4.35281  
 C 0.56016 0.02764 -3.80360  
 H -0.08666 -0.83636 -4.01494  
 H 1.50267 -0.12631 -4.35998  
 H 0.80976 0.02426 -2.73083  
 C -0.13643 1.37377 -5.80438  
 H -0.62891 2.27458 -6.20411  
 H 0.89368 1.36057 -6.20587  
 H -0.64965 0.48584 -6.20327  
 C -3.19028 0.61137 -4.41149  
 C -4.47154 0.63143 -3.54418  
 H -4.96405 1.61514 -3.55194  
 H -5.18868 -0.10241 -3.95616  
 H -4.26579 0.35699 -2.49125  
 C -3.52629 1.16713 -5.80786  
 H -2.68384 1.11898 -6.51157  
 H -4.34609 0.55890 -6.23208  
 H -3.87839 2.20989 -5.76442  
 C -2.69904 -0.85060 -4.51324  
 H -3.52613 -1.46589 -4.91165  
 H -1.85001 -0.97047 -5.20324  
 H -2.42599 -1.27295 -3.53112

**8<sub>s</sub>**

SCF (BP86) Energy = -1334.69800849  
 Enthalpy 0K = -1333.970218  
 Enthalpy 298K = -1333.924338  
 Free Energy 298K = -1334.043299  
 Lowest Frequency = 19.7071 cm<sup>-1</sup>  
 Second Frequency = 33.4344 cm<sup>-1</sup>  
 SCF (BP86-D3BJ) Energy = -  
 1334.953874  
 SCF (FB) Energy = -1334.738192  
 SCF (DFB) Energy = -1334.743732  
 SCF (BS2) Energy = -2779.803757

C 2.77723 4.47378 0.53422  
 H 3.75575 4.80718 0.90389  
 C 2.55570 4.57585 -0.79347  
 H 3.37011 4.98533 -1.40532  
 C 1.30712 4.16990 -1.55371  
 H 1.36854 4.56794 -2.58024  
 H 0.41148 4.63791 -1.09851  
 C 1.83056 3.93163 1.58907  
 H 0.84257 4.42711 1.50857  
 H 2.22045 4.19415 2.58672  
 C 0.08750 2.17041 -0.58287  
 H -0.92474 2.49774 -0.85535  
 C 0.32309 2.04475 0.81133  
 H -0.53629 2.26890 1.45478  
 C 1.62295 2.37623 1.51768  
 H 1.58802 1.96189 2.54115  
 H 2.49050 1.92364 1.01450  
 C 1.08803 2.61561 -1.62452  
 H 2.05542 2.11103 -1.49696  
 H 0.71189 2.33710 -2.62592  
 Rh -0.15004 0.07093 0.00396  
 P -2.47348 0.42004 0.03498  
 P 2.11474 -0.81381 -0.01451  
 N -0.72977 -2.10089 -0.11708  
 C -1.95690 -2.55807 0.29300  
 C -2.32587 -3.91784 0.27618  
 H -3.32843 -4.20603 0.60100  
 C -1.40767 -4.86685 -0.17595  
 H -1.66624 -5.92974 -0.19160  
 C -0.15447 -4.43089 -0.61407  
 H 0.60167 -5.13391 -0.97044  
 C 0.14208 -3.05508 -0.58339  
 S -3.21385 -1.45317 0.87496  
 S 1.71604 -2.59356 -1.23796  
 C -3.29620 0.45825 -1.74933  
 C -2.70302 -0.75120 -2.50727  
 H -3.05321 -1.71222 -2.09701  
 H -3.03782 -0.70001 -3.55923  
 H -1.59935 -0.73988 -2.49935  
 C -4.83249 0.34717 -1.72716  
 H -5.31636 1.28167 -1.40427  
 H -5.18021 0.14391 -2.75643  
 H -5.18765 -0.48000 -1.09086  
 C -2.87109 1.74897 -2.48597  
 H -1.78280 1.78819 -2.65036  
 H -3.35194 1.74975 -3.48120  
 H -3.19097 2.67002 -1.97297  
 C -3.38621 1.58274 1.33001  
 C -3.21400 3.06015 0.90844  
 H -3.74677 3.28794 -0.02867  
 H -3.65411 3.70147 1.69337  
 H -2.16084 3.36147 0.79403  
 C -4.89594 1.27664 1.46565  
 H -5.10277 0.22167 1.71229  
 H -5.28802 1.88180 2.30346  
 H -5.47240 1.54512 0.57037  
 C -2.72904 1.32442 2.70846  
 H -1.63323 1.42110 2.69943  
 H -3.12943 2.06182 3.42733  
 H -2.96993 0.31934 3.08942  
 C 3.75634 -0.35716 -1.03443  
 C 3.34847 -0.18635 -2.51844  
 H 2.47277 0.46677 -2.65148

H 4.19588 0.27024 -3.06113  
H 3.12572 -1.14903 -3.00491  
C 4.39471 0.95460 -0.52436  
H 4.69210 0.90562 0.53327  
H 5.31503 1.12977 -1.11104  
H 3.75714 1.84083 -0.66375  
C 4.81121 -1.48318 -0.93382  
H 4.42389 -2.46967 -1.23656  
H 5.64063 -1.23371 -1.62085  
H 5.24280 -1.57078 0.07511  
C 2.60014 -1.55265 1.76173  
C 1.30363 -1.51965 2.60447  
H 0.54887 -2.22999 2.23236  
H 1.54840 -1.80775 3.64379  
H 0.84267 -0.51674 2.62259  
C 3.12507 -3.00068 1.70407  
H 4.04459 -3.10344 1.10972  
H 3.35754 -3.32279 2.73582  
H 2.37638 -3.69960 1.30003  
C 3.65589 -0.64807 2.43641  
H 3.78652 -0.99228 3.47875  
H 4.64225 -0.71174 1.95169  
H 3.34957 0.40863 2.48107

**A<sub>s</sub>**

SCF (BP86) Energy = -1022.64568109  
Enthalpy 0K = -1022.097358  
Enthalpy 298K = -1022.060202  
Free Energy 298K = -1022.162234  
Lowest Frequency = 22.3343 cm<sup>-1</sup>  
Second Frequency = 31.0707 cm<sup>-1</sup>  
SCF (BP86-D3BJ) Energy = -  
1022.835715  
SCF (FB) Energy = -1022.68902  
SCF (DFB) Energy = -1022.695228  
SCF (BS2) Energy = -2467.682424

Rh 0.08685 -0.36747 -0.00475  
P -2.23619 -0.35789 0.09953  
P 2.34778 -0.34018 -0.07858  
N 0.08081 1.66604 -0.01826  
C -1.02534 2.41355 0.34439  
C -1.03512 3.81927 0.30479  
H -1.94878 4.35154 0.57985  
C 0.11398 4.50811 -0.08755  
H 0.12903 5.60136 -0.10854  
C 1.24363 3.77407 -0.46287  
H 2.16429 4.27290 -0.77479  
C 1.19796 2.37099 -0.44613  
S -2.52990 1.65322 0.91585  
S 2.67438 1.56527 -1.07022  
C -2.99684 -1.42114 1.52784  
C -1.92919 -1.41206 2.64681  
H -1.75885 -0.39763 3.04290  
H -2.27653 -2.05006 3.47999  
H -0.95974 -1.80644 2.29128  
C -4.32422 -0.86027 2.07870  
H -5.12803 -0.84371 1.32823  
H -4.66063 -1.50664 2.90993  
H -4.20579 0.15620 2.49083  
C -3.19529 -2.86444 1.01373  
H -2.27968 -3.27897 0.55665  
H -3.45556 -3.51167 1.87041  
H -4.01830 -2.94220 0.28550

C -3.26733 -0.38338 -1.54067  
C -2.74816 0.80084 -2.38652  
H -1.65137 0.76677 -2.50879  
H -3.20316 0.74289 -3.39165  
H -3.02530 1.77350 -1.94886  
C -2.91946 -1.70353 -2.26908  
H -3.26869 -2.59838 -1.73161  
H -3.41189 -1.70042 -3.25829  
H -1.83302 -1.79622 -2.44076  
C -4.78585 -0.25299 -1.32573  
H -5.04552 0.64932 -0.74658  
H -5.28053 -0.16455 -2.31011  
H -5.21788 -1.13391 -0.82441  
C 3.54176 -0.35997 1.43312  
C 3.13354 0.84273 2.31225  
H 2.07045 0.79692 2.60325  
H 3.74038 0.82427 3.23528  
H 3.32280 1.80484 1.80908  
C 3.28476 -1.67054 2.21152  
H 3.57053 -2.57189 1.64604  
H 3.89646 -1.65881 3.13141  
H 2.22826 -1.76160 2.51734  
C 5.01363 -0.23079 0.99589  
H 5.18575 0.68924 0.41156  
H 5.64930 -0.16875 1.89779  
H 5.35928 -1.09411 0.40722  
C 2.51739 -1.82877 -1.30642  
C 2.22538 -1.33015 -2.73629  
H 3.05950 -0.73156 -3.13646  
H 2.09132 -2.20563 -3.39789  
H 1.30839 -0.71855 -2.77820  
C 3.81811 -2.64662 -1.29310  
H 4.06819 -3.05338 -0.30110  
H 3.71074 -3.50508 -1.98165  
H 4.67148 -2.04835 -1.65139  
C 1.31239 -2.67048 -0.78438  
H 1.11911 -3.53087 -1.45410  
H 1.45556 -3.06226 0.23444  
H 0.31471 -2.10553 -0.86837

**B<sub>s-Ar</sub>**

SCF (BP86) Energy = -1645.59264327  
Enthalpy 0K = -1644.716481  
Enthalpy 298K = -1644.659786  
Free Energy 298K = -1644.805370  
Lowest Frequency = 2.9759 cm<sup>-1</sup>  
Second Frequency = 12.8255 cm<sup>-1</sup>  
SCF (BP86-D3BJ) Energy = -  
1645.890171  
SCF (FB) Energy = -1645.631464  
SCF (DFB) Energy = -1645.636906  
SCF (BS2) Energy = -3090.768764

Rh -1.11733 0.01974 -0.43859  
P -1.40795 2.37507 -0.36554  
P -1.33703 -2.31930 -0.57983  
N -2.43952 -0.11315 1.28743  
C -3.14108 0.97911 1.74666  
C -3.87948 0.96889 2.94301  
H -4.38146 1.88087 3.27387  
C -3.95589 -0.21362 3.68621  
H -4.52595 -0.24748 4.61932  
C -3.30920 -1.35442 3.20891  
H -3.37771 -2.30863 3.73663

C -2.56550 -1.27466 2.01470  
S -3.25055 2.48622 0.80739  
S -1.80417 -2.79810 1.50794  
C -2.05967 3.20084 -2.00550  
C -2.90214 2.12073 -2.72023  
H -3.78386 1.83254 -2.12363  
H -3.26717 2.53255 -3.67888  
H -2.31501 1.21365 -2.93475  
C -2.95119 4.43861 -1.76303  
H -2.42204 5.26341 -1.26584  
H -3.29561 4.81175 -2.74496  
H -3.85512 4.19622 -1.17884  
C -0.84680 3.58788 -2.88117  
H -0.12758 2.75996 -2.99650  
H -1.21163 3.85900 -3.88845  
H -0.31157 4.46441 -2.48317  
C -0.20553 3.53615 0.63867  
C -0.08110 2.88247 2.03219  
H 0.23259 1.82751 1.96219  
H 0.68964 3.42510 2.60817  
H -1.02361 2.93706 2.60101  
C 1.17798 3.53470 -0.04951  
H 1.16066 4.00508 -1.04391  
H 1.87296 4.12216 0.57805  
H 1.59726 2.52217 -0.14517  
C -0.72652 4.97794 0.78653  
H -1.75320 5.01720 1.18764  
H -0.07398 5.51259 1.50095  
H -0.68949 5.53613 -0.16229  
C -2.98126 -2.76955 -1.54646  
C -3.95147 -1.59303 -1.29156  
H -3.50441 -0.62196 -1.57143  
H -4.85822 -1.74283 -1.90611  
H -4.27104 -1.53898 -0.23833  
C -2.64324 -2.82721 -3.05308  
H -2.04947 -3.71625 -3.31795  
H -3.58802 -2.88561 -3.62372  
H -2.10611 -1.92631 -3.39656  
C -3.66025 -4.07504 -1.08968  
H -3.86414 -4.07572 -0.00650  
H -4.63153 -4.15924 -1.61086  
H -3.07947 -4.97476 -1.33483  
C 0.07126 -3.63224 -0.90160  
C 1.12233 -3.48809 0.21970  
H 0.74659 -3.83672 1.19476  
H 1.99285 -4.11490 -0.04634  
H 1.48096 -2.45396 0.33420  
C -0.45901 -5.08102 -0.91518  
H -1.09094 -5.29162 -1.79175  
H 0.40918 -5.76299 -0.97034  
H -1.02100 -5.34144 -0.00245  
C 0.73599 -3.30289 -2.26025  
H 1.53211 -4.04840 -2.43911  
H 0.03655 -3.36423 -3.10769  
H 1.19970 -2.30568 -2.25943  
C 0.10246 0.16796 -2.14264  
H -0.08363 0.21172 -3.21049  
C 0.90589 0.10099 -1.14884  
C 2.18874 0.05482 -0.48580  
C 3.35565 0.18634 -1.28037  
C 2.31209 -0.12494 0.91143  
H 3.24183 0.32851 -2.35963  
H 1.39436 -0.22706 1.50049  
C 4.63387 0.13845 -0.69824

C 3.57902 -0.18535 1.52483  
C 4.71609 -0.04907 0.70012  
H 5.70359 -0.09142 1.16135  
C 3.68825 -0.40562 3.05076  
C 3.01646 -1.75478 3.42237  
C 2.96351 0.74758 3.79363  
H 3.41702 1.72359 3.55019  
H 1.89247 0.79443 3.53338  
H 3.03495 0.60133 4.88547  
H 1.94965 -1.77387 3.14089  
H 3.07878 -1.92401 4.51152  
H 3.51689 -2.59888 2.91788  
C 5.88562 0.28868 -1.59195  
C 5.83828 1.66403 -2.31006  
C 5.89731 -0.84578 -2.65133  
H 5.93623 -1.83799 -2.17011  
H 5.00364 -0.81670 -3.29743  
H 6.78279 -0.74796 -3.30297  
H 4.94229 1.76736 -2.94531  
H 6.72276 1.78442 -2.95931  
H 5.83511 2.49256 -1.58133  
C 5.15402 -0.44606 3.53714  
H 5.72177 -1.27006 3.07190  
H 5.68408 0.50016 3.33305  
H 5.17545 -0.60669 4.62807  
C 7.19887 0.20937 -0.78247  
H 7.26937 1.01191 -0.02811  
H 7.31123 -0.76156 -0.26986  
H 8.05827 0.32259 -1.46428

**10<sub>S-AE</sub>**

SCF (BP86) Energy = -1645.60578491  
Enthalpy 0K = -1644.729252  
Enthalpy 298K = -1644.672617  
Free Energy 298K = -1644.818899  
Lowest Frequency = 8.1052 cm<sup>-1</sup>  
Second Frequency = 11.1223 cm<sup>-1</sup>  
SCF (BP86-D3BJ) Energy = -  
1645.893289  
SCF (FB) Energy = -1645.645613  
SCF (DFB) Energy = -1645.65129  
SCF (BS2) Energy = -3090.782308

Rh -1.47069 -0.02732 -0.19928  
P -1.59295 2.30962 -0.34536  
P -1.49362 -2.37040 -0.06711  
N -3.60411 -0.03752 0.32944  
C -4.28192 1.12400 0.62260  
C -5.64556 1.14780 0.97023  
H -6.13455 2.10308 1.17482  
C -6.34844 -0.05661 1.04748  
H -7.40641 -0.06411 1.32598  
C -5.68312 -1.25128 0.76263  
H -6.19762 -2.21338 0.81845  
C -4.32524 -1.20817 0.39522  
S -3.50050 2.72210 0.63662  
S -3.63698 -2.79183 -0.03173  
C -1.85320 2.99900 -2.14226  
C -3.06641 2.23259 -2.71551  
H -4.00538 2.49568 -2.20194  
H -3.18014 2.50186 -3.78105  
H -2.92235 1.13922 -2.65647  
C -2.11877 4.51509 -2.18109  
H -1.23228 5.10350 -1.89555

H -2.37904 4.80180 -3.21627  
H -2.96560 4.80801 -1.53771  
C -0.60086 2.64042 -2.97486  
H -0.42450 1.55299 -2.98816  
H -0.77171 2.96866 -4.01620  
H 0.31327 3.13729 -2.61661  
C -0.43889 3.39924 0.77025  
C -0.26546 2.59398 2.07746  
H 0.16700 1.59730 1.88958  
H 0.41650 3.14826 2.74739  
H -1.22312 2.46143 2.60846  
C 0.92451 3.56788 0.06462  
H 0.85533 4.22067 -0.82050  
H 1.62292 4.05199 0.77063  
H 1.37069 2.60597 -0.23460  
C -1.03797 4.78344 1.10198  
H -1.99121 4.70791 1.65166  
H -0.32829 5.31535 1.76137  
H -1.19206 5.41093 0.21223  
C -0.99896 -3.43206 -1.61656  
C -1.39376 -2.57882 -2.84278  
H -0.85617 -1.61715 -2.86427  
H -1.13978 -3.13905 -3.76098  
H -2.47676 -2.37046 -2.86606  
C 0.52764 -3.66924 -1.60388  
H 0.82981 -4.38360 -0.82148  
H 0.81660 -4.11121 -2.57475  
H 1.09979 -2.73680 -1.47464  
C -1.73856 -4.78692 -1.67876  
H -2.82999 -4.66443 -1.77753  
H -1.39238 -5.32664 -2.57890  
H -1.53223 -5.43050 -0.81082  
C -0.86184 -3.09214 1.61789  
C -1.63043 -2.32014 2.71406  
H -2.70773 -2.55364 2.71012  
H -1.22752 -2.61431 3.69990  
H -1.50307 -1.22798 2.60857  
C -1.10505 -4.60525 1.76750  
H -0.49309 -5.19979 1.07054  
H -0.81955 -4.91009 2.79079  
H -2.16632 -4.87338 1.63010  
C 0.64373 -2.76252 1.73511  
H 0.98566 -3.05403 2.74457  
H 1.26245 -3.30799 1.00755  
H 0.83870 -1.68476 1.61249  
C 0.28824 -0.02893 -0.71658  
H 1.52337 -0.14451 -2.31449  
C 1.52135 -0.05242 -1.21249  
C 2.85618 0.01047 -0.57903  
C 3.03564 0.23558 0.80449  
C 3.99104 -0.16312 -1.39972  
H 2.15320 0.38437 1.43632  
H 3.84311 -0.33320 -2.47226  
C 4.32271 0.28068 1.37192  
C 5.29383 -0.12477 -0.86902  
C 5.43160 0.09638 0.51693  
H 6.43432 0.12950 0.94454  
C 6.50655 -0.32157 -1.80556  
C 6.49900 0.78594 -2.89315  
C 6.40735 -1.71286 -2.48673  
H 6.41517 -2.52279 -1.73739  
H 5.48636 -1.81448 -3.08552  
H 7.26453 -1.86681 -3.16509  
H 5.58010 0.75947 -3.50301

H 7.35634 0.65483 -3.57608  
H 6.57455 1.78855 -2.43875  
C 4.48669 0.53932 2.88750  
C 3.72399 -0.55049 3.68637  
C 3.90015 1.93402 3.23296  
H 4.43045 2.73234 2.68621  
H 2.82900 2.00051 2.97640  
H 4.00013 2.13524 4.31399  
H 2.64539 -0.55227 3.45371  
H 3.83077 -0.37405 4.77100  
H 4.12148 -1.55531 3.46324  
C 7.85145 -0.24810 -1.04945  
H 8.00049 0.73266 -0.56574  
H 7.93533 -1.03281 -0.27788  
H 8.68224 -0.39451 -1.76000  
C 5.96533 0.51472 3.33471  
H 6.44045 -0.46117 3.13560  
H 6.56114 1.29888 2.83706  
H 6.02498 0.69604 4.42114

**HCCNMe<sub>2</sub>**

SCF (BP86) Energy = -211.293321810  
Enthalpy 0K = -211.195618  
Enthalpy 298K = -211.187833  
Free Energy 298K = -211.225131  
Lowest Frequency = 158.2611 cm<sup>-1</sup>  
Second Frequency = 180.2648 cm<sup>-1</sup>  
SCF (BP86-D3BJ) Energy = -  
211.3057554  
SCF (FB) Energy = -211.2967408  
SCF (DFB) Energy = -211.2974719  
SCF (BS2) Energy = -211.3540515

C 0.99442 -0.00148 -0.08578  
C 2.20683 -0.00057 0.08839  
H 3.27750 -0.00104 0.13008  
N -0.34545 -0.00010 -0.27857  
C -1.05127 1.23987 0.07380  
H -2.05164 1.22815 -0.39171  
H -1.17214 1.36681 1.17046  
H -0.48839 2.09905 -0.32011  
C -1.05404 -1.23844 0.07394  
H -2.05437 -1.22456 -0.39161  
H -0.49312 -2.09895 -0.31987  
H -1.17525 -1.36500 1.17061

**TS (C-10)<sub>C-NMe<sub>2</sub></sub>**

SCF (BP86) Energy = -1292.13454000  
Enthalpy 0K = -1291.436055  
Enthalpy 298K = -1291.392318  
Free Energy 298K = -1291.508778  
Lowest Frequency = -754.6174 cm<sup>-1</sup>  
Second Frequency = 15.8377 cm<sup>-1</sup>  
SCF (BP86-D3BJ) Energy = -  
1292.349423  
SCF (FB) Energy = -1292.175404  
SCF (DFB) Energy = -1292.181271  
SCF (BS2) Energy = -1961.73039

Rh 0.00568 -0.03306 0.03108  
P 2.32323 -0.28015 -0.06863  
P -2.31099 -0.32647 0.09867  
N 0.02177 -2.16467 -0.05470  
C 1.17007 -2.84386 -0.38388

|   |          |          |          |   |          |          |          |
|---|----------|----------|----------|---|----------|----------|----------|
| C | 1.20592  | -4.24611 | -0.43435 | H | -5.36543 | -0.34848 | 0.98667  |
| H | 2.14118  | -4.74749 | -0.69816 | C | -3.17305 | -0.30174 | -1.63440 |
| C | 0.04615  | -4.98239 | -0.17026 | C | -2.43201 | -1.35744 | -2.48865 |
| H | 0.05577  | -6.07546 | -0.21459 | H | -2.60728 | -2.38770 | -2.13561 |
| C | -1.12657 | -4.29032 | 0.14994  | H | -2.80397 | -1.29959 | -3.52773 |
| H | -2.05356 | -4.82766 | 0.36824  | H | -1.34417 | -1.17113 | -2.50366 |
| C | -1.11537 | -2.88804 | 0.21293  | C | -4.67800 | -0.63091 | -1.59919 |
| C | 2.39094  | -2.04040 | -0.75194 | H | -5.26931 | 0.15671  | -1.10531 |
| H | 3.31459  | -2.57611 | -0.47399 | H | -5.05195 | -0.71439 | -2.63621 |
| H | 2.41206  | -1.92201 | -1.85123 | H | -4.89146 | -1.59211 | -1.10079 |
| C | -2.35532 | -2.13882 | 0.63072  | C | -2.93784 | 1.08794  | -2.26907 |
| H | -3.26467 | -2.66311 | 0.29069  | H | -3.31941 | 1.08029  | -3.30643 |
| H | -2.39728 | -2.11814 | 1.73553  | H | -3.46326 | 1.89260  | -1.73095 |
| C | 3.19947  | -0.38829 | 1.65387  | H | -1.86319 | 1.33305  | -2.29914 |
| C | 2.49759  | -1.53605 | 2.41765  | C | 0.00366  | 1.87190  | -0.00681 |
| H | 2.69633  | -2.52586 | 1.97319  | H | -0.27701 | 2.60729  | 1.14927  |
| H | 2.87976  | -1.56012 | 3.45441  | C | -0.00996 | 3.16592  | 0.04749  |
| H | 1.40532  | -1.38264 | 2.46027  | N | -0.00031 | 4.48555  | -0.24146 |
| C | 4.71263  | -0.67013 | 1.57710  | C | 1.09652  | 5.30980  | 0.29752  |
| H | 5.27625  | 0.17339  | 1.14746  | H | 1.19149  | 6.22027  | -0.31632 |
| H | 5.10044  | -0.83173 | 2.59973  | H | 0.91450  | 5.61042  | 1.34874  |
| H | 4.94681  | -1.57839 | 0.99572  | H | 2.03881  | 4.74669  | 0.24230  |
| C | 2.93365  | 0.93152  | 2.41302  | C | -1.29601 | 5.17877  | -0.36315 |
| H | 1.85135  | 1.12961  | 2.49009  | H | -1.71700 | 5.45670  | 0.62384  |
| H | 3.34128  | 0.84814  | 3.43703  | H | -1.15105 | 6.09865  | -0.95287 |
| H | 3.41336  | 1.80038  | 1.93595  | H | -2.00708 | 4.52888  | -0.89270 |
| C | 3.36341  | 0.69583  | -1.37761 |   |          |          |          |
| C | 2.43960  | 0.87038  | -2.60663 |   |          |          |          |
| H | 1.51040  | 1.40318  | -2.34877 |   |          |          |          |
| H | 2.97626  | 1.45193  | -3.37862 |   |          |          |          |
| H | 2.15850  | -0.09431 | -3.06405 |   |          |          |          |
| C | 3.71807  | 2.08855  | -0.81392 |   |          |          |          |
| H | 4.45741  | 2.03437  | 0.00154  |   |          |          |          |
| H | 4.16305  | 2.70147  | -1.61884 |   |          |          |          |
| H | 2.82232  | 2.61510  | -0.44489 |   |          |          |          |
| C | 4.65102  | -0.03854 | -1.81368 |   |          |          |          |
| H | 4.44418  | -1.02059 | -2.27041 |   |          |          |          |
| H | 5.16086  | 0.56968  | -2.58317 |   |          |          |          |
| H | 5.36285  | -0.18487 | -0.98818 |   |          |          |          |
| C | -3.38146 | 0.51448  | 1.47720  |   |          |          |          |
| C | -2.47680 | 0.58674  | 2.73037  |   |          |          |          |
| H | -1.54664 | 1.14512  | 2.53525  |   |          |          |          |
| H | -3.02750 | 1.09293  | 3.54433  |   |          |          |          |
| H | -2.19016 | -0.41184 | 3.10366  |   |          |          |          |
| C | -3.75091 | 1.94773  | 1.03788  |   |          |          |          |
| H | -4.48238 | 1.95529  | 0.21362  |   |          |          |          |
| H | -4.21307 | 2.48014  | 1.88916  |   |          |          |          |
| H | -2.86438 | 2.52310  | 0.72241  |   |          |          |          |
| C | -4.66430 | -0.27134 | 1.83030  |   |          |          |          |
| H | -4.45043 | -1.28925 | 2.19614  |   |          |          |          |
| H | -5.18967 | 0.25718  | 2.64684  |   |          |          |          |

The full Gaussian reference (g09, D.01):

Frisch, M. J.; Trucks, G. W.; Schlegel, H. B.; Scuseria, G. E.; Robb, M. A.; Cheeseman, J. R.; Scalmani, G.; Barone, V.; Mennucci, B.; Petersson, G. A.; Nakatsuji, H.; Caricato, M.; Li, X.; Hratchian, H. P.; Izmaylov, A. F.; Bloino, J.; Zheng, G.; Sonnenberg, J. L.; Hada, M.; Ehara, M.; Toyota, K.; Fukuda, R.; Hasegawa, J.; Ishida, M.; Nakajima, T.; Honda, Y.; Kitao, O.; Nakai, H.; Vreven, T.; Montgomery, J. A., Jr.; Peralta, J. E.; Ogliaro, F.; Bearpark, M.; Heyd, J. J.; Brothers, E.; Kudin, K. N.; Staroverov, V. N.; Kobayashi, R.; Normand, J.; Raghavachari, K.; Rendell, A.; Burant, J. C.; Iyengar, S. S.; Tomasi, J.; Cossi, M.; Rega, N.; Millam, J. M.; Klene, M.; Knox, J. E.; Cross, J. B.; Bakken, V.; Adamo, C.; Jaramillo, J.; Gomperts, R.; Stratmann, R. E.; Yazyev, O.; Austin, A. J.; Cammi, R.; Pomelli, C.; Ochterski, J. W.; Martin, R. L.; Morokuma, K.; Zakrzewski, V. G.; Voth, G. A.; Salvador, P.; Dannenberg, J. J.; Dapprich, S.; Daniels, A. D.; Farkas, O.; Foresman, J. B.; Ortiz, J. V.; Cioslowski, J.; Fox, D. J. Gaussian 09 (Revision D.01); Gaussian Inc.: Wallingford, CT, 2009.
